# Supplementary material for: Barium-catalyzed C–OH/P–H dehydrative cross-coupling for C–P bond construction
Source: Royal Society of Chemistry journal article supplement (doi:10.1039/c8cc06530f), 2018-01-01
Supplement: c8cc06530f1.pdf [file c8cc06530f1.pdf]

# Supplementary Information

## Barium-Catalyzed C-OH/P-H Dehydrative Cross-coupling for C-P Bond Construction

Xiangyang Wo,<sup>a</sup> Peizhong Xie,<sup>\*a</sup> Weishan Fu,<sup>a</sup> Cuiqing Gao,<sup>b</sup> Yanan Liu,<sup>a</sup> Zuolian Sun,<sup>a</sup> and Teck-Peng Loh<sup>\*a,c</sup>

<sup>a</sup> School of Chemistry and Molecular Engineering, Institute of Advanced Synthesis, Jiangsu National Synergetic Innovation Center for Advanced Materials, Nanjing Tech University, Nanjing 211816, P. R. China.

<sup>b</sup> Southern Modern Forestry Collaborative Innovation Center, College of Forestry, Nanjing Forestry University, Nanjing, 210037, China

<sup>c</sup> Division of Chemistry and Biological Chemistry, School of Physical and Mathematical Sciences, Nanyang Technological University, Singapore 637371.

E-mail: peizhongxie@njtech.edu.cn  
teckpeng@ntu.edu.sg

## Contents

|                                                                        |    |
|------------------------------------------------------------------------|----|
| 1. General Information .....                                           | 1  |
| 2. General Procedure for The C-OH/P-H Dehydrative Cross-Coupling ..... | 1  |
| 3. Addition Experiments .....                                          | 1  |
| 4. Analytical Data for All New Compounds .....                         | 3  |
| 5. References .....                                                    | 16 |
| 6. NMR Spectra for New Compounds .....                                 | 17 |

## 1. General Information

Unless otherwise noted, all commercially available compounds were used as received. All solvents were purified according to standard procedures. The  $^1\text{H}$  NMR and spectra was recorded at 400MHz,  $^{13}\text{C}$  NMR was recorded at 101MHz.  $^{31}\text{P}$  NMR was recorded at 162 MHz.  $^1\text{H}$  and  $^{13}\text{C}$  NMR Chemical shifts were calibrated to tetramethylsilane as an external reference. Data are reported in the following order: chemical shift ( $\delta$ ) in ppm; multiplicities are indicated s (singlet), d (doublet), t (triplet), dd (doublet of doublets), m (multiplet); coupling constants ( $J$ ) are in Hertz (Hz). HRMS were obtained on an IonSpec FT-ICR mass spectrometer with ESI resource. Melting points were measured on a RY-I apparatus and are reported uncorrected. The starting materials **2a** purchased from *J&K Chemical Ltd* (Shanghai), *dibenzo[c,e][1,2]oxaphosphinine 6-oxide* and additive  $\text{KPF}_6$  were purchased from *Energy Chemical Ltd* (Shanghai). The catalyst  $\text{Ba}(\text{NTf}_2)_2$  was purchased from *Tokyo Chemical Industry (TCI) (Shanghai) CO., Ltd.* Other phosphine oxides **2**<sup>1</sup> and allylic alcohols **2**<sup>2</sup> were readily prepared according to the related literatures.

## 2. General Procedure for The C-OH/P-H Dehydrative Cross-Coupling

Phosphine oxide **2** (0.6 mmol) was added to allylic alcohol **1** (0.3 mmol),  $\text{Ba}(\text{NTf}_2)_2$  (0.03 mmol) and  $\text{KPF}_6$  (0.03 mmol) in acetonitrile (2 mL) in Schlenk tube (10 mL). The reaction was stirred at 100 °C (oil bath) or 30 °C for 12h. After complete conversion, the residue was purified *via* PTLC (Petroleum ether (bp: 60-90 °C)/ethyl acetate = 1:1) or column chromatography (Petroleum ether (bp: 60-90 °C)/ethyl acetate = 1:1) to afford the corresponding products **3a-3af**.

## 3. Addition Experiments

### 3.1 The role of phosphine oxide in this reaction.

We performed the reaction between **1a** and **2a** in 1/1, 2/1 and 1/2 ratio. The crude  $^{31}\text{P}$  NMR was as shown follow. Judging from the crude NMR and TLC investigation, no by-product can be isolated. The ratio of **1a**/**2a** was 1/2 give the best yield. Instead of involved into the reaction, the extra one equivalent of phosphine oxide **2a** still can be detected by NMR, which might be able to promote the reaction through equilibrium system in this reaction.

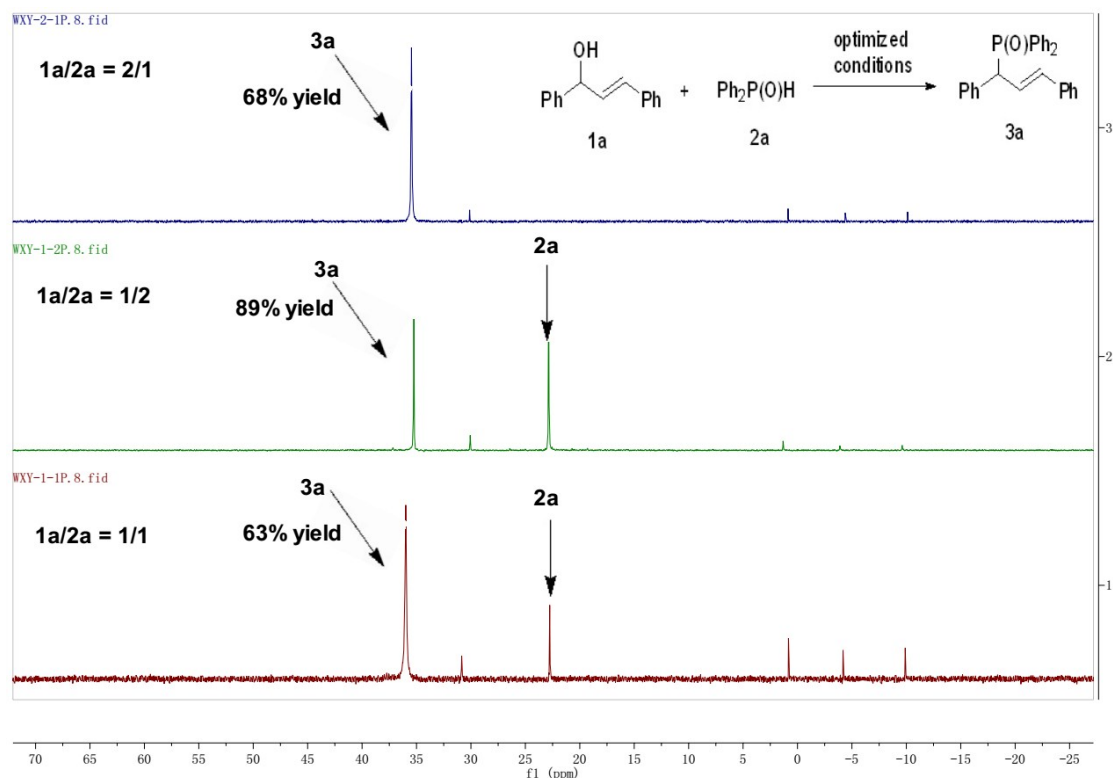

### 3.2 The interaction between catalyst and allyl alcohols.

we conducted the NMR study by measure the  $^1\text{H}$  NMR spectra of the mixture of 1a,  $\text{Ba}(\text{NTf}_2)_2$  and  $\text{KPF}_6$  in  $\text{CD}_3\text{CN}$ . As is shown in the following picture, the interaction between catalyst and 1a was obviously, especially at the higher temperature (50 °C).

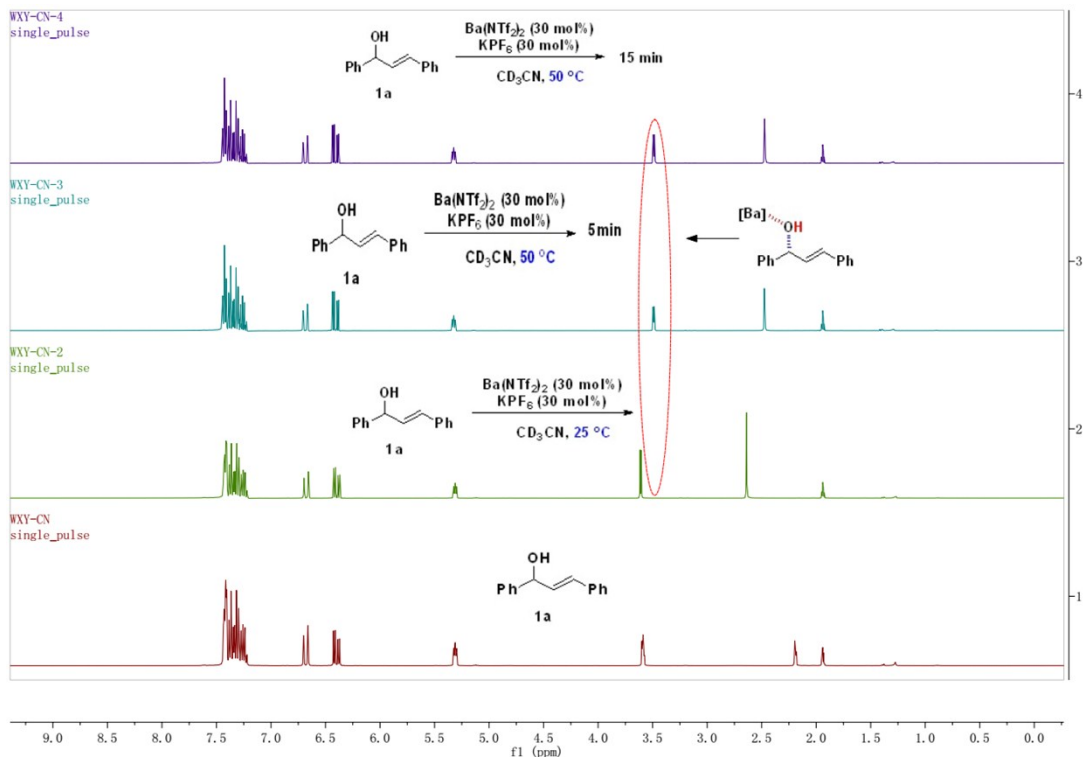

## 4. Analytical Data for All New Compounds

### (*E*)-(1,3-diphenylallyl)diphenylphosphine oxide (**3a**)<sup>3</sup>

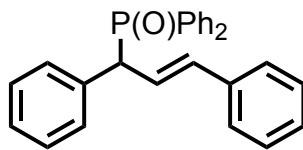

Following the general procedure, **3a** was isolated as white solid. Mp: 212-214 °C. <sup>1</sup>H NMR (400 MHz, Chloroform-*d*) δ 7.89 – 7.83 (m, 2H), 7.62 – 7.55 (m, 2H), 7.51 – 7.41 (m, 3H), 7.38 – 7.34 (m, 3H), 7.31 – 7.25 (m, 2H), 7.24 – 7.19 (m, 6H), 7.18 – 7.13 (m, 2H), 6.64 – 6.54 (m, 1H), 6.32 (dd, *J* = 15.8, 4.8 Hz, 1H), 4.39 (dd, *J* = 9.8, 9.8 Hz, 1H). <sup>13</sup>C NMR (101 MHz, Chloroform-*d*) δ = 136.81, 136.78, 136.03 (d, *J*<sub>C-P</sub> = 5.9 Hz), 134.55, 134.44, 132.23 (d, *J*<sub>C-P</sub> = 29.5 Hz), 131.89 (d, *J*<sub>C-P</sub> = 2.7 Hz), 131.84, 131.76, 131.62 (d, *J*<sub>C-P</sub> = 2.8 Hz), 131.46, 131.37, 131.27 (d, *J*<sub>C-P</sub> = 29.7 Hz), 129.59, 129.53, 128.68, 128.66, 128.61, 128.53, 128.50, 128.35, 128.23, 127.71, 127.23 (d, *J*<sub>C-P</sub> = 2.1 Hz), 126.48, 124.70 (d, *J*<sub>C-P</sub> = 7.2 Hz), 52.41 (d, *J*<sub>C-P</sub> = 65.0 Hz). IR (KBr): 3079.55, 3057.34, 3024.68, 1645.32, 1275.42, 764.22, 748.72, 721.94, 692.32. HRMS (ESI/[M+H]<sup>+</sup>) Calcd. for: C<sub>27</sub>H<sub>24</sub>OP 395.1565, found 395.1562.

**The Procedure for gram scale reaction (3a):** Diphenylphosphine oxide (2.02g, 10 mmol) was added to (*E*)-1,3-diphenylprop-2-en-1-ol (1.05g, 5 mmol), Ba(NTf<sub>2</sub>)<sub>2</sub> (0.35g, 0.5 mmol) and KPF<sub>6</sub> (0.09g, 0.5 mmol) in acetonitrile (15 ml). The reaction was stirred at 100 °C for 12h. Corresponding (*E*)-(1,3-diphenylallyl)diphenylphosphine oxide (**3a**) precipitated from the solvent (65% yield, the was purity over 98% by NMR). The solvent was removed under reduced pressure. The residue was purified by silica gel chromatography with Petroleum ether (bp: 60-90 °C)/ethyl acetate = 1:1 to give (*E*)-(1,3-diphenylallyl)diphenylphosphine oxide (**3a**) as white solid (1.68 g, 85% yield).

### (*E*)-(1,3-di-*p*-tolylallyl)diphenylphosphine oxide (**3b**)<sup>3</sup>

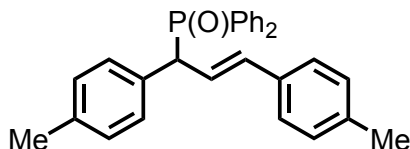

Following the general procedure, the reaction was conducted at 100 °C for 12h. **3b** was isolated as white solid. Mp: 186-187 °C. <sup>1</sup>H NMR (400 MHz, Chloroform-*d*) δ = 7.88 – 7.78 (m, 2H), 7.66 – 7.56 (m, 2H), 7.50 – 7.34 (m, 4H), 7.33 – 7.20 (m, 4H), 7.14 – 6.98 (m, 6H), 6.57 – 6.45 (m, 1H), 6.26 (dd, *J* = 15.7, 3.6 Hz, 1H), 4.34 (dd, *J* = 9.6, 9.6 Hz, 1H), 2.26 (s, 3H), 2.24 (s, 3H). <sup>13</sup>C NMR (101 MHz, Chloroform-*d*) δ = 137.38, 136.70 (d, *J*<sub>C-P</sub> = 2.4 Hz), 134.16, 134.05, 132.92, 132.86, 132.33 (d, *J*<sub>C-P</sub> = 29.4 Hz), 131.78, 131.70, 131.49, 131.44, 131.35, 131.22, 129.34, 129.30, 129.28, 129.12, 128.45, 128.34, 128.25, 128.14, 126.30, 123.68 (d, *J*<sub>C-P</sub> = 7.0 Hz), 51.87 (d, *J*<sub>C-P</sub> = 65.4 Hz), 21.21, 21.11. <sup>31</sup>P NMR (162 MHz, Chloroform-*d*) δ = 31.45. IR (KBr): 3005.80, 2989.46, 2921.39, 2853.46, 1632.32, 1275.43, 802.30, 822.85, 764.27, 749.80, 703.74. HRMS (ESI/[M+H]<sup>+</sup>) Calcd. for: C<sub>29</sub>H<sub>28</sub>OP 423.1878, found 423.1876.

### (*E*)-(1,3-di-*m*-tolylallyl)diphenylphosphine oxide (**3c**)<sup>3</sup>

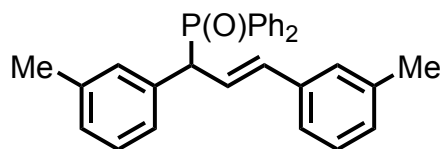

Following the general procedure, the reaction was conducted at 100 °C for 12h. **3c** was isolated as white solid. Mp: 164-167 °C. <sup>1</sup>H NMR (400 MHz, Chloroform-*d*) δ = 7.90 – 7.79 (m, 2H), 7.61 – 7.53 (m, 2H), 7.51 – 7.41 (m, 3H), 7.40 – 7.33 (m, 1H), 7.33 – 7.22 (m, 2H), 7.18 – 7.04 (m, 5H), 7.03 – 6.94 (m, 3H), 6.65 – 6.50 (m, 1H), 6.29 (dd, *J* = 15.8, 3.6 Hz, 1H), 4.33 (dd, *J* = 9.5, 9.5 Hz, 1H), 2.27 (s, 3H), 2.24 (s, 3H). <sup>13</sup>C NMR (101 MHz, Chloroform-*d*) δ = 138.13, 137.98, 136.70 (d, *J*<sub>C-P</sub> = 2.2 Hz), 135.89 (d, *J*<sub>C-P</sub> = 5.9 Hz), 134.40, 134.29, 132.29 (d, *J*<sub>C-P</sub> = 33.6 Hz), 131.79, 131.71, 131.45, 131.36, 131.16, 130.17 (d, *J*<sub>C-P</sub> = 5.6 Hz), 128.47, 128.38, 128.30, 128.18, 128.07, 127.88, 127.86, 127.00, 126.48 (d, *J*<sub>C-P</sub> = 5.8 Hz), 124.48 (d, *J*<sub>C-P</sub> = 7.2 Hz), 123.68, 52.33 (d, *J*<sub>C-P</sub> = 65.2 Hz), 21.43, 21.34. <sup>31</sup>P NMR (162 MHz, Chloroform-*d*) δ = 31.40. IR (KBr): 3005.23, 2955.52, 2922.56, 1632.32, 1275.35, 764.19, 749.49, 723.82, 703.27. HRMS (ESI/[M+H]<sup>+</sup>) Calcd. for: C<sub>29</sub>H<sub>28</sub>OP 423.1878, found 423.1878.

**(*E*)-(1,3-di-*o*-tolylallyl)diphenylphosphine oxide (3d)**

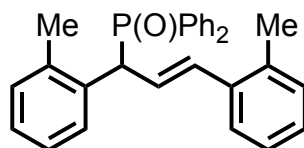

Following the general procedure, the reaction was conducted at 100 °C for 12h. **3d** was isolated as white solid. Mp: 168-170 °C. <sup>1</sup>H NMR (400 MHz, Chloroform-*d*) δ = 7.99 – 7.79 (m, 3H), 7.60 – 7.40 (m, 5H), 7.40 – 7.15 (m, 5H), 7.15 – 6.91 (m, 5H), 6.56 – 6.41 (m, 1H), 6.35 (dd, *J* = 15.7, 7.6 Hz, 1H), 4.64 (dd, *J* = 9.5, 9.5 Hz, 1H), 2.14 (s, 3H), 1.99 (s, 3H). <sup>13</sup>C NMR (101 MHz, Chloroform-*d*) δ = 135.94, 135.82 (d, *J*<sub>C-P</sub> = 7.3 Hz), 135.15, 134.43 (d, *J*<sub>C-P</sub> = 5.2 Hz), 132.83, 132.48, 132.37, 131.97, 131.89, 131.83, 131.59, 131.16, 131.08, 130.95, 130.44, 129.98, 129.44 (d, *J*<sub>C-P</sub> = 4.8 Hz), 128.58, 128.46, 128.23, 128.11, 127.51, 127.13, 126.57, 126.01, 125.96, 47.77 (d, *J*<sub>C-P</sub> = 66.1 Hz) 19.79, 19.52. <sup>31</sup>P NMR (162 MHz, Chloroform-*d*) δ = 31.90. IR (KBr): 3005.97, 2955.24, 2923.15, 2868.71, 1645.32, 1275.43, 764.13, 748.82, 723.82, 695.97. HRMS (ESI/[M+H]<sup>+</sup>) Calcd. for: C<sub>29</sub>H<sub>28</sub>OP 423.1878, found 423.1880.

**(*E*)-(1,3-bis(4-fluorophenyl)allyl)diphenylphosphine oxide (3e)<sup>3</sup>**

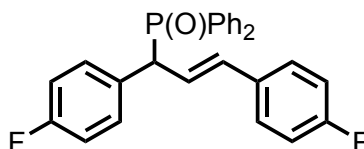

Following the general procedure, the reaction was conducted at 100 °C for 12h. **3e** was isolated as white solid. Mp: 183-187 °C. <sup>1</sup>H NMR (400 MHz, Chloroform-*d*) δ = 8.02 – 7.72 (m, 2H), 7.71 – 7.22 (m, 10H), 7.22 – 7.06 (m, 2H), 7.04 – 6.81 (m, 4H), 6.53 – 6.37 (m, 1H), 6.27 (dd, *J* = 15.7, 8Hz, 1H), 4.37 (dd, *J* = 9.2, 9.2 Hz, 1H). <sup>13</sup>C NMR (101 MHz, Chloroform-*d*) δ = 161.96 (d, *J*<sub>C-F</sub> = 246.1 Hz), 162.33 (d, *J*<sub>C-F</sub> = 247.2 Hz), 133.37, 133.26, 132.70, 131.92, 131.65, 131.56, 131.25, 131.16, 131.03, 130.97, 130.89, 128.59, 128.48, 128.37, 128.25, 127.94, 127.86, 124.13 (d, *J*<sub>C-P</sub> = 5.5 Hz), 115.60, 115.48, 115.40, 115.27, 51.24 (d, *J*<sub>C-P</sub> = 65.3 Hz). <sup>31</sup>P NMR (162 MHz, Chloroform-*d*) δ = 31.33. <sup>19</sup>F NMR (376 MHz, Chloroform-*d*) δ = -114.00, -115.03. IR (KBr): 3055.84, 2988.53, 2901.28, 1645.32, 1223.56, 1158.75, 843.19, 818.56, 752.09, 718.92, 705.68, 693.26. HRMS (ESI/[M+H]<sup>+</sup>) Calcd. for: C<sub>27</sub>H<sub>22</sub>F<sub>2</sub>OP 431.1376, found 431.1376.

**(*E*)-(1,3-bis(3-fluorophenyl)allyl)diphenylphosphine oxide (3f)<sup>3</sup>**

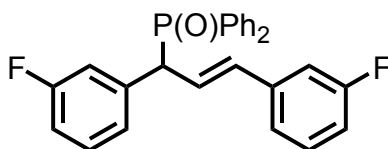

Following the general procedure, the reaction was conducted at 100 °C for 12h. **3f** was isolated as white solid. Mp: 187-190 °C.  $^1\text{H}$  NMR (400 MHz, Chloroform-*d*)  $\delta$  = 7.91 – 7.80 (m, 2H), 7.66 – 7.56 (m, 2H), 7.56 – 7.44 (m, 3H), 7.44 – 7.38 (m, 1H), 7.37 – 7.28 (m, 2H), 7.24 – 7.02 (m, 4H), 6.97 (d,  $J$  = 7.8 Hz, 1H), 6.93 – 6.83 (m, 3H), 6.60 – 6.48 (m, 1H), 6.27 (dd,  $J$  = 15.8, 3.8 Hz, 1H), 4.36 (dd,  $J$  = 9.3, 9.3 Hz, 1H).  $^{13}\text{C}$  NMR (101 MHz, Chloroform-*d*)  $\delta$  = 162.92 (d,  $J_{\text{C-F}}$  = 245.5 Hz), 162.66 (d,  $J_{\text{C-F}}$  = 245.0 Hz), 138.75 (dd,  $J$  = 7.7, 2.4 Hz), 138.17 (dd,  $J$  = 7.3, 6.1 Hz), 133.59 (dd,  $J$  = 11.1, 2.6 Hz), 132.03, 131.80, 131.63, 131.54, 131.25, 131.17, 130.75 (d,  $J_{\text{C-P}}$  = 18.9 Hz), 130.04 (dd,  $J_{\text{C-P}}$  = 8.5, 1.6 Hz), 129.97, 129.88, 128.64, 128.53, 128.41, 128.29, 125.55 (d,  $J_{\text{C-P}}$  = 7.4 Hz), 125.14 (d,  $J_{\text{C-P}}$  = 5.9), 122.20, 116.40 (d,  $J_{\text{C-P}}$  = 22.3), 114.55 (d,  $J_{\text{C-P}}$  = 21.3 Hz), 114.23 (d,  $J_{\text{C-P}}$  = 21.0 Hz), 112.91 (d,  $J_{\text{C-P}}$  = 21.7 Hz), 51.91 (d,  $J_{\text{C-P}}$  = 64.4 Hz).  $^{31}\text{P}$  NMR (162 MHz, Chloroform-*d*)  $\delta$  = 31.09.  $^{19}\text{F}$  NMR (376 MHz, Chloroform-*d*)  $\delta$  = -112.26, -113.37. IR (KBr): 3059.11, 2914.73, 1643.43, 1275.42, 1144.02, 748.45, 729.76, 719.73, 700.28. HRMS (ESI/[M+H] $^+$ ) Calcd. for: C<sub>27</sub>H<sub>22</sub>F<sub>2</sub>OP 431.1376, found 431.1377.

**(E)-(1,3-bis(2-fluorophenyl)allyl)diphenylphosphine oxide (3g)**

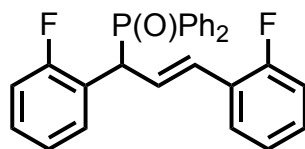

Following the general procedure, the reaction was conducted at 100 °C for 12h. **3g** was isolated as white solid. Mp: 193-195 °C.  $^1\text{H}$  NMR (400 MHz, Chloroform-*d*)  $\delta$  = 8.06 – 7.78 (m, 3H), 7.74 – 7.28 (m, 9H), 7.21 – 7.06 (m, 3H), 7.06 – 6.80 (m, 3H), 6.69 – 6.56 (m, 1H), 6.51 (dd,  $J$  = 16.0, 7.9 Hz, 1H), 4.90 (dd,  $J$  = 7.9, 7.9 Hz, 1H).  $^{13}\text{C}$  NMR (101 MHz, Chloroform-*d*)  $\delta$  = 159.88 (d,  $J_{\text{C-F}}$  = 248.0 Hz), 159.68 (d,  $J_{\text{C-F}}$  = 248.0 Hz), 131.94, 131.71, 131.55, 131.46, 130.95, 130.87, 130.69, 129.07 (d,  $J_{\text{C-P}}$  = 8.3 Hz), 128.75 (d,  $J_{\text{C-P}}$  = 8.4 Hz), 128.63, 128.51, 128.32, 128.20, 127.26, 125.83 (dd,  $J_{\text{C-F,C-P}}$  = 7.3, 3.9 Hz), 124.57, 124.25 (d,  $J_{\text{C-P}}$  = 11.7 Hz), 124.02 (d,  $J_{\text{C-P}}$  = 3.4 Hz), 123.21 (dd,  $J_{\text{C-F,C-P}}$  = 14.5, 4.9 Hz), 115.52 (d,  $J_{\text{C-P}}$  = 22.0 Hz), 115.11 (d,  $J_{\text{C-P}}$  = 22.8 Hz), 43.14 (d,  $J_{\text{C-P}}$  = 65.7 Hz).  $^{31}\text{P}$  NMR (162 MHz, Chloroform-*d*)  $\delta$  = 31.90.  $^{19}\text{F}$  NMR (376 MHz, Chloroform-*d*)  $\delta$  = -118.26, -118.48. IR (KBr): 2954.83, 2920.11, 1645.11, 1275.39, 763.46, 750.49, 721.37, 706.04, 695.57. HRMS (ESI/[M+H] $^+$ ) Calcd. for: C<sub>27</sub>H<sub>22</sub>F<sub>2</sub>OP 431.1376, found 431.1374.

**(E)-(1,3-bis(4-bromophenyl)allyl)diphenylphosphine oxide (3h)<sup>3</sup>**

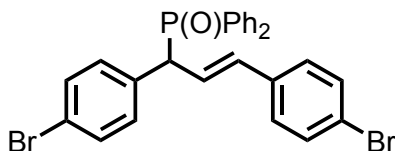

Following the general procedure, the reaction was conducted at 100 °C for 12h. **3h** was isolated as white solid. Mp: 209-211 °C.  $^1\text{H}$  NMR (400 MHz, Chloroform-*d*)  $\delta$  = 7.88 – 7.80 (m, 2H), 7.64 – 7.54 (m, 2H), 7.53 – 7.37 (m, 4H), 7.37 – 7.29 (m, 6H), 7.28 – 7.20 (m, 2H), 7.08 – 6.99 (m, 2H), 6.57 – 6.42 (m, 1H), 6.21 (dd,  $J$  = 15.8, 3.8 Hz, 1H), 4.33 (dd,  $J$  = 9.2, 9.2 Hz, 1H).  $^{13}\text{C}$  NMR (101 MHz, Chloroform-*d*)  $\delta$  = 135.36, 134.82 (d,  $J_{\text{C-P}}$  = 5.9 Hz), 133.55, 133.44, 132.01, 131.83, 131.80, 131.73, 131.58, 131.52, 131.24, 131.15, 131.10, 131.04, 130.76 (d,  $J_{\text{C-P}}$  = 13.5 Hz), 128.63, 128.51, 128.46, 128.35, 127.87, 124.90 (d,  $J$  = 7.3 Hz), 121.61, 121.36, 51.59 (d,  $J_{\text{C-P}}$  = 64.6 Hz).  $^{31}\text{P}$  NMR (162 MHz,

Chloroform-*d*)  $\delta$  = 30.95. IR (KBr): 2955.24, 2923.37, 2851.80,, 1654.60, 1275.37, 816.03, 749.73, 722.77, 707.41, 546.22, 518.87. HRMS (ESI/[M+H]<sup>+</sup>) Calcd. for: C<sub>27</sub>H<sub>22</sub>Br<sub>2</sub>OP 550.9775, found 550.9775.

**(*E*)-(1,3-bis(3-bromophenyl)allyl)diphenylphosphine oxide (3i)**

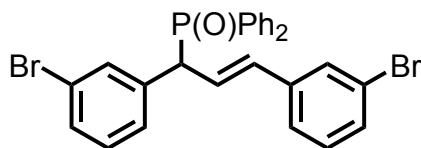

Following the general procedure, the reaction was conducted at 100 °C for 12h. **3i** was isolated as white solid. Mp: 127-129 °C. <sup>1</sup>H NMR (400 MHz, Chloroform-*d*)  $\delta$  = 7.90 – 7.81 (m, 2H), 7.64 – 7.55 (m, 2H), 7.55 – 7.42 (m, 4H), 7.42 – 7.25 (m, 7H), 7.13 – 7.03 (m, 3H), 6.59 – 6.47 (m, 1H), 6.23 (dd, *J* = 15.8, 3.7 Hz, 1H), 4.34 (dd, *J* = 9.2, 9.2 Hz, 1H). <sup>13</sup>C NMR (101 MHz, Chloroform-*d*)  $\delta$  = 137.44, 136.97 (d, *J*<sub>C-P</sub> = 5.8 Hz), 132.33, 132.22, 131.27, 131.02, 130.81, 130.55, 130.46, 130.20, 130.11, 129.56 (d, *J*<sub>C-P</sub> = 15.9 Hz), 129.57, 129.30 (d, *J*<sub>C-P</sub> = 2.3 Hz), 129.07 (d, *J*<sub>C-P</sub> = 1.9 Hz), 128.93, 128.20, 127.61, 127.49, 127.37, 127.26, 126.92 (d, *J*<sub>C-P</sub> = 5.5 Hz), 124.53 (d, *J*<sub>C-P</sub> = 7.2 Hz), 123.92, 121.59, 121.42, 50.79 (d, *J*<sub>C-P</sub> = 64.2 Hz). <sup>31</sup>P NMR (162 MHz, Chloroform-*d*)  $\delta$  = 31.17. IR (KBr): 3053.50, 2919.32, 1642.18, 1275.47, 792.33, 749.04, 721.70, 700.74, 557.48, 513.78. HRMS (ESI/[M+H]<sup>+</sup>) Calcd. for: C<sub>27</sub>H<sub>22</sub>Br<sub>2</sub>OP 550.9775, found 550.9777.

**(*E*)-(1,3-bis(4-(trifluoromethyl)phenyl)allyl)diphenylphosphine oxide (3j)**

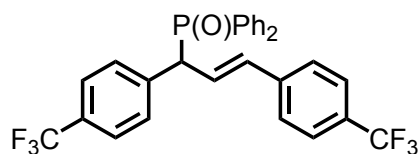

Following the general procedure, the reaction was conducted at 100 °C for 12h. **3j** was isolated as white solid. Mp: 188-189 °C. <sup>1</sup>H NMR (400 MHz, Chloroform-*d*)  $\delta$  7.94 – 7.83 (m, 2H), 7.65 – 7.55 (m, 2H), 7.55 – 7.45 (m, 9H), 7.45 – 7.38 (m, 1H), 7.38 – 7.21 (m, 4H), 6.74 – 6.58 (m, 1H), 6.35 (dd, *J* = 15.8, 3.7 Hz, 1H), 4.48 (dd, *J* = 9.2, 9.2 Hz, 1H). <sup>13</sup>C NMR (101 MHz, Chloroform-*d*)  $\delta$  = 139.91, 139.79, 133.71 (d, *J*<sub>C-P</sub> = 10.9 Hz), 132.28 (d, *J*<sub>C-P</sub> = 2.9 Hz), 132.08 (d, *J*<sub>C-P</sub> = 2.9 Hz), 131.69, 131.61, 131.56, 131.43, 131.26, 131.18, 130.59, 130.45, 129.86, 129.80, 129.54, 128.83, 128.72, 128.63, 128.51, 126.73, 126.64, 126.63, 125.63, 125.55, 122.81, 52.27 (d, *J*<sub>C-P</sub> = 63.4 Hz). <sup>31</sup>P NMR (162 MHz, Chloroform-*d*)  $\delta$  = 31.06. <sup>19</sup>F NMR (376 MHz, Chloroform-*d*)  $\delta$  = -62.49. IR (KBr): 3062.97, 2914.48, 1614.36, 1330.53, 1225.68, 1066.33, 847.95, 832.39, 811.19, 720.08. HRMS (ESI/[M+H]<sup>+</sup>) Calcd. for: C<sub>29</sub>H<sub>22</sub>F<sub>6</sub>OP 531.1312, found 531.1326.

**(*E*)-(1,3-bis(4-methoxyphenyl)allyl)diphenylphosphine oxide (3k)**

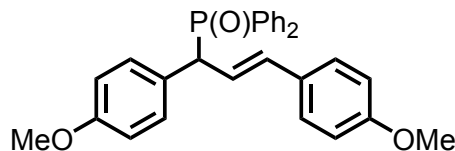

Following the general procedure, the reaction was conducted at 30 °C for 12h. **3k** was isolated as white solid. Mp: 147-149 °C. <sup>1</sup>H NMR (400 MHz, Chloroform-*d*)  $\delta$  = 7.88 – 7.78 (m, 2H), 7.66 – 7.55 (m, 2H), 7.46 – 7.30 (m, 4H), 7.30 – 7.20 (m, 4H), 7.14 – 7.04 (m, 2H), 6.73 – 6.67 (m, 4H), 6.44 – 6.33 (m, 1H), 6.24 (dd, *J* = 15.8, 3.6 Hz, 1H), 4.34 (dd, *J* = 9.3, 9.3 Hz, 1H), 3.71 (s, 3H), 3.65 (s, 3H). <sup>13</sup>C NMR (101 MHz, Chloroform-*d*)  $\delta$  = 159.14, 158.59 (d, *J*<sub>C-P</sub> = 2.2 Hz), 133.69 (d, *J*<sub>C-P</sub> = 11.4 Hz), 132.25 (d, *J*<sub>C-P</sub> = 30.7 Hz), 131.69, 131.60, 131.47, 131.33, 131.24, 131.14, 130.48, 130.43, 129.50,

128.47, 128.36, 128.29, 128.17, 127.92 (d,  $J_{C-P}$  = 6.0 Hz), 127.52, 122.28 (d,  $J_{C-P}$  = 6.8 Hz), 114.02, 113.79, 55.24, 55.13, 51.13 (d,  $J_{C-P}$  = 66.2 Hz).  $^{31}\text{P}$  NMR (162 MHz, Chloroform-*d*)  $\delta$  = 31.80. IR (KBr): 3055.44, 3031.68, 3002.49, 2954.91, 2935.35, 1644.69, 1250.82, 829.28, 812.85, 732.68, 720.15. HRMS (ESI/[M+H] $^{+}$ ) Calcd. for:  $\text{C}_{29}\text{H}_{28}\text{O}_3\text{P}$  455.1776, found 455.1779.

**(*E*)-(1,3-bis(4-(tert-butyl)phenyl)allyl)diphenylphosphine oxide (3l)**

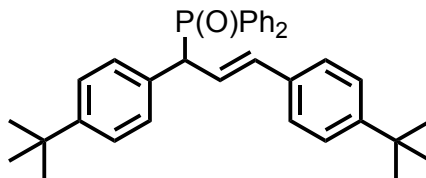

Following the general procedure, the reaction was conducted at 100 °C for 12h. **3l** was isolated as white solid. Mp: 261-264 °C.  $^1\text{H}$  NMR (400 MHz, Chloroform-*d*)  $\delta$  = 7.90 – 7.77 (m, 2H), 7.61 – 7.34 (m, 6H), 7.33 – 7.11 (m, 10H), 6.61 – 6.46 (m, 1H), 6.33 (dd,  $J$  = 15.6, 7.8 Hz 1H), 4.35 (dd,  $J$  = 9.6, 9.6 Hz, 1H), 1.27 (s, 9H), 1.25 (s, 9H).  $^{13}\text{C}$  NMR (101 MHz, Chloroform-*d*)  $\delta$  = 150.73, 150.02 (d,  $J_{C-P}$  = 2.6 Hz), 134.16, 134.03, 132.86, 132.80, 132.67, 131.96, 131.88, 131.83 (d,  $J_{C-P}$  = 2.8 Hz), 131.71, 131.52, 131.43, 131.05, 129.12 (d,  $J_{C-P}$  = 5.7 Hz), 128.58, 128.47, 128.26, 128.14, 126.21, 125.55, 125.44, 124.00 (d,  $J_{C-P}$  = 6.8 Hz), 51.92 (d,  $J_{C-P}$  = 65.4 Hz), 34.66, 34.53, 31.42, 31.37.  $^{31}\text{P}$  NMR (162 MHz, Chloroform-*d*)  $\delta$  = 32.27. IR (KBr): 2962.57, 2929.36, 2906.16, 2866.40, 1646.67, 1266.14, 731.54, 717.99, 706.83. HRMS (ESI/[M+H] $^{+}$ ) Calcd. for:  $\text{C}_{35}\text{H}_{40}\text{OP}$  507.2817, found 507.2802.

**(*E*)-(1,3-di(thiophen-2-yl)allyl)diphenylphosphine oxide (3m)**

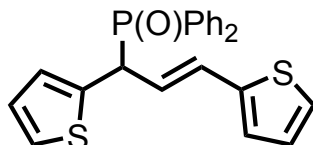

Following the general procedure, the reaction was conducted at 30 °C for 12h. **3m** was isolated as white solid. Mp: 204-207 °C.  $^1\text{H}$  NMR (400 MHz, Chloroform-*d*)  $\delta$  7.86 – 7.76 (m, 2H), 7.74 – 7.65 (m, 2H), 7.55 – 7.41 (m, 4H), 7.40 – 7.33 (m, 2H), 7.11 (dd,  $J$  = 13.7, 5.0 Hz, 2H), 7.04 (s, 1H), 6.93 – 6.84 (m, 2H), 6.80 (d,  $J$  = 3.2 Hz, 1H), 6.48 (dd,  $J$  = 15.6, 3.8 Hz, 1H), 6.35 – 6.19 (m, 1H), 4.68 (dd,  $J$  = 12.3, 8.6 Hz, 1H).  $^{13}\text{C}$  NMR (101 MHz, Chloroform-*d*)  $\delta$  = 141.36 (d,  $J_{C-P}$  = 3.1 Hz), 136.80 (d,  $J_{C-P}$  = 6.0 Hz), 132.00 (d,  $J_{C-P}$  = 2.8 Hz), 131.85 (d,  $J_{C-P}$  = 2.7 Hz), 131.78, 131.70, 131.53, 131.44, 130.66 (d,  $J_{C-P}$  = 30.4 Hz), 128.58, 128.46, 128.43, 128.31, 127.67 (d,  $J_{C-P}$  = 10.9 Hz), 127.31, 127.23 (d,  $J_{C-P}$  = 6.0 Hz), 127.11 (d,  $J_{C-P}$  = 2.3 Hz), 125.93 (d,  $J_{C-P}$  = 2.1 Hz), 124.97 (d,  $J_{C-P}$  = 2.5 Hz), 124.66, 123.36 (d,  $J_{C-P}$  = 6.7 Hz), 47.06 (d,  $J$  = 66.4 Hz).  $^{31}\text{P}$  NMR (162 MHz, Chloroform-*d*)  $\delta$  = 30.46. IR (KBr): 3104.06, 3054.70, 1636.36, 1275.40, 749.72, 722.10, 695.83. HRMS (ESI/[M+H] $^{+}$ ) Calcd. for:  $\text{C}_{23}\text{H}_{20}\text{OPS}_2$  407.0693, found 407.0695.

**(*E*)-(1,3-bis(2,4-dichlorophenyl)allyl)diphenylphosphine oxide (3n)**

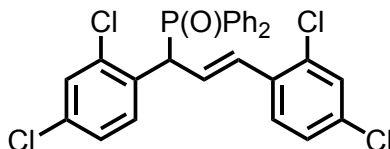

Following the general procedure, the reaction was conducted at 100 °C for 12h. **3n** was isolated as white solid. Mp: 160-164 °C.  $^1\text{H}$  NMR (400 MHz, Chloroform-*d*)  $\delta$  8.07 (dd,  $J$  = 8.3, 1.8 Hz, 1H), 7.94 – 7.84 (m, 2H), 7.66 – 7.57 (m, 2H), 7.56 – 7.47 (m, 3H), 7.45 – 7.39 (m, 1H), 7.37 – 7.29 (m, 3H), 7.28 – 7.22 (m, 3H), 7.12 (dd,  $J$  = 8.5, 2.1 Hz, 1H), 6.60 (dd,  $J$  = 15.7, 3.9 Hz, 1H), 6.42 – 6.30 (m, 1H),



5.07 (dd,  $J_{\text{H-P}} = 8.8, 8.8$  Hz, 1H).  $^{13}\text{C}$  NMR (101 MHz, *Chloroform-d*)  $\delta = 134.35, 134.27, 133.98, 133.79$  (d,  $J_{\text{C-P}} = 2.4$  Hz),  $133.44$  (d,  $J_{\text{C-P}} = 1.9$  Hz),  $133.16, 133.13, 132.48$  (d,  $J_{\text{C-P}} = 4.2$  Hz),  $132.22$  (d,  $J_{\text{C-P}} = 2.9$  Hz),  $132.06$  (d,  $J_{\text{C-P}} = 2.9$  Hz),  $131.65, 131.60, 131.55, 131.46, 130.98, 130.66, 130.63, 130.55, 129.31, 128.88, 128.76, 128.57, 128.46, 127.89, 127.25, 126.61$  (d,  $J_{\text{C-P}} = 7.4$  Hz),  $46.89$  (d,  $J_{\text{C-P}} = 65.5$  Hz).  $^{31}\text{P}$  NMR (162 MHz, *Chloroform-d*)  $\delta = 32.19$ . IR (KBr): 3094.36, 3075.78, 3052.29, 2921.75, 1632.75, 1258.72, 773.30, 749.19, 724.75, 699.44. HRMS (ESI/[M+H]<sup>+</sup>) Calcd. for:  $\text{C}_{27}\text{H}_{20}\text{Cl}_4\text{OP}$  531.0006, found 531.0008.

**(*E*)-(1,3-bis(3,5-dimethylphenyl)allyl)diphenylphosphine oxide (3o)**

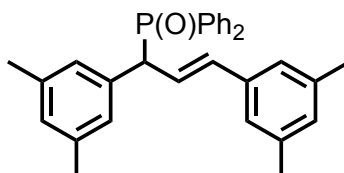

Following the general procedure, the reaction was conducted at 100 °C for 12h. **3o** was isolated as white solid. Mp: 193-196 °C.  $^1\text{H}$  NMR (400 MHz, *Chloroform-d*)  $\delta$  7.88 – 7.79 (m, 2H), 7.61 – 7.53 (m, 2H), 7.51 – 7.33 (m, 4H), 7.33 – 7.22 (m, 2H), 6.91 (s, 2H), 6.85 (s, 2H), 6.80 (d,  $J = 8.2$  Hz, 2H), 6.65 – 6.50 (m, 1H), 6.25 (dd,  $J = 15.7, 3.8$  Hz, 1H), 4.28 (dd,  $J = 9.5, 9.5$  Hz, 1H), 2.23 (s, 6H), 2.19 (s, 6H).  $^{13}\text{C}$  NMR (101 MHz, *Chloroform-d*)  $\delta = 137.90$  (d,  $J_{\text{C-P}} = 1.8$  Hz),  $137.84, 136.71$  (d,  $J_{\text{C-P}} = 2.4$  Hz),  $135.82$  (d,  $J_{\text{C-P}} = 5.9$  Hz),  $134.30$  (d,  $J_{\text{C-P}} = 11.5$  Hz),  $132.38$  (d,  $J_{\text{C-P}} = 37.3$  Hz),  $131.82, 131.74, 131.68$  (d,  $J_{\text{C-P}} = 2.8$  Hz),  $131.42$  (d,  $J_{\text{C-P}} = 37.2$  Hz),  $131.51, 131.42, 129.28, 128.75$  (d,  $J_{\text{C-P}} = 2.3$  Hz),  $128.44, 128.32, 128.12, 128.01, 127.23$  (d,  $J_{\text{C-P}} = 5.8$  Hz),  $124.37, 124.30, 52.28$  (d,  $J_{\text{C-P}} = 65.3$  Hz),  $21.30, 21.22$ .  $^{31}\text{P}$  NMR (162 MHz, *Chloroform-d*)  $\delta = 31.48$ . IR (KBr): 3054.01, 2955.16, 2922.20, 2850.71, 1645.52, 1264.48, 722.77, 703.77. HRMS (ESI/[M+H]<sup>+</sup>) Calcd. for:  $\text{C}_{31}\text{H}_{32}\text{OP}$  451.2191, found 451.2189.

**(*E*)-(2-methyl-1,3-diphenylallyl)diphenylphosphine oxide (3p)**

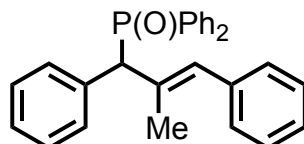

Following the general procedure, the reaction was conducted at 100 °C for 12h. **3p** was isolated as white solid. Mp: 226-229 °C.  $^1\text{H}$  NMR (400 MHz, *Chloroform-d*)  $\delta$  7.89 – 7.83 (m, 2H), 7.63 – 7.56 (m, 2H), 7.55 – 7.43 (m, 5H), 7.42 – 7.35 (m, 1H), 7.34 – 7.27 (m, 2H), 7.26 – 7.17 (m, 5H), 7.17 – 7.12 (m, 1H), 6.95 (d,  $J = 7.2$  Hz, 2H), 6.68 (s, 1H), 4.22 (d,  $J = 8.8$  Hz, 1H), 1.89 (s, 3H).  $^{13}\text{C}$  NMR (101 MHz, *Chloroform-d*)  $\delta = 137.70, 135.62$  (d,  $J_{\text{C-P}} = 4.6$  Hz),  $134.54$  (d,  $J_{\text{C-P}} = 5.8$  Hz),  $133.36$  (d,  $J_{\text{C-P}} = 26.5$  Hz),  $132.39$  (d,  $J_{\text{C-P}} = 24.8$  Hz),  $131.48$  (d,  $J_{\text{C-P}} = 2.7$  Hz),  $131.34, 131.26, 131.19, 131.10, 130.79$  (d,  $J_{\text{C-P}} = 9.2$  Hz),  $130.19, 130.12, 128.79, 128.42, 128.36, 128.30, 128.17, 127.89, 127.12, 126.33, 56.46$  (d,  $J_{\text{C-P}} = 66.6$  Hz),  $18.07$  (d,  $J_{\text{C-P}} = 4.8$  Hz).  $^{31}\text{P}$  NMR (162 MHz, *Chloroform-d*)  $\delta = 32.46$ . IR (KBr): 3052.01, 3022.26, 2918.71, 2851.81, 1647.61, 1275.80, 741.66, 722.09, 700.11. HRMS (ESI/[M+H]<sup>+</sup>) Calcd. for:  $\text{C}_{28}\text{H}_{26}\text{OP}$  409.1721, found 409.1712.

**(*E*)-(1-(benzo[d][1,3]dioxol-5-yl)-4,4-dimethylpent-1-en-3-yl)diphenylphosphine oxide (3q)**

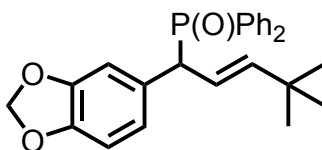

Following the general procedure, the reaction was conducted at 100 °C for 12h. **3q** was isolated as white solid. Mp: 246-248 °C. <sup>1</sup>H NMR (400 MHz, Chloroform-*d*) δ 7.84 – 7.78 (m, 2H), 7.65 – 7.58 (m, 2H), 7.52 – 7.38 (m, 4H), 7.36 – 7.30 (m, 2H), 6.90 (dd, *J* = 1.6, 1.6 Hz, 1H), 6.72 – 6.68 (m, 1H), 6.63 (d, *J* = 8.0 Hz, 1H), 5.88 (s, 2H), 5.71 – 5.59 (m, 1H), 5.34 (dd, *J* = 15.8, 4.3 Hz, 1H), 4.05 (dd, *J* = 9.3, 9.3 Hz, 1H), 0.79 (s, 9H). <sup>13</sup>C NMR (101 MHz, Chloroform-*D*) δ = 147.66, 147.00, 146.89, 146.57, 132.70, 132.28, 131.91, 131.82, 131.75, 131.56, 131.53, 131.50, 131.38, 131.32, 131.30, 130.18, 130.11, 128.35, 128.34, 128.24, 122.64, 122.58, 119.49, 119.43, 109.81, 109.75, 108.27, 108.25, 101.00, 52.08, 51.43, 33.28, 29.20, 29.18. <sup>13</sup>C NMR (101 MHz, Chloroform-*d*) δ 147.65 (d, *J* = 1.9 Hz), 146.94 (d, *J*<sub>C-P</sub> = 11.0 Hz), 146.57, 132.49 (d, *J*<sub>C-P</sub> = 42.2 Hz), 122.61 (d, *J*<sub>C-P</sub> = 6.7 Hz), 119.46 (d, *J*<sub>C-P</sub> = 6.4 Hz), 109.78 (d, *J*<sub>C-P</sub> = 5.3 Hz), 108.26 (d, *J*<sub>C-P</sub> = 1.9 Hz), 51.76 (d, *J*<sub>C-P</sub> = 65.7 Hz), 29.19 (d, *J*<sub>C-P</sub> = 1.8 Hz). <sup>31</sup>P NMR (162 MHz, Chloroform-*d*) δ = 32.31. IR (KBr): 3055.14, 3024.02, 2958.16, 2924.47, 1607.12, 1250.39, 812.61, 752.18, 719.58. HRMS (ESI/[M+H]<sup>+</sup>) Calcd. for: C<sub>26</sub>H<sub>28</sub>O<sub>3</sub>P 419.1776, found 419.1774.

**(*E*)-(1-(4-bromophenyl)-3-phenylallyl)diphenylphosphine oxide (3s) and (*E*)-(3-(4-bromophenyl)-1-phenylallyl)diphenylphosphine oxide (3s')**

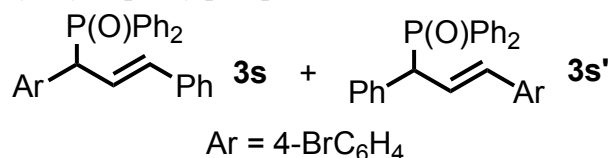

Following the general procedure, the reaction was conducted at 100 °C for 12h. A mixture of **3s** and **3s'** was isolated as white solid, Mp: 178-180 °C. (A trace amount of mixture **3s'**/**3s** = 9/1 was isolated through PTLC (Petroleum ether (bp: 60-90 °C)/ethyl acetate = 2:1) for five times, and **3s'** was selected as reference. Then we assign the pick for **3s** and **3s'** by combination of spectrum of DEPT-135 and **3s'** (<sup>1</sup>H NMR, <sup>13</sup>C NMR and <sup>31</sup>P NMR)). <sup>1</sup>H NMR (400 MHz, Chloroform-*d*, mixture of **3s** and **3s'**) δ 7.90 – 7.80 (m, 2H (**3s**) + 2H (**3s'**)), 7.65 – 7.52 (m, 2H (**3s**) + 2H (**3s'**)), 7.52 – 7.40 (m, 2H (**3s**) + 4H (**3s'**)), 7.40 – 7.27 (m, 7H (**3s**) + 4H (**3s'**)), 7.26 – 7.13 (m, 4H (**3s**) + 7H (**3s'**)), 7.07 – 7.01 (m, 2H (**3s**)), 6.63 – 6.54 (m, 1H (**3s**)), 6.54 – 6.46 (m, 1H (**3s'**)), 6.31 (dd, *J* = 15.8, 3.7 Hz, 1H (**3s**)), 6.23 (dd, *J* = 15.8, 3.9 Hz, 1H (**3s'**)), 4.37 (d, *J* = 9.3, 1H (**3s**)), 4.37 (d, *J* = 9.3, 1H (**3s'**)). <sup>13</sup>C NMR (101 MHz, Chloroform-*d*) δ = 136.54 (d, *J* = 2.2 Hz (**3s'**)), 135.71 (d, *J* = 6.5 Hz (**3s**)), 135.66 (d, *J* = 2.2 Hz (**3s**)), 135.17 (d, *J* = 5.9 Hz (**3s'**)), 134.93 (**3s'**), 134.82 (**3s'**), 133.33 (**3s**), 133.22 (**3s**), 132.05 (**3s'**), 131.86 (**3s'**), 131.83 (**3s'**), 131.75 (**3s'** + **3s**), 131.70 (**3s'** + **3s**), 131.62 (**3s**), 131.42 (**3s**), 131.36 (**3s'**), 131.33 (**3s**), 131.27 (**3s'**), 131.22 (**3s**), 131.18 (**3s'**), 131.12 (**3s'**), 131.08 (d, *J* = 9.8 Hz (**3s**)), 130.87 (d, *J* = 24.6 Hz (**3s'**)), 129.53 (d, *J* = 5.8 Hz (**3s**)), 128.75 (**3s**), 128.70 (**3s'**), 128.66 (**3s**), 128.59 (**3s'**), 128.54 (**3s'**), 128.39 (**3s**), 128.27 (**3s**), 127.99 (d, *J* = 1.4 Hz (**3s**)), 127.89 (**3s'**), 127.35 (d, *J* = 2.1 Hz (**3s**)), 126.47 (d, *J* = 1.4 Hz (**3s** + **3s'**)), 125.55 (d, *J* = 7.5 Hz (**3s**)), 124.03 (d, *J* = 7.0 Hz (**3s'**)), 121.50 (**3s**), 121.32 (**3s'**), 52.38 (d, *J* = 64.6 Hz (**3s**)), 51.64 (d, *J* = 64.7 Hz (**3s'**)). <sup>31</sup>P NMR (162 MHz, Chloroform-*d*, mixture of **3s** and **3s'** (**3s**/**3s'** = 1/1)) δ = 32.18 (**3s**), 31.82 (**3s'**). HRMS (ESI/[M+H]<sup>+</sup>) Calcd. for: C<sub>27</sub>H<sub>23</sub>BrOP 473.0670, found 473.0674.

**((2*E*,4*E*)-1,5-diphenylpenta-2,4-dien-1-yl)diphenylphosphine oxide (3t) and ((1*E*,4*E*)-1,5-diphenylpenta-1,4-dien-3-yl)diphenylphosphine oxide (3t')**

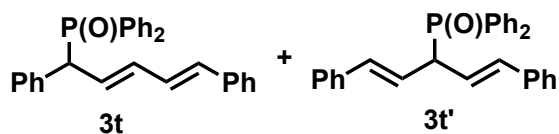

Following the general procedure, the reaction was conducted at 30 °C for 12h. A mixture of **3t** and **3t'** (**3t/3t'** = 2/1) was isolated as white solid. Mp: 181-183 °C. Then the two isomer can be further separated by carefully PTLC (Petroleum ether (bp: 60-90 °C)/ethyl acetate = 2:1) for five times, 10 mg **3t'** and 12 mg pure **3t** was obtained to check the NMR. For **3t**:  $^1\text{H}$  NMR (400 MHz, Chloroform-*d*)  $\delta$  7.90 – 7.80 (m, 2H), 7.57 – 7.43 (m, 5H), 7.40 – 7.33 (m, 1H), 7.32 – 7.24 (m, 8H), 7.23 – 7.13 (m, 4H), 6.68 (dd,  $J$  = 15.6, 9.7 Hz, 1H), 6.32 (dd,  $J$  = 15.6, 1.6 Hz, 1H), 6.24 – 6.03 (m, 2H), 4.30 (dd,  $J$  = 10.2, 8.3 Hz, 1H).  $^{13}\text{C}$  NMR (101 MHz, Chloroform-*d*)  $\delta$  = 137.11 (d,  $J$  = 1.4 Hz), 135.82 (d,  $J$  = 6.2 Hz), 134.99, 134.87, 132.51, 132.13 (d,  $J$  = 33.7 Hz), 131.94, 131.81, 131.73, 131.61, 131.32, 131.00, 129.57, 129.51, 128.66, 128.53, 128.36 (d,  $J$  = 3.6 Hz), 128.30, 128.22, 128.19, 127.66, 127.22 (d,  $J$  = 2.4 Hz), 126.40, 52.24 (d,  $J$  = 65.3 Hz).  $^{31}\text{P}$  NMR (162 MHz, Chloroform-*d*)  $\delta$  = 32.00. For **3t'**:  $^1\text{H}$  NMR (400 MHz, Chloroform-*d*)  $\delta$  7.86 – 7.84 (m, 1H), 7.84 – 7.81 (m, 2H), 7.81 – 7.79 (m, 1H), 7.54 – 7.48 (m, 2H), 7.47 – 7.40 (m, 4H), 7.27 – 7.23 (m, 8H), 7.22 – 7.16 (m, 2H), 6.47 – 6.31 (m, 4H), 4.18 – 4.06 (m, 1H).  $^{13}\text{C}$  NMR (101 MHz, Chloroform-*d*)  $\delta$  = 136.82 (d,  $J$  = 2.5 Hz), 134.69, 134.58, 132.02, 131.91, 131.76, 131.68, 130.95, 128.64, 128.53, 127.79, 126.46, 123.15, 123.07, 49.90 (d,  $J$  = 66.0 Hz).  $^{31}\text{P}$  NMR (162 MHz, Chloroform-*d*)  $\delta$  = 32.28. HRMS (ESI/[M+H] $^+$ ) Calcd. for: C<sub>29</sub>H<sub>26</sub>OP 427.1721, found 427.1721.

**(E)-(1,3-diphenylallyl)bis(4-fluorophenyl)phosphine oxide (3u)**

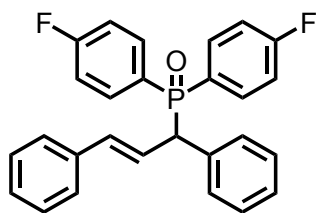

Following the general procedure, the reaction was conducted at 100 °C for 12h. **3u** was isolated as white solid. Mp: 194-196 °C.  $^1\text{H}$  NMR (400 MHz, Chloroform-*d*)  $\delta$  = 7.92 – 7.77 (m, 2H), 7.61 – 7.46 (m, 2H), 7.38 – 7.28 (m, 2H), 7.28 – 7.12 (m, 10H), 7.04 – 6.95 (m, 2H), 6.71 – 6.46 (m, 1H), 6.35 (dd,  $J$  = 15.8, 3.6 Hz, 1H), 4.33 (dd,  $J$  = 9.3, 9.3 Hz, 1H).  $^{13}\text{C}$  NMR (101 MHz, Chloroform-*d*)  $\delta$  = 164.99 (dd,  $J_{\text{C-P,C-F}}$  = 253.6, 3.1 Hz), 164.76 (dd,  $J_{\text{C-P,C-F}}$  = 253.5, 3.1 Hz), 136.44 (d,  $J_{\text{C-P}}$  = 2.4 Hz), 135.56 (d,  $J_{\text{C-P}}$  = 5.9 Hz), 134.77, 134.65, 134.23, 134.14, 134.05, 133.84, 133.74, 133.65, 129.36 (d,  $J$  = 5.8 Hz), 128.73, 128.71, 128.52, 127.90 (d,  $J_{\text{C-P}}$  = 33.4 Hz), 127.83, 127.38 (d,  $J_{\text{C-P}}$  = 2.2 Hz), 126.92 (d,  $J_{\text{C-P}}$  = 31.1 Hz), 126.39, 124.07 (d,  $J_{\text{C-P}}$  = 7.3 Hz), 116.00, 115.65, 52.60 (d,  $J_{\text{C-P}}$  = 66.4 Hz).  $^{31}\text{P}$  NMR (162 MHz, Chloroform-*d*)  $\delta$  = 30.32.  $^{19}\text{F}$  NMR (376 MHz, Chloroform-*d*)  $\delta$  = -106.42, -106.67. IR (KBr): 3059.78, 3027.91, 3004.30, 2955.54, 2869.01, 1670.10, 1275.42, 748.44, 724.31. HRMS (ESI/[M+H] $^+$ ) Calcd. for: C<sub>27</sub>H<sub>22</sub>F<sub>2</sub>OP 431.1376, found 431.1374.

**(E)-(1,3-diphenylallyl)di-p-tolylphosphine oxide (3v)**

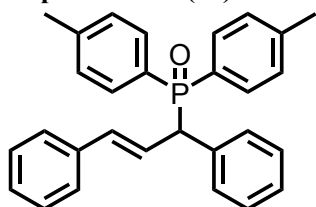

Following the general procedure, the reaction was conducted at 100 °C for 12h. **3v** was isolated as white solid. Mp: 219-220 °C.  $^1\text{H}$  NMR (400 MHz, Chloroform-*d*)  $\delta$  = 7.75 – 7.67 (m, 2H), 7.50 – 7.40 (m, 2H), 7.39 – 7.31 (m, 2H), 7.27 – 7.19 (m, 8H), 7.18 – 7.13 (m, 2H), 7.12 – 7.03 (m, 2H), 6.67 – 6.53 (m, 1H), 6.33 (dd,  $J$  = 15.8, 3.5 Hz, 1H), 4.34 (dd,  $J$  = 9.6, 9.6 Hz, 1H), 2.35 (s, 3H), 2.27 (s, 3H).

$^{13}\text{C}$  NMR (101 MHz, *Chloroform-d*)  $\delta$  = 142.08 (d,  $J_{\text{C-P}}$  = 2.6 Hz), 141.80 (d,  $J_{\text{C-P}}$  = 2.6 Hz), 136.84 (d,  $J_{\text{C-P}}$  = 2.2 Hz), 136.25 (d,  $J_{\text{C-P}}$  = 5.8 Hz), 134.16 (d,  $J_{\text{C-P}}$  = 11.3 Hz), 131.76, 131.67, 131.39, 131.30, 129.52 (d,  $J_{\text{C-P}}$  = 5.6 Hz), 129.28, 129.24, 129.12, 128.98, 128.86, 128.52, 128.41, 127.90, 127.53, 127.02 (d,  $J_{\text{C-P}}$  = 2.1 Hz), 126.40, 125.00 (d,  $J_{\text{C-P}}$  = 7.0 Hz), 52.47 (d,  $J_{\text{C-P}}$  = 65.0 Hz), 21.62, 21.55.  $^{31}\text{P}$  NMR (162 MHz, *Chloroform-d*)  $\delta$  = 31.72. IR (KBr): 3080.97, 3057.63, 3025.30, 3004.65, 2988.95, 2919.17, 1656.75, 1275.53, 747.87, 721.95. HRMS (ESI/[M+H] $^{+}$ ) Calcd. for:  $\text{C}_{29}\text{H}_{28}\text{OP}$  423.1878, found 423.1878.

**(*E*)-bis(4-(*tert*-butyl)phenyl)(1,3-diphenylallyl)phosphine oxide (3w)**

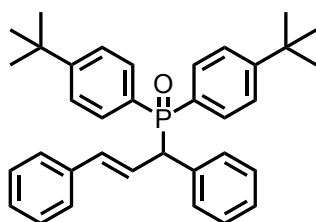

Following the general procedure, the reaction was conducted at 100 °C for 12h. **3w** was isolated as white solid. Mp: 248-249 °C.  $^1\text{H}$  NMR (400 MHz, *Chloroform-d*)  $\delta$  = 7.80 – 7.66 (m, 2H), 7.54 – 7.42 (m, 4H), 7.38 – 7.27 (m, 4H), 7.25 – 7.12 (m, 8H), 6.68 – 6.48 (m, 1H), 6.34 – 6.17 (m, 1H), 4.34 (dd,  $J$  = 9.4, 9.4 Hz, 1H), 1.30 (s, 9H), 1.24 (s, 9H).  $^{13}\text{C}$  NMR (101 MHz, *Chloroform-d*)  $\delta$  = 155.02 (d,  $J_{\text{C-P}}$  = 2.8 Hz), 154.79 (d,  $J_{\text{C-P}}$  = 2.8 Hz), 136.92, 136.35 (d,  $J_{\text{C-P}}$  = 5.8 Hz), 134.15 (d,  $J_{\text{C-P}}$  = 11.2 Hz), 131.69, 131.60, 131.31, 131.22, 129.52 (d,  $J_{\text{C-P}}$  = 5.7 Hz), 129.13 (d,  $J_{\text{C-P}}$  = 34.2 Hz), 128.46, 128.38, 128.15 (d,  $J_{\text{C-P}}$  = 34.0 Hz), 127.48, 126.98, 126.37, 125.44, 125.32, 125.20, 125.15, 125.08, 52.59 (d,  $J_{\text{C-P}}$  = 64.9 Hz), 34.98, 34.88, 31.15, 31.08.  $^{31}\text{P}$  NMR (162 MHz, *Chloroform-d*)  $\delta$  = 31.66. IR (KBr): 3080.80, 3060.65, 3026.27, 2867.81, 1663.72, 1268.66, 825.48, 745.04, 699.51. HRMS (ESI/[M+H] $^{+}$ ) Calcd. for:  $\text{C}_{35}\text{H}_{40}\text{OP}$  507.2817 found 507.2817.

**(*E*)-(1,3-diphenylallyl)bis(4-methoxyphenyl)phosphine oxide (3x)**

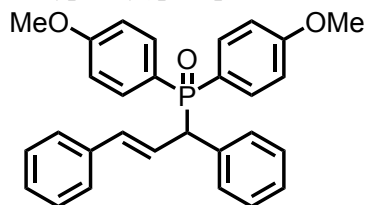

Following the general procedure, the reaction was conducted at 100 °C for 12h. **3x** was isolated as white solid. Mp: 223-226 °C.  $^1\text{H}$  NMR (400 MHz, *Chloroform-d*)  $\delta$  = 7.78 – 7.67 (m, 2H), 7.52 – 7.40 (m, 2H), 7.38 – 7.28 (m, 2H), 7.28 – 7.11 (m, 8H), 7.02 – 6.91 (m, 2H), 6.85 – 6.73 (m, 2H), 6.65 – 6.50 (m, 1H), 6.34 (dd,  $J$  = 3.8, 0.9 Hz, 1H), 4.29 (dd,  $J$  = 9.6, 9.6 Hz, 1H), 3.81 (s, 3H), 3.76 (s, 3H).  $^{13}\text{C}$  NMR (101 MHz, *Chloroform-d*)  $\delta$  = 162.21 (d,  $J_{\text{C-P}}$  = 2.9 Hz), 161.97 (d,  $J_{\text{C-P}}$  = 2.8 Hz), 136.83, 136.34 (d,  $J_{\text{C-P}}$  = 5.8 Hz), 134.08 (d,  $J_{\text{C-P}}$  = 11.3 Hz), 133.61, 133.51, 133.24, 133.14, 129.51, 129.45, 128.52, 128.42, 127.52, 127.02, 126.39, 126.38, 125.09 (d,  $J_{\text{C-P}}$  = 7.1 Hz), 123.61 (d,  $J_{\text{C-P}}$  = 56.5 Hz), 122.58 (d,  $J_{\text{C-P}}$  = 56.6 Hz), 114.01, 113.89, 113.76, 113.63, 55.30, 55.22, 52.89 (d,  $J$  = 65.8 Hz).  $^{31}\text{P}$  NMR (162 MHz, *Chloroform-d*)  $\delta$  = 31.43. IR (KBr): 3058.34, 3025.82, 2962.21, 2905.86, 1645.20, 1251.56, 825.00, 801.23, 726.66, 728.87. HRMS (ESI/[M+H] $^{+}$ ) Calcd. for:  $\text{C}_{29}\text{H}_{28}\text{O}_3\text{P}$  455.1776, found 455.1776.

**(*E*)-bis(3,5-dimethylphenyl)(1,3-diphenylallyl)phosphine oxide (3y)**

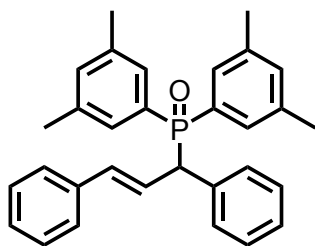

Following the general procedure, the reaction was conducted at 100 °C for 12h. **3y** was isolated as white solid. Mp: 209-211 °C. <sup>1</sup>H NMR (400 MHz, Chloroform-*d*)  $\delta$  = 7.47 – 7.40 (m, 2H), 7.39 – 7.33 (m, 2H), 7.27 – 7.19 (m, 6H), 7.19 – 7.13 (m, 4H), 7.10 (s, 1H), 6.99 (s, 1H), 6.64 – 6.50 (m, 1H), 6.30 (dd,  $J$  = 15.8, 3.8 Hz, 1H), 4.33 (dd,  $J$  = 9.5, 9.5 Hz, 1H), 2.30 (s, 6H), 2.20 (s, 6H). <sup>13</sup>C NMR (101 MHz, Chloroform-*d*)  $\delta$  = 138.02, 137.90, 137.75, 137.62, 136.87 (d,  $J_{C-P}$  = 2.5 Hz), 136.26 (d,  $J_{C-P}$  = 6.0 Hz), 134.26, 134.15, 133.43 (d,  $J_{C-P}$  = 2.9 Hz), 133.17 (d,  $J_{C-P}$  = 2.9 Hz), 131.84 (d,  $J_{C-P}$  = 27.4 Hz), 130.89 (d,  $J_{C-P}$  = 27.6 Hz), 129.58, 129.53, 129.43, 129.34, 129.06, 128.98, 128.46, 128.37, 127.48, 126.99 (d,  $J_{C-P}$  = 2.4 Hz), 126.39, 125.03 (d,  $J_{C-P}$  = 7.1 Hz), 52.33 (d,  $J_{C-P}$  = 64.3 Hz), 21.37, 21.25. <sup>31</sup>P NMR (162 MHz, Chloroform-*d*)  $\delta$  = 32.03. IR (KBr): 3057.14, 3024.09, 2954.84, 2920.54, 2853.57, 1645.20, 1274.09, 750.00, 727.98, 699.89. HRMS (ESI/[M+H]<sup>+</sup>) Calcd. for: C<sub>31</sub>H<sub>32</sub>OP 451.2191, found 451.2193.

**(*E*)-(1,3-diphenylallyl)di-m-tolylphosphine oxide (3z)**

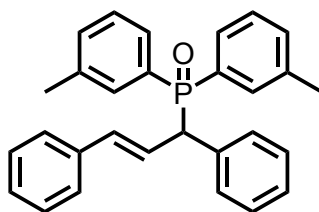

Following the general procedure, the reaction was conducted at 100 °C for 12h. **3z** was isolated as white solid. Mp: 171-173 °C. <sup>1</sup>H NMR (400 MHz, Chloroform-*d*)  $\delta$  7.69 (d,  $J$  = 11.4 Hz, 1H), 7.59 (dd,  $J$  = 8.4, 8.4 Hz, 1H), 7.41 – 7.27 (m, 6H), 7.25 – 7.20 (m, 6H), 7.20 – 7.14 (m, 4H), 6.63 – 6.51 (m, 1H), 6.30 (dd,  $J$  = 15.7, 3.7 Hz, 1H), 4.34 (dd,  $J$  = 9.1, 9.1 Hz, 1H), 2.34 (s, 3H), 2.23 (s, 3H). <sup>13</sup>C NMR (101 MHz, Chloroform-*d*)  $\delta$  = 138.46, 138.35, 138.18, 138.07, 136.85 (d,  $J_{C-P}$  = 2.5 Hz), 136.13 (d,  $J_{C-P}$  = 5.9 Hz), 134.45, 134.34, 132.71, 132.63, 132.38, 132.28, 132.20, 131.96 (d,  $J_{C-P}$  = 31.9 Hz), 131.00 (d,  $J_{C-P}$  = 31.9 Hz), 129.61, 129.55, 128.59, 128.48, 128.35, 128.26, 128.17, 128.08, 127.95, 127.63, 127.15 (d,  $J_{C-P}$  = 2.4 Hz), 126.48, 124.84 (d,  $J_{C-P}$  = 7.3 Hz), 52.44 (d,  $J_{C-P}$  = 64.9 Hz), 21.52, 21.40. <sup>31</sup>P NMR (162 MHz, Chloroform-*d*)  $\delta$  = 32.52. IR (KBr): 3024.29, 2917.75, 2850.05, 1645.20, 1275.85, 747.41, 732.91. HRMS (ESI/[M+H]<sup>+</sup>) Calcd. for: C<sub>29</sub>H<sub>28</sub>OP 423.1878, found 423.1862.

**(*E*)-(1,3-diphenylallyl)di-o-tolylphosphine oxide (3aa)**

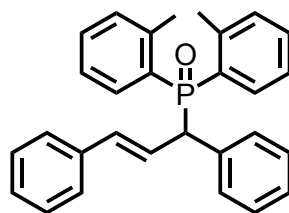

Following the general procedure, the reaction was conducted at 100 °C for 12h. **3aa** was isolated as white solid. Mp: 170-173 °C. <sup>1</sup>H NMR (400 MHz, Chloroform-*d*)  $\delta$  = 7.84 – 7.72 (m, 1H), 7.51 – 7.31 (m, 4H), 7.31 – 7.13 (m, 11H), 7.09 – 6.96 (m, 2H), 6.87 – 6.70 (m, 1H), 6.54 – 6.44 (m, 1H), 4.52 (dd,

$J = 8.6, 8.6$  Hz, 1H), 2.37 (s, 3H), 2.19 (s, 3H).  $^{13}\text{C}$  NMR (101 MHz, Chloroform- $d$ )  $\delta = 143.15$  (d,  $J_{\text{C-P}} = 7.2$  Hz), 142.65 (d,  $J_{\text{C-P}} = 7.7$  Hz), 137.09 (d,  $J_{\text{C-P}} = 5.4$  Hz), 136.96 (d,  $J_{\text{C-P}} = 1.6$  Hz), 134.31, 134.20, 132.16, 132.04, 132.01, 131.94, 131.70, 131.64, 131.61, 131.59, 131.41, 131.38, 130.88 (d,  $J_{\text{C-P}} = 38.8$  Hz), 129.74, 129.69, 128.55, 127.70, 127.09 (d,  $J_{\text{C-P}} = 2.2$  Hz), 126.51, 125.81 (d,  $J_{\text{C-P}} = 6.3$  Hz), 125.35 (d,  $J_{\text{C-P}} = 11.8$  Hz), 125.14 (d,  $J_{\text{C-P}} = 12.1$  Hz), 50.80 (d,  $J_{\text{C-P}} = 65.7$  Hz), 21.43 (d,  $J_{\text{C-P}} = 3.8$  Hz), 21.13 (d,  $J_{\text{C-P}} = 3.8$  Hz).  $^{31}\text{P}$  NMR (162 MHz, Chloroform- $d$ )  $\delta = 35.66$ . HRMS (ESI/[M+H] $^{+}$ ) Calcd. for:  $\text{C}_{29}\text{H}_{27}\text{OP}$  423.1878, found 423.1865.

**(*E*)-(1,3-diphenylallyl)bis(2-methoxyphenyl)phosphine oxide (3ab)**

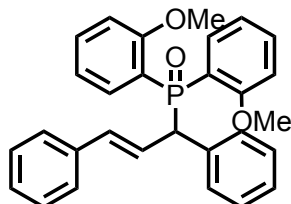

Following the general procedure, the reaction was conducted at 100 °C for 12h. **3ab** was isolated as white solid. Mp: 181-182 °C.  $^1\text{H}$  NMR (400 MHz, Chloroform- $d$ )  $\delta$  7.86 (dd,  $J = 12.8, 7.6$  Hz, 1H), 7.61 (dd,  $J = 13.0, 7.6$  Hz, 1H), 7.45 (d,  $J = 7.6$  Hz, 2H), 7.38 (dd,  $J = 8.4, 8.4$  Hz, 1H), 7.32 – 7.03 (m, 9H), 6.97 (dd,  $J = 7.5, 7.5$  Hz, 1H), 6.87 – 6.64 (m, 4H), 6.46 (dd,  $J = 15.8, 2.6$  Hz, 1H), 4.97 (dd,  $J_{\text{H-P}} = 10.6, 10.6$  Hz, 1H), 3.69 (s, 3H), 3.61 (s, 3H).  $^{13}\text{C}$  NMR (101 MHz, Chloroform- $d$ )  $\delta = 160.35$  (d,  $J_{\text{C-P}} = 3.4$  Hz), 159.95 (d,  $J_{\text{C-P}} = 3.4$  Hz), 138.09 (d,  $J_{\text{C-P}} = 5.7$  Hz), 137.45 (d,  $J_{\text{C-P}} = 2.0$  Hz), 134.62 (d,  $J_{\text{C-P}} = 6.2$  Hz), 134.30 (d,  $J_{\text{C-P}} = 6.2$  Hz), 133.35, 133.16, 132.77 (d,  $J_{\text{C-P}} = 12.5$  Hz), 129.46, 129.40, 128.46, 128.26, 127.32, 127.19 (d,  $J_{\text{C-P}} = 6.7$  Hz), 126.70, 126.68, 126.42, 126.41, 121.80 (d,  $J = 13.7$  Hz), 120.83 (d,  $J_{\text{C-P}} = 14.1$  Hz), 120.76 (d,  $J_{\text{C-P}} = 11.1$  Hz), 120.45 (d,  $J_{\text{C-P}} = 11.1$  Hz), 110.98 (d,  $J_{\text{C-P}} = 6.8$  Hz), 110.51 (d,  $J_{\text{C-P}} = 6.8$  Hz), 55.51, 55.27, 51.09 (d,  $J_{\text{C-P}} = 69.4$  Hz).  $^{31}\text{P}$  NMR (162 MHz, Chloroform- $d$ )  $\delta = 33.22$ . IR (KBr): 3060.19, 3024.40, 2966.46, 2937.53, 1645.32, 1274.32, 800.76, 749.01, 726.76. HRMS (ESI/[M+H] $^{+}$ ) Calcd. for:  $\text{C}_{29}\text{H}_{28}\text{O}_3\text{P}$  455.1776, found 455.1771.

**(*E*)-(1,3-diphenylallyl)bis(3-methoxyphenyl)phosphine oxide (3ac)**

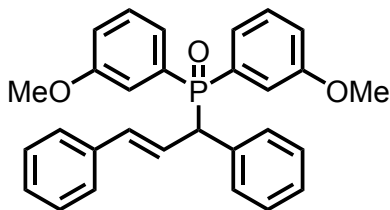

Following the general procedure, the reaction was conducted at 100 °C for 12h. **3ac** was isolated as white solid. Mp: 173-175 °C.  $^1\text{H}$  NMR (400 MHz, Chloroform- $d$ )  $\delta$  7.45 – 7.34 (m, 5H), 7.26 – 7.15 (m, 9H), 7.14 – 7.00 (m, 3H), 6.95 – 6.88 (m, 1H), 6.66 – 6.55 (m, 1H), 6.34 (dd,  $J = 15.8, 3.8$  Hz, 1H), 4.33 (dd,  $J = 9.4, 9.4$  Hz, 1H), 3.74 (s, 3H), 3.63 (s, 3H).  $^{13}\text{C}$  NMR (101 MHz, Chloroform- $d$ )  $\delta = 159.63$  (d,  $J_{\text{C-P}} = 14.0$  Hz), 159.32 (d,  $J_{\text{C-P}} = 14.3$  Hz), 136.78 (d,  $J_{\text{C-P}} = 2.8$  Hz), 136.11 (d,  $J_{\text{C-P}} = 6.1$  Hz), 134.54, 134.43, 133.45 (d,  $J_{\text{C-P}} = 39.0$  Hz), 132.49 (d,  $J_{\text{C-P}} = 39.0$  Hz), 129.74, 129.59, 129.46, 129.33, 128.70, 128.54, 127.74, 127.25 (d,  $J_{\text{C-P}} = 2.7$  Hz), 126.51, 124.68 (d,  $J_{\text{C-P}} = 7.5$  Hz), 123.72, 123.63, 123.47, 123.37, 118.41 (d,  $J_{\text{C-P}} = 3.1$  Hz), 118.33 (d,  $J_{\text{C-P}} = 3.0$  Hz), 116.72 (d,  $J_{\text{C-P}} = 9.1$  Hz), 116.05 (d,  $J_{\text{C-P}} = 9.3$  Hz), 55.49, 55.39, 52.51 (d,  $J_{\text{C-P}} = 65.1$  Hz).  $^{31}\text{P}$  NMR (162 MHz, Chloroform- $d$ )  $\delta = 32.46$ . IR (KBr): 3057.44, 3021.59, 2959.12, 2919.49, 1647.15, 1286.03, 749.08, 725.56. HRMS (ESI/[M+H] $^{+}$ ) Calcd. for:  $\text{C}_{29}\text{H}_{28}\text{O}_3\text{P}$  455.1776, found 455.1786.

**(E)-(1,3-diphenylallyl)di(naphthalen-2-yl)phosphine oxide (3ad)**

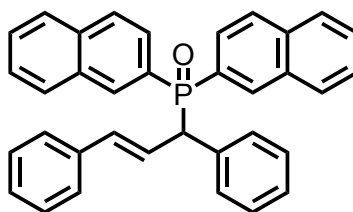

Following the general procedure, the reaction was conducted at 100 °C for 12h. **3ad** was isolated as white solid. Mp: 217-218 °C. <sup>1</sup>H NMR (400 MHz, Chloroform-*d*) δ 8.53 (d, *J* = 13.0 Hz, 1H), 8.22 (d, *J* = 13.3 Hz, 1H), 7.98 – 7.84 (m, 4H), 7.83 – 7.74 (m, 3H), 7.70 – 7.63 (m, 1H), 7.63 – 7.41 (m, 6H), 7.27 – 7.11 (m, 8H), 6.79 – 6.66 (m, 1H), 6.45 (dd, *J* = 15.7, 3.8 Hz, 1H), 4.67 (dd, *J* = 9.4, 9.4 Hz, 1H). <sup>13</sup>C NMR (101 MHz, Chloroform-*d*) δ = 136.75 (d, *J*<sub>C-P</sub> = 2.4 Hz), 136.08 (d, *J*<sub>C-P</sub> = 5.8 Hz), 134.74, 134.62, 134.54, 134.34, 134.27, 133.83, 133.75, 132.70 (d, *J*<sub>C-P</sub> = 12.5 Hz), 132.49 (d, *J*<sub>C-P</sub> = 12.6 Hz), 129.55 (d, *J*<sub>C-P</sub> = 35.0 Hz), 129.70, 129.65, 129.12, 129.01, 128.80, 128.59 (d, *J*<sub>C-P</sub> = 35.1 Hz), 128.53, 128.35, 128.24, 128.16, 128.10, 127.98, 127.92, 127.83, 127.74, 127.36 (d, *J*<sub>C-P</sub> = 2.5 Hz), 127.04, 126.87, 126.53, 126.44 (d, *J*<sub>C-P</sub> = 9.7 Hz), 126.23 (d, *J*<sub>C-P</sub> = 9.7 Hz), 124.75 (d, *J*<sub>C-P</sub> = 7.2 Hz), 52.37 (d, *J*<sub>C-P</sub> = 65.0 Hz). <sup>31</sup>P NMR (162 MHz, Chloroform-*d*) δ = 32.29. IR (KBr): 3054.09, 3022.17, 2913.91, 1624.80, 1271.41, 859.51, 819.83, 743.50, 710.17. HRMS (ESI/[M+H]<sup>+</sup>) Calcd. for: C<sub>35</sub>H<sub>28</sub>OP 495.1878, found 495.1877.

**(E)-(1,3-diphenylallyl)di(naphthalen-1-yl)phosphine oxide (3ae)**

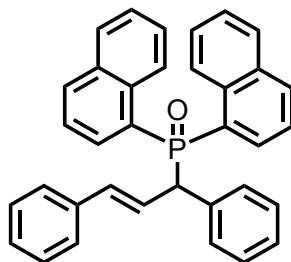

Following the general procedure, the reaction was conducted at 100 °C for 12h. **3ae** was isolated as white solid. Mp: 246-248 °C. <sup>1</sup>H NMR (400 MHz, Chloroform-*d*) δ 8.76 (d, *J* = 8.5 Hz, 1H), 8.59 (d, *J* = 8.5 Hz, 1H), 8.13 (dd, *J* = 14.3, 7.1 Hz, 1H), 7.95 (d, *J* = 8.2 Hz, 1H), 7.88 – 7.76 (m, 3H), 7.73 (d, *J* = 8.2 Hz, 1H), 7.47 (dd, *J* = 6.8, 6.8 Hz, 1H), 7.41 – 7.25 (m, 7H), 7.25 – 7.02 (m, 8H), 6.83 – 6.72 (m, 1H), 6.38 (dd, *J* = 15.7, 3.8 Hz, 1H), 4.78 (dd, *J* = 9.0, 9.0 Hz, 1H). <sup>13</sup>C NMR (101 MHz, Chloroform-*d*) δ = 136.95 (d, *J*<sub>C-P</sub> = 5.7 Hz), 136.84 (d, *J*<sub>C-P</sub> = 2.4 Hz), 134.40, 134.26 (d, *J*<sub>C-P</sub> = 7.6 Hz), 134.03, 133.98 (d, *J*<sub>C-P</sub> = 9.0 Hz), 133.96 (d, *J*<sub>C-P</sub> = 7.8 Hz), 133.70, 133.61, 133.12 (d, *J*<sub>C-P</sub> = 3.4 Hz), 132.88 (d, *J*<sub>C-P</sub> = 3.3 Hz), 132.18 (d, *J*<sub>C-P</sub> = 2.4 Hz), 132.08 (d, *J*<sub>C-P</sub> = 2.4 Hz), 130.03 (d, *J*<sub>C-P</sub> = 22.7 Hz), 129.73, 129.68, 129.10 (d, *J*<sub>C-P</sub> = 23.2 Hz), 128.88, 128.70, 128.55, 128.43, 127.64, 127.30, 127.17, 127.08, 126.67 (d, *J*<sub>C-P</sub> = 4.8 Hz), 126.50, 126.48, 126.34, 126.16, 125.84 (d, *J*<sub>C-P</sub> = 6.6 Hz), 124.40 (d, *J*<sub>C-P</sub> = 13.5 Hz), 124.22 (d, *J*<sub>C-P</sub> = 13.6 Hz), 52.06 (d, *J*<sub>C-P</sub> = 66.9 Hz). <sup>31</sup>P NMR (162 MHz, Chloroform-*d*) δ = 36.68. IR (KBr): 3078.68, 3024.10, 2921.02, 2880.94, 1641.60, 1274.95, 831.53, 749.63, 699.15. HRMS (ESI/[M+H]<sup>+</sup>) Calcd. for: C<sub>35</sub>H<sub>28</sub>OP 495.1878, found 495.1880.

**(E)-6-(1,3-diphenylallyl)-6H-dibenzo[c,e][1,2]oxaphosphinine 6-oxide (3af) (diastereoisomers)**

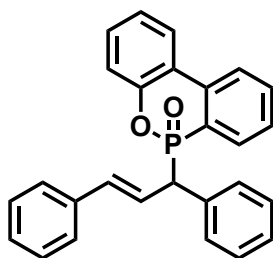

Following the general procedure, the reaction was conducted at 100 °C for 12h. **3af** was isolated as white solid. Mp: 163-166 °C. Then the two isomer can be further separated by carefully PTLC (Petroleum ether (bp: 60-90 °C)/ethyl acetate = 2:1) for five times, one of the pure isomer was obtained in 6 mg and the NMR was checked and set as reference to assign picks of this two isomer. <sup>1</sup>H NMR (400 MHz, Chloroform-*d*) δ 8.00 – 7.88 (m, 2H), 7.78 (dd, *J* = 11.8, 7.5 Hz, 1H), 7.73 – 7.64 (m, 1H), 7.40 (td, *J* = 7.5, 3.0 Hz, 1H), 7.35 – 7.20 (m, 10H), 7.19 – 7.16 (m, 2H), 6.98 (dd, *J* = 8.1, 1.2 Hz, 1H), 6.47 (ddd, *J* = 16.3, 9.6, 7.2 Hz, 1H), 6.22 (dd, *J* = 15.7, 4.8 Hz, 1H), 4.01 (dd, *J* = 16.2, 9.5 Hz, 1H). <sup>13</sup>C NMR (101 MHz, Chloroform-*d*) δ = 150.06 (d, *J* = 8.2 Hz), 136.58, 136.31, 135.46, 135.32, 134.50, 133.74, 132.58 (d, *J* = 8.3 Hz), 130.89, 129.30, 128.91, 128.66, 128.27, 128.15, 128.04, 127.72, 126.57, 125.33, 124.72, 124.08, 123.88, 123.78, 122.67, 120.82 (d, *J* = 6.6 Hz), 51.77 (d, *J* = 86.8 Hz). <sup>31</sup>P NMR (162 MHz, Chloroform-*d*) δ = 33.42. Another diastereoisomer: <sup>1</sup>H NMR (400 MHz, Chloroform-*d*) δ 7.93 – 7.83 (m, 2H), 7.71 – 7.58 (m, 1H), 7.49 – 7.35 (m, 2H), 7.31 – 7.25 (m, 7H), 7.23 – 7.19 (m, 6H), 6.64 – 6.51 (m, 1H), 6.46 – 6.35 (m, 1H), 4.01 (dd, *J* = 16.4, 9.0 Hz, 1H). <sup>13</sup>C NMR (101 MHz, Chloroform-*d*) δ = 149.87 (d, *J* = 3.1 Hz), 136.49, 136.20, 134.78, 134.66, 134.40, 133.58, 131.76 (d, *J* = 8.7 Hz), 130.82, 129.35, 128.80, 128.64, 128.18, 128.05, 127.96, 127.66, 124.71, 124.61, 123.94, 123.61, 123.51, 122.92, 122.68, 122.55, 122.49, 120.57 (d, *J* = 6.6 Hz), 51.74 (d, *J* = 86.8 Hz). <sup>31</sup>P NMR (162 MHz, Chloroform-*d*) δ = 34.06. IR (KBr): 3058.03, 3025.09, 2961.19, 2912.32, 1639.70, 1275.98, 753.85, 714.91. HRMS (ESI/[M+H]<sup>+</sup>) Calcd. for: C<sub>27</sub>H<sub>22</sub>O<sub>2</sub>P 409.1357, found 409.1348.

With the attempt the get more information of this reaction, other P-H species (such as diethyl (dibutyl or phenyl) phosphite etc.) was investigated. Unfortunately, under the identity condition, no desired products can be isolated.



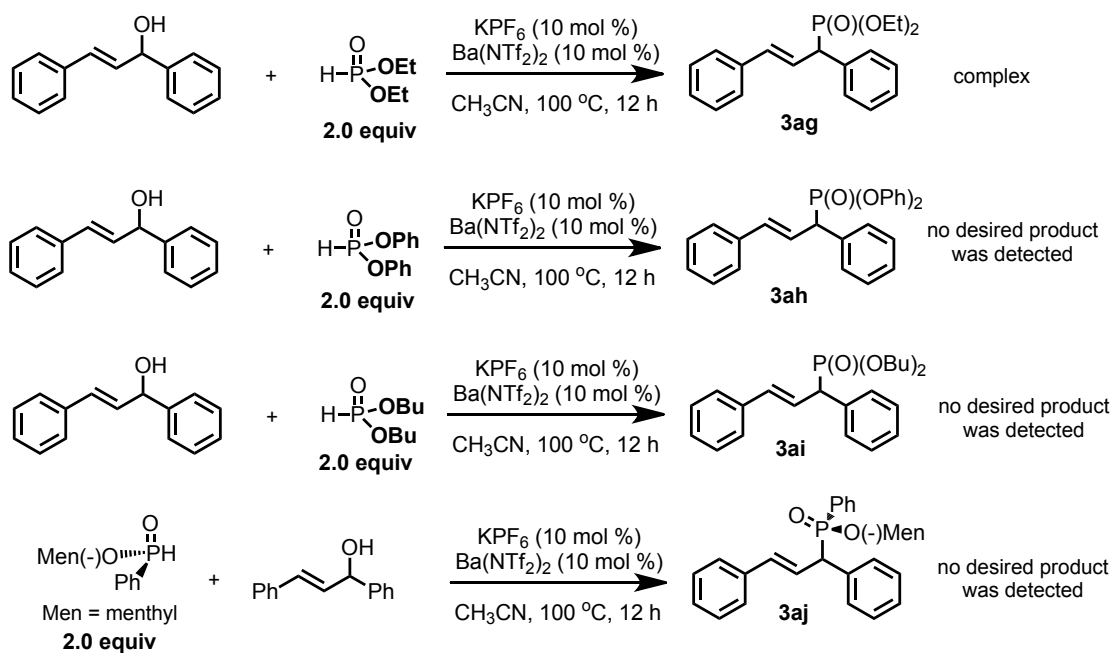

## 5. References

- [1] C. C. Chen, J. Waser, *Chem. Commun.* **2014**, 50, 12923.
- [2] a) Liu, S.; Liebeskind, L. S. *J. Am. Chem. Soc.* **2008**, 130, 6918; b) Fukuzawa, S.; Fujinami, T.; Yamauchi, S.; Sakai, S. *J. Chem. Soc. Perkin. Trans.* **1986**, 1, 1929.
- [3] L. Zhang, W. Liu, X. Zhao, *Eur. J. Org. Chem.* **2014**, 31, 6846-6849.

**<sup>1</sup>H NMR spectrum of compound 3a in CDCl<sub>3</sub>.**

**Chemical structure of 3a:** c1ccccc1C(P(=O)(c2ccccc2)C=Cc3ccccc3)

**Peak list (ppm):** 7.88, 7.86, 7.86, 7.85, 7.84, 7.83, 7.60, 7.59, 7.58, 7.58, 7.56, 7.56, 7.49, 7.48, 7.47, 7.46, 7.45, 7.44, 7.44, 7.37, 7.35, 7.35, 7.34, 7.34, 7.30, 7.30, 7.29, 7.28, 7.28, 7.28, 7.27, 7.26, 7.26, 7.24, 7.23, 7.23, 7.21, 7.20, 7.20, 7.19, 7.17, 7.15, 7.14, 6.61, 6.59, 6.57, 6.57, 6.55, 6.55, 6.35, 6.34, 6.31, 6.30, 4.40, 4.38, 4.36, 0.00.

**Integration values:** 2.08, 2.12, 3.40, 3.05, 2.15, 6.41, 2.11, 1.03, 1.01, 1.00.

S17

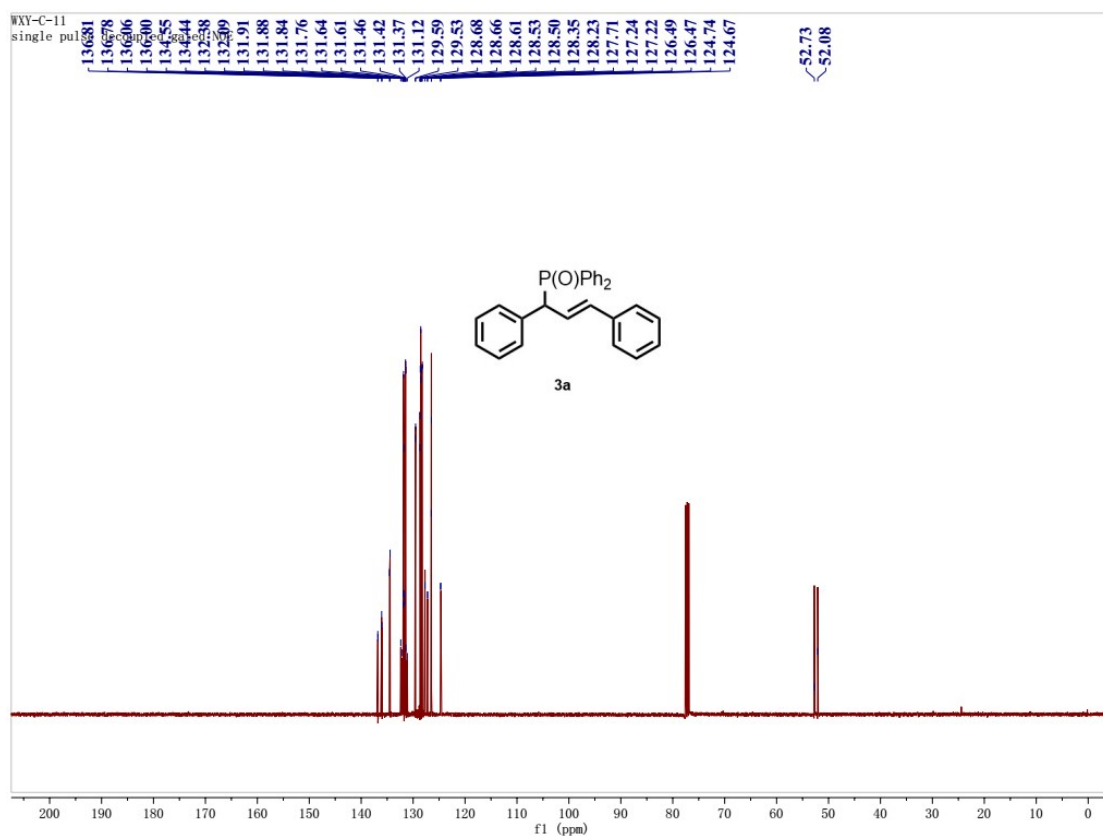

$^{13}\text{C}$  NMR (101 MHz, Chloroform-d) spectra for compound **3a**.

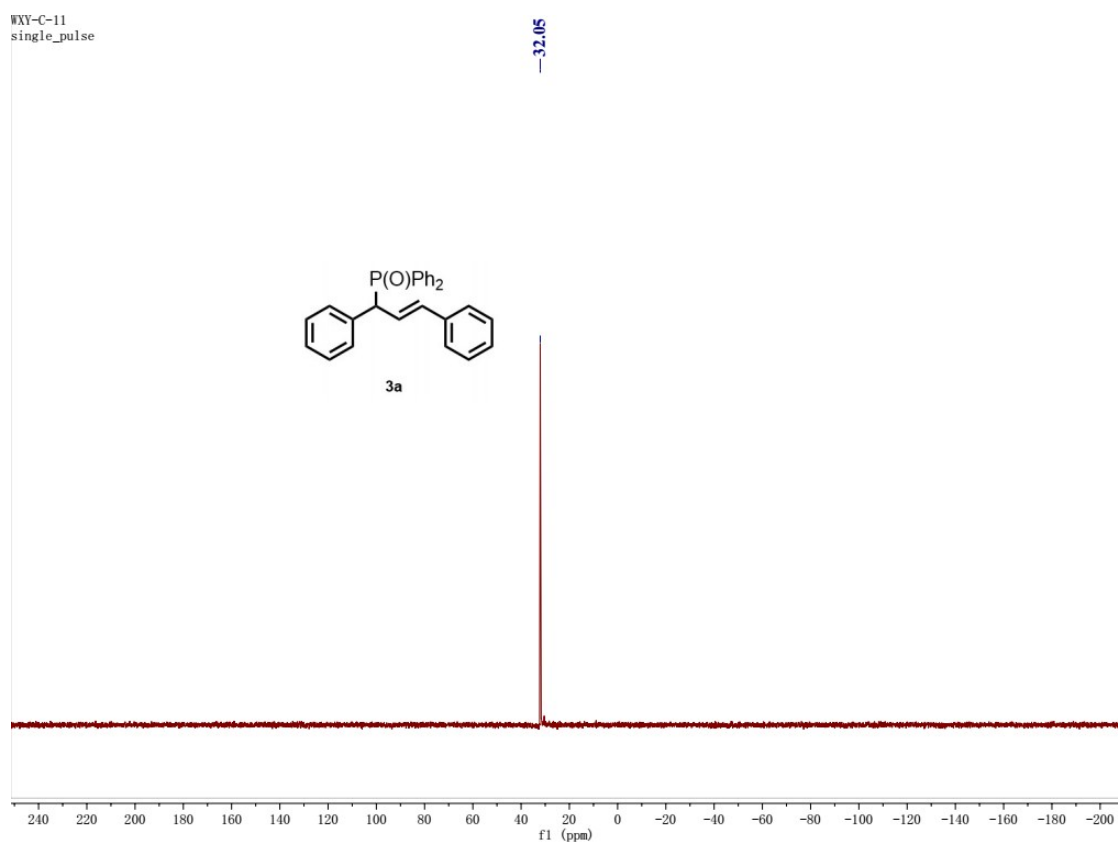

$^{31}\text{P}$  NMR (162 MHz, Chloroform-d) spectra for compound **3a**.

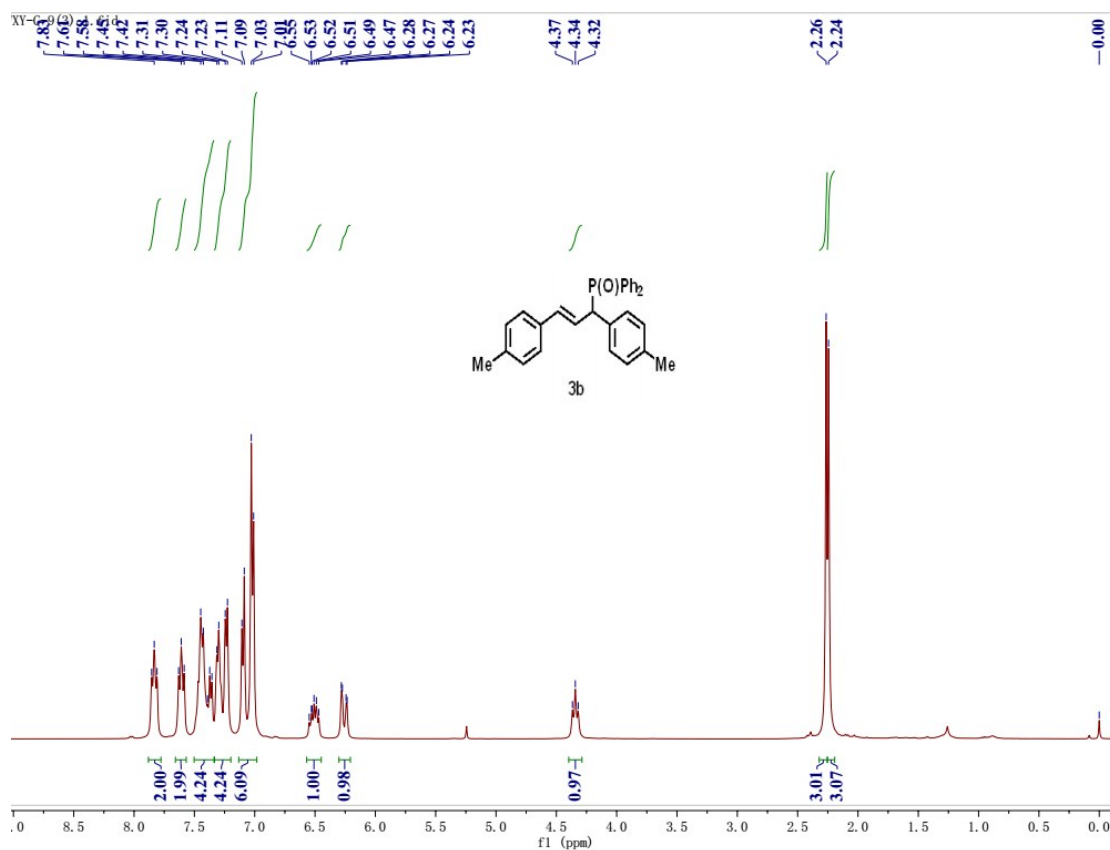

<sup>1</sup>H NMR (400 MHz, Chloroform-d) spectra for compound **3b**.

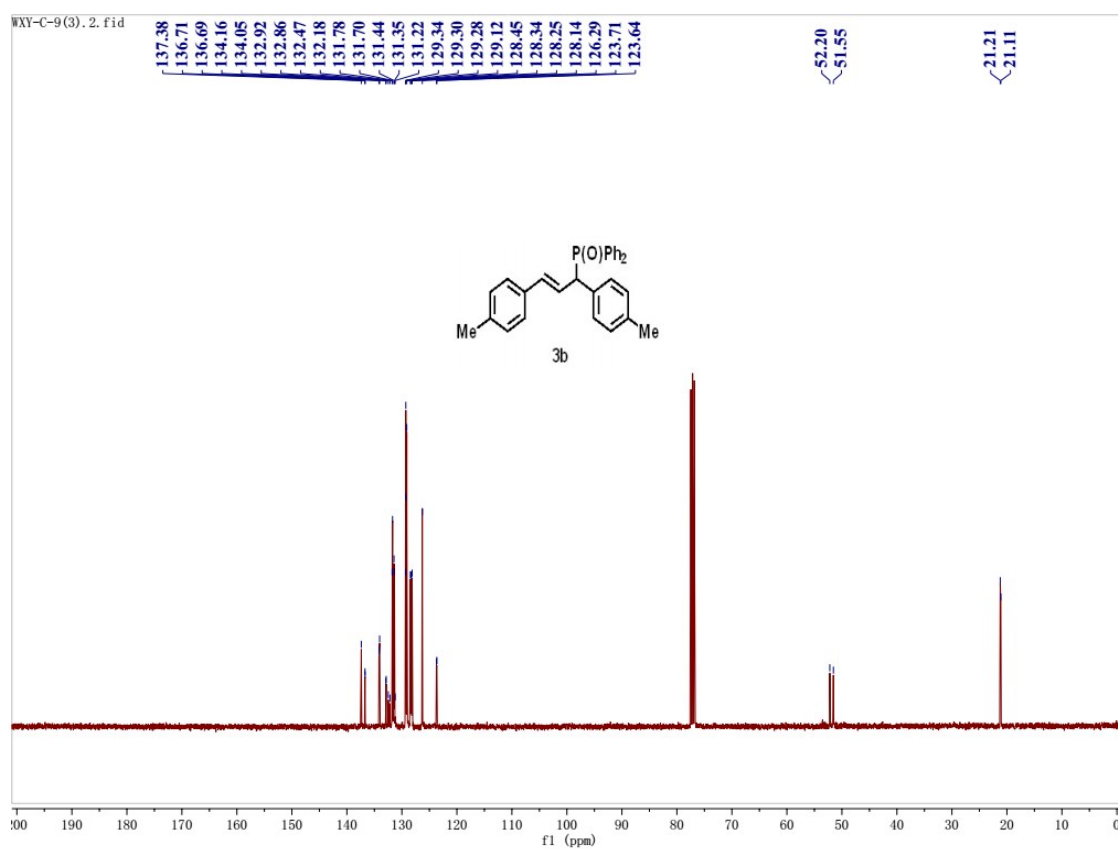

<sup>13</sup>C NMR (101 MHz, Chloroform-d) spectra for compound **3b**.

AT-29(3). 8.119

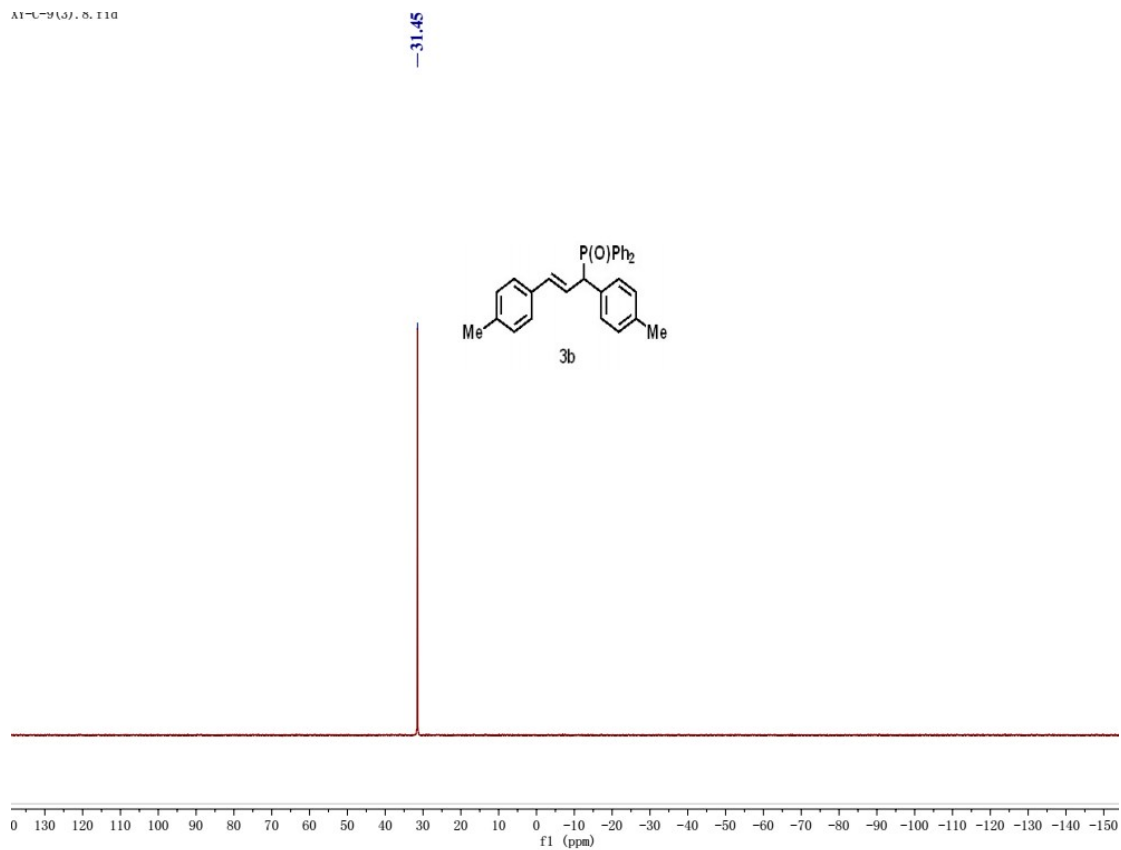

<sup>31</sup>P NMR (162 MHz, Chloroform-d) spectra for compound **3b**.

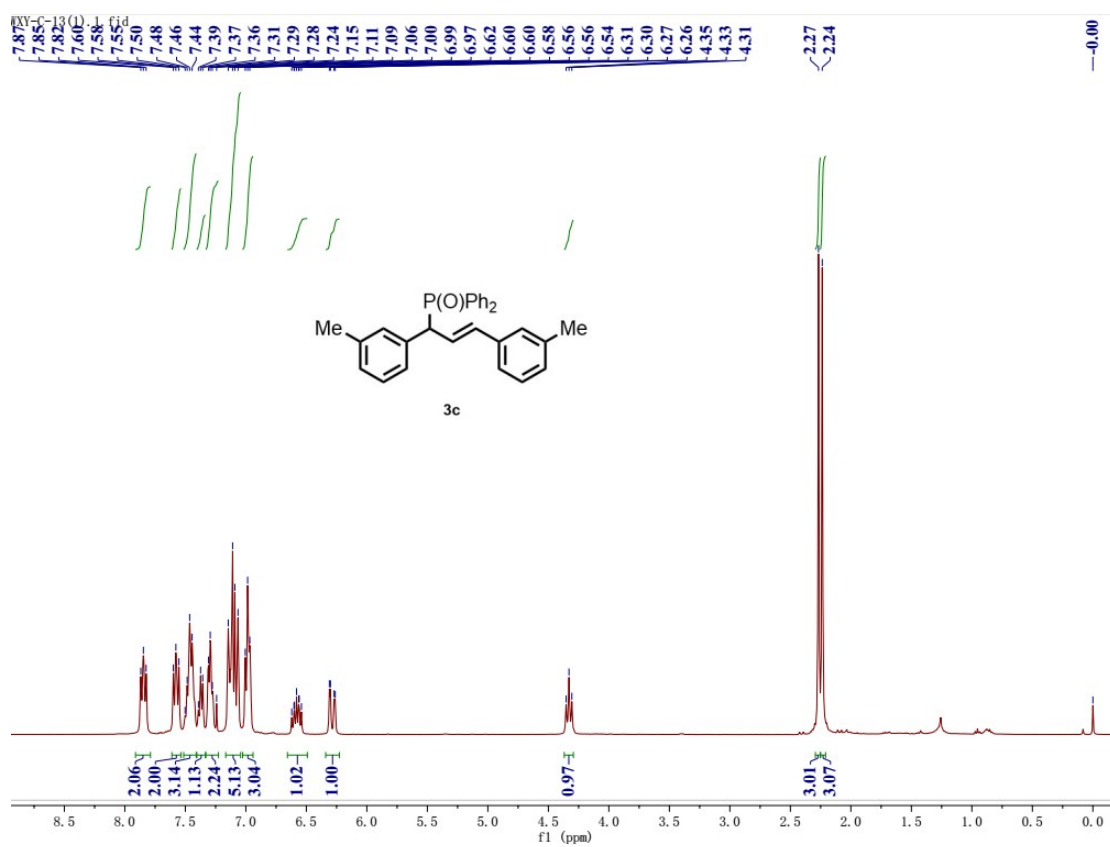

<sup>1</sup>H NMR (400 MHz, Chloroform-d) spectra for compound **3c**.

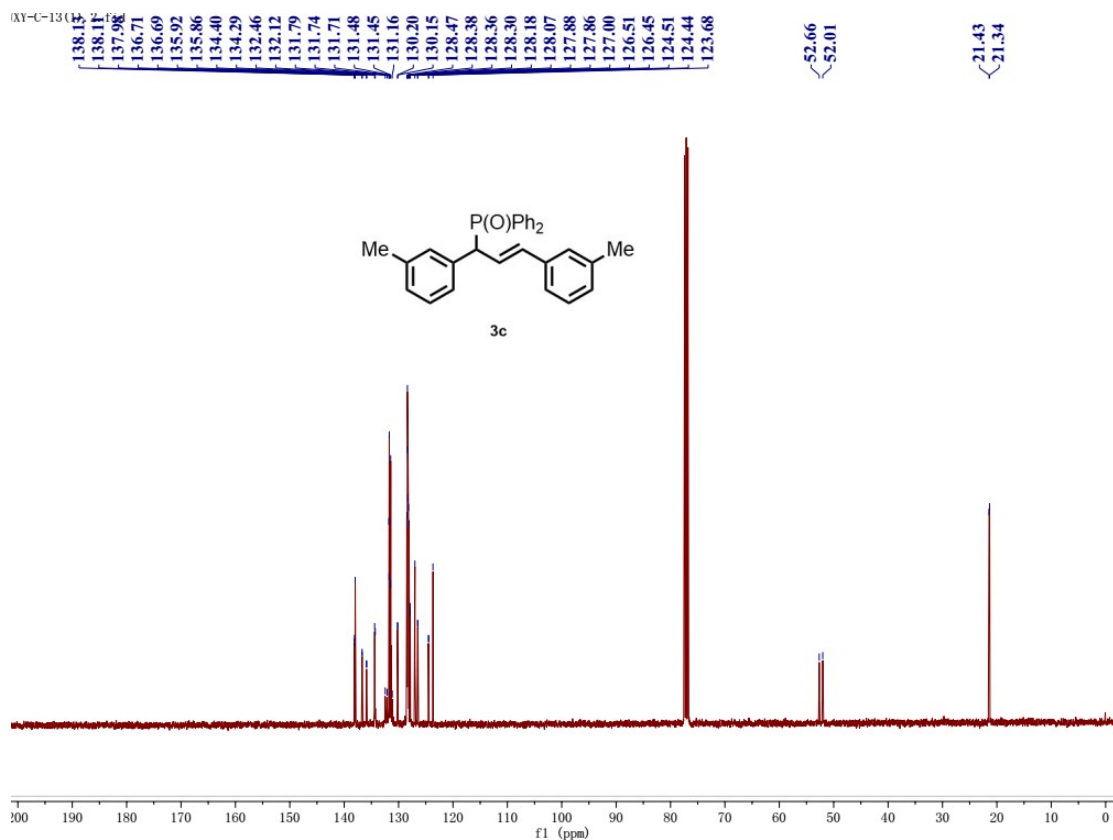

<sup>13</sup>C NMR (101 MHz, Chloroform-d) spectra for compound **3c**.

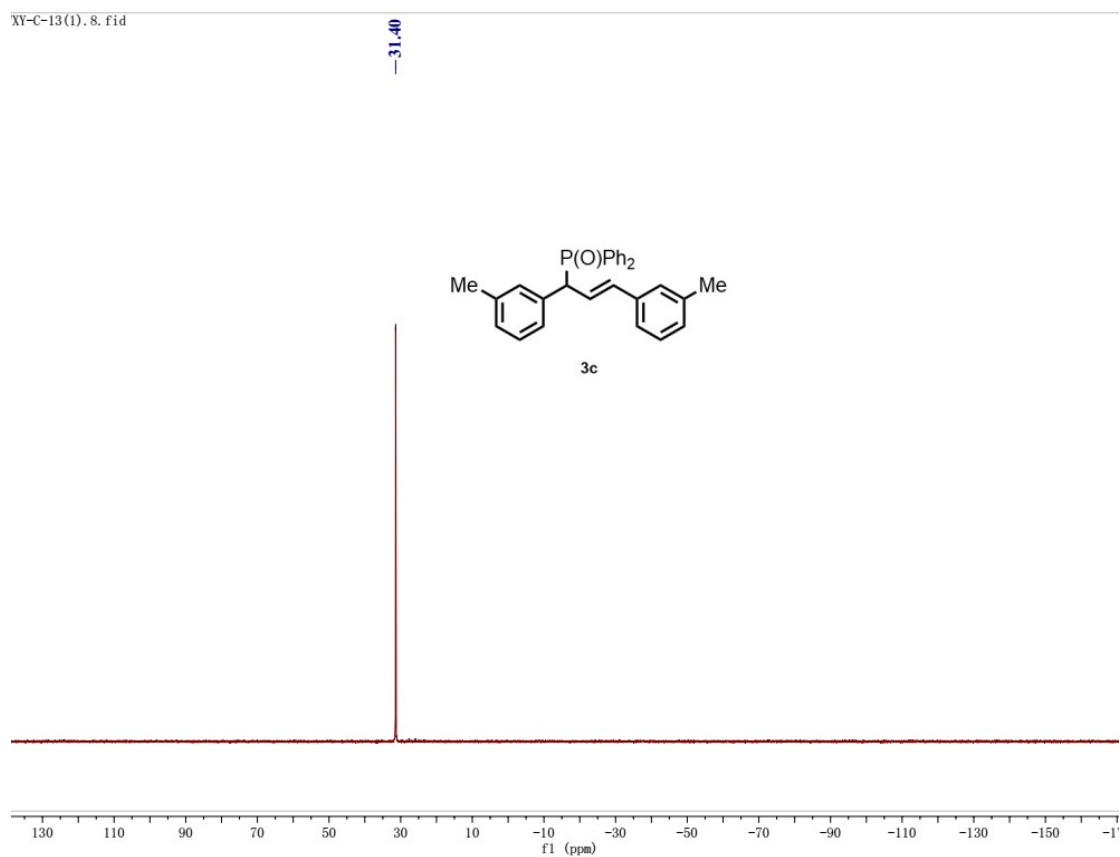

<sup>31</sup>P NMR (162 MHz, Chloroform-d) spectra for compound **3c**.

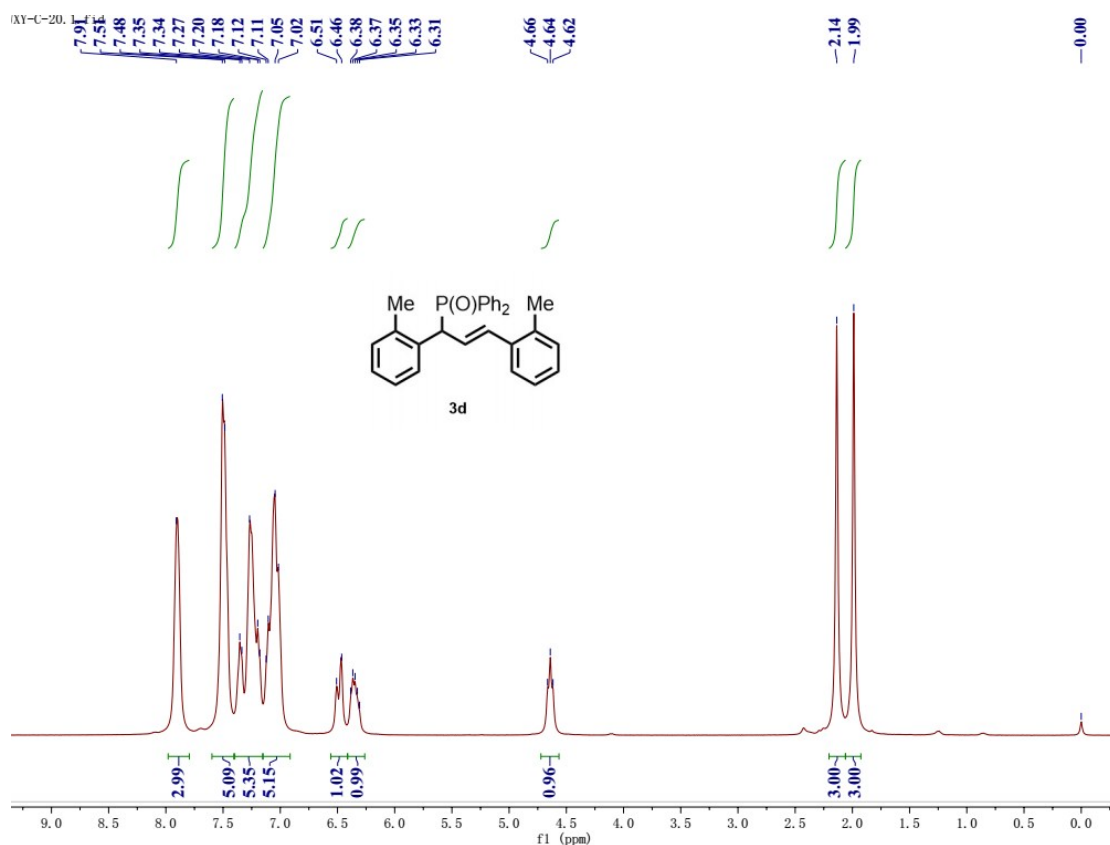

<sup>1</sup>H NMR (400 MHz, Chloroform-d) spectra for compound **3d**.

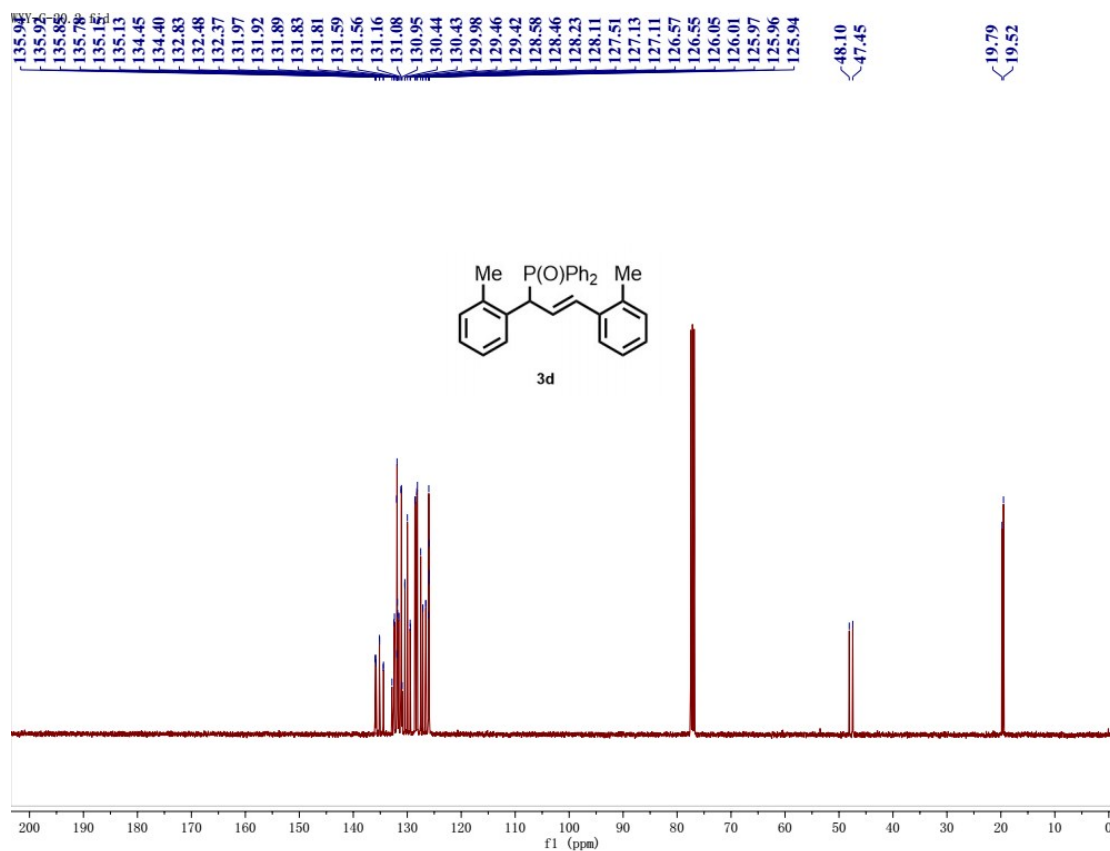

<sup>13</sup>C NMR (101 MHz, Chloroform-d) spectra for compound **3d**.

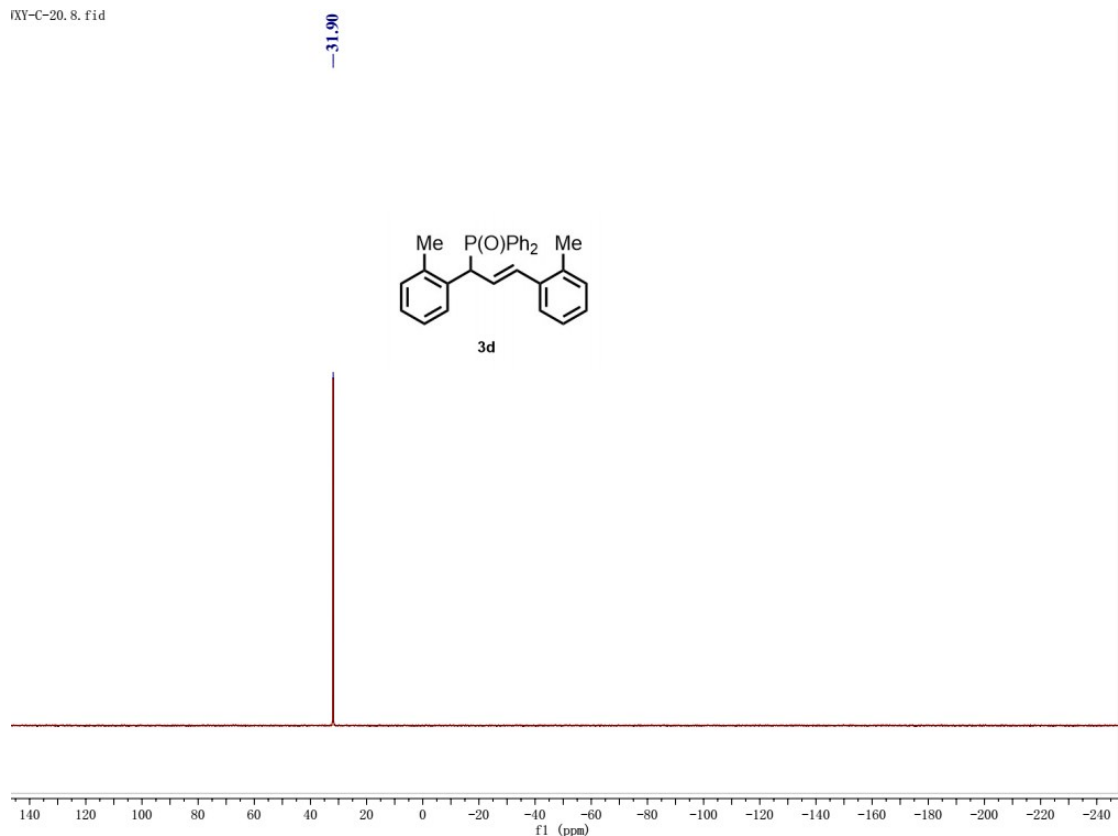

<sup>31</sup>P NMR (162 MHz, Chloroform-d) spectra for compound **3d**.

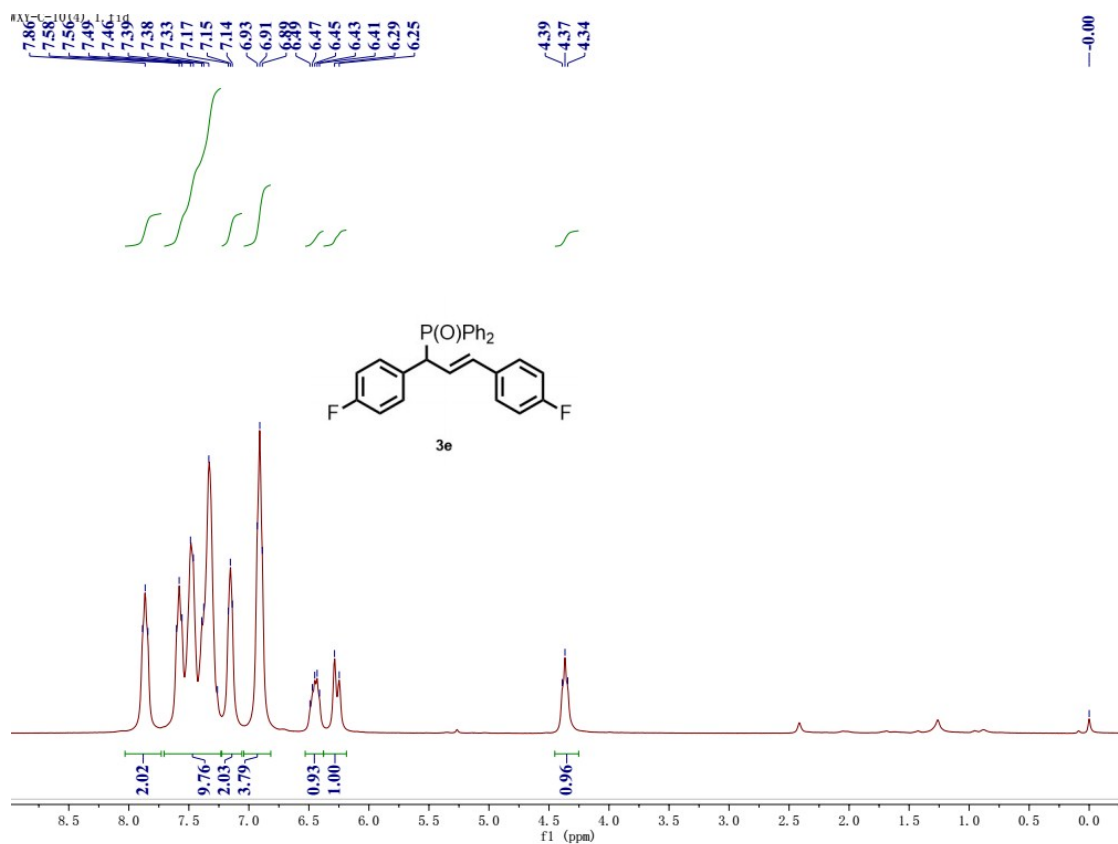

<sup>1</sup>H NMR (400 MHz, Chloroform-d) spectra for compound **3e**.



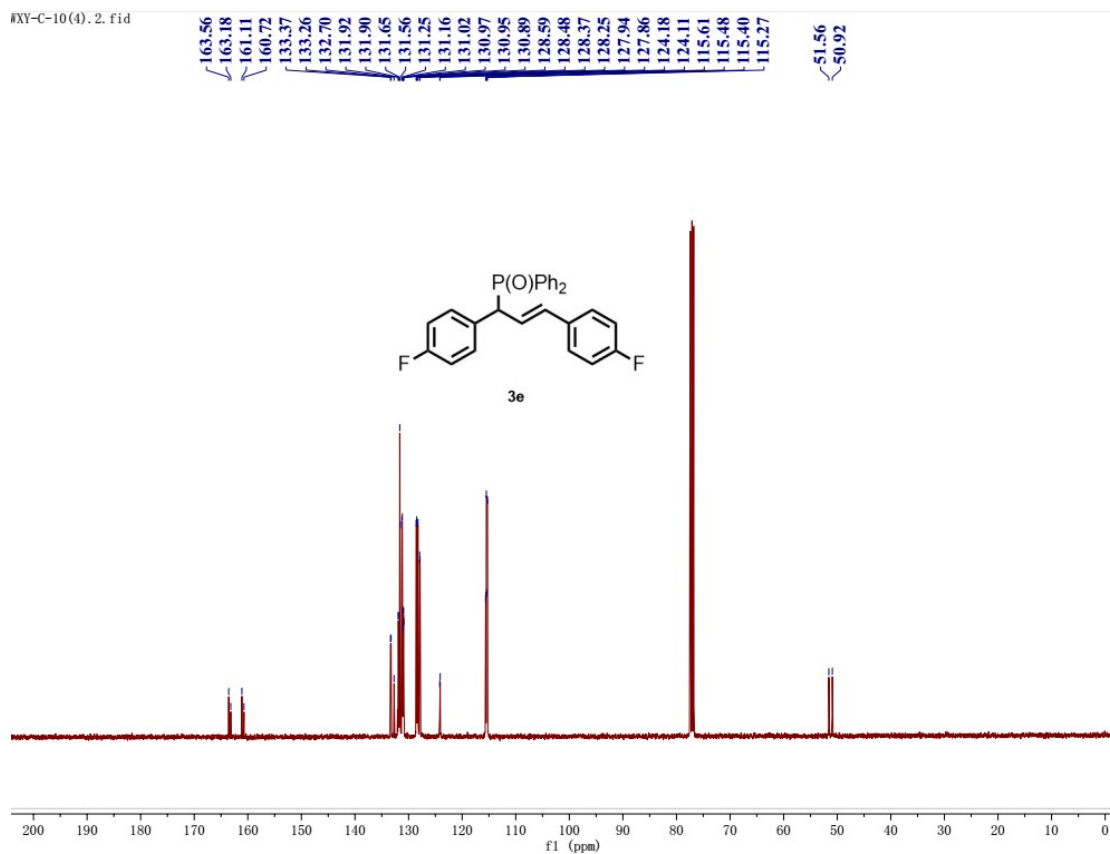

$^{13}\text{C}$  NMR (101 MHz, Chloroform-d) spectra for compound **3e**.

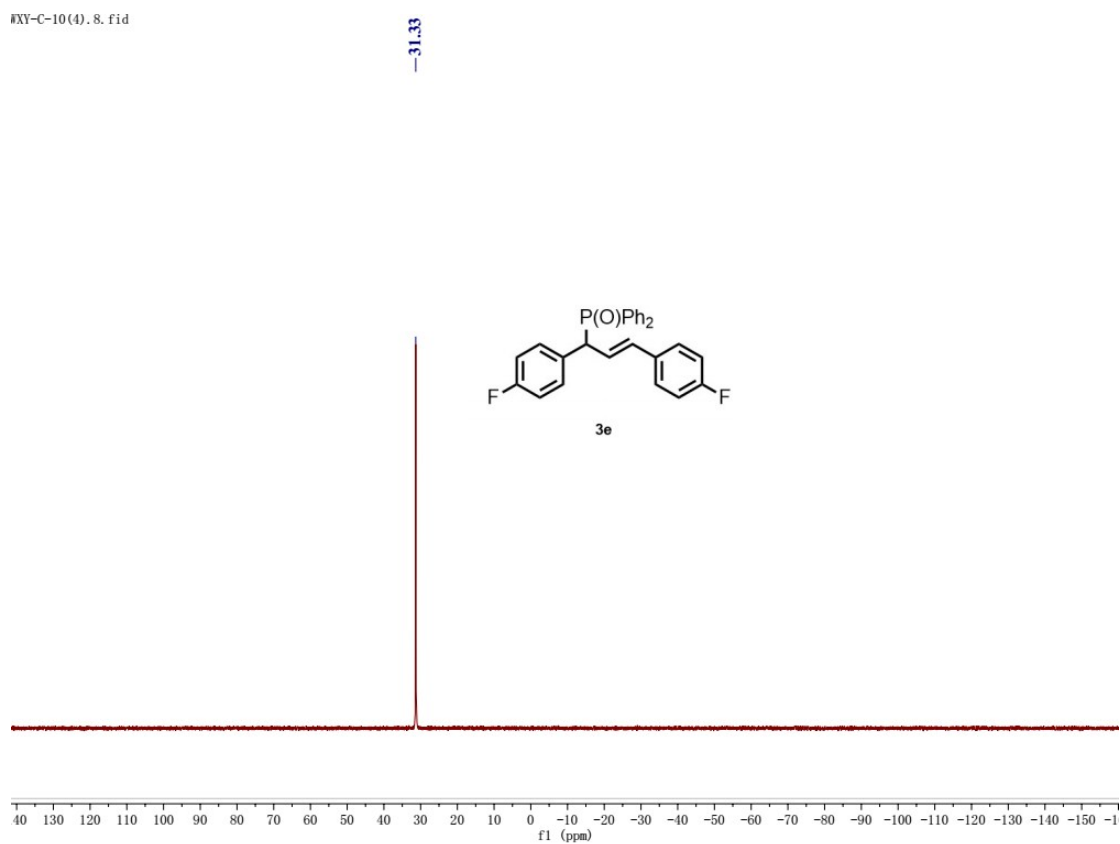

$^{31}\text{P}$  NMR (162 MHz, Chloroform-d) spectra for compound **3e**.

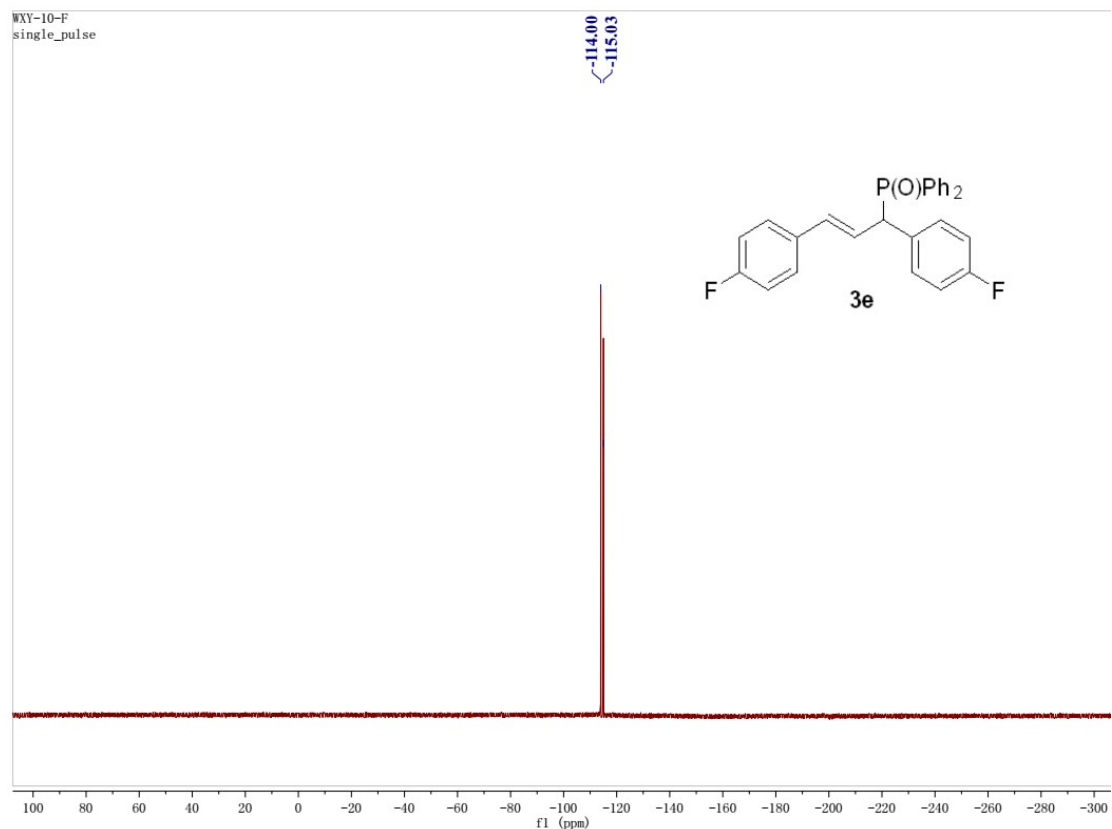

$^{19}\text{F}$  NMR (376 MHz, Chloroform- $d$ ) spectra for compound **3e**.

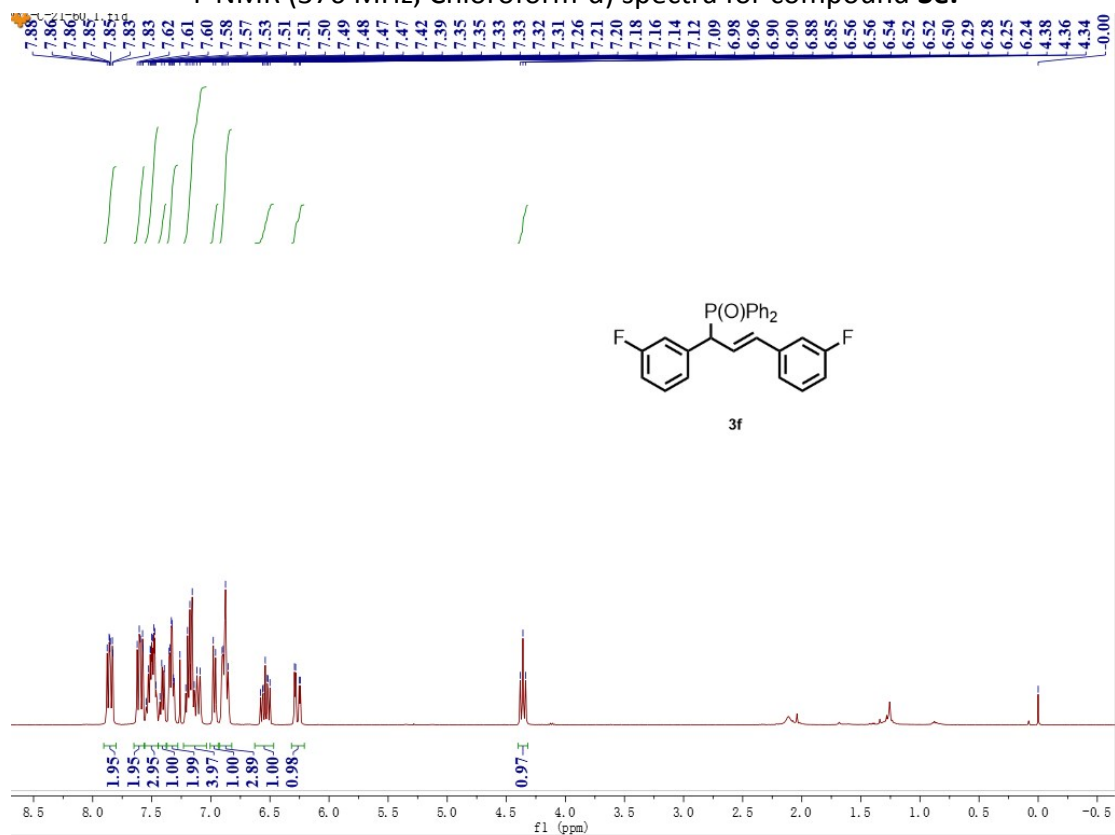

$^1\text{H}$  NMR (400 MHz, Chloroform- $d$ ) spectra for compound **3f**.

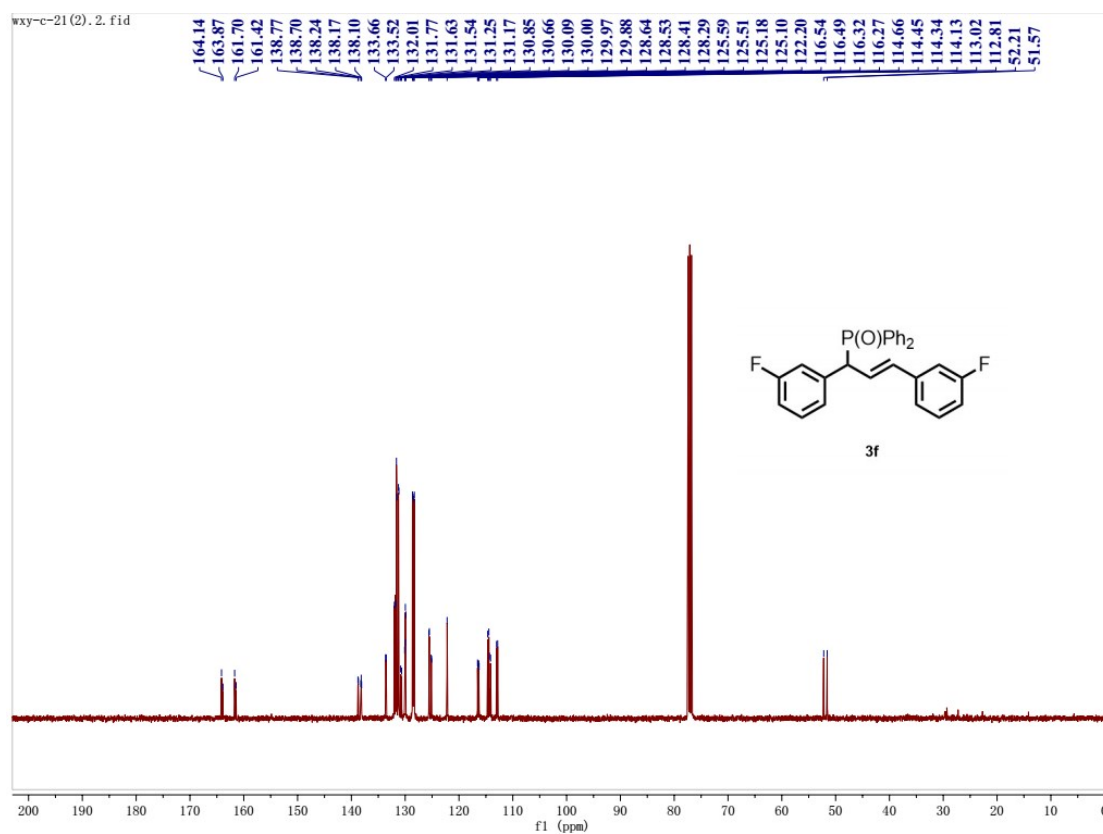

$^{13}\text{C}$  NMR (101 MHz, Chloroform-d) spectra for compound **3f**.

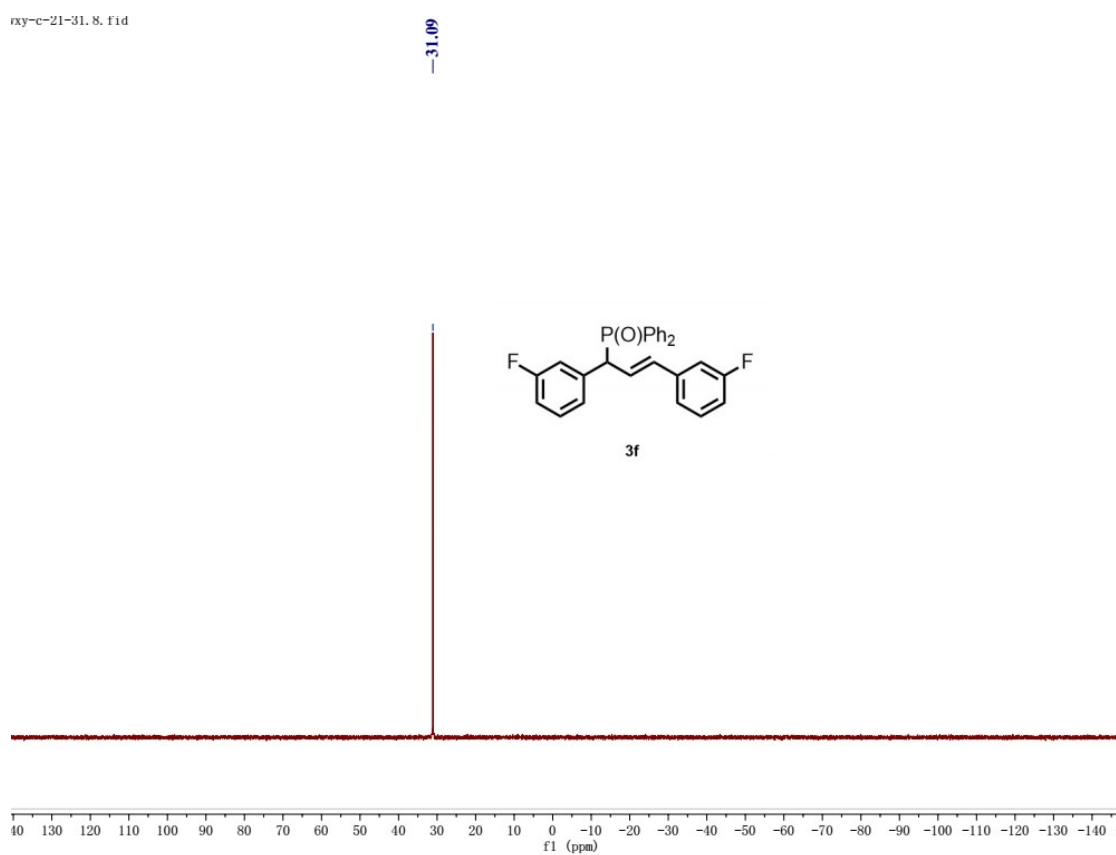

$^{31}\text{P}$  NMR (162 MHz, Chloroform-d) spectra for compound **3f**.

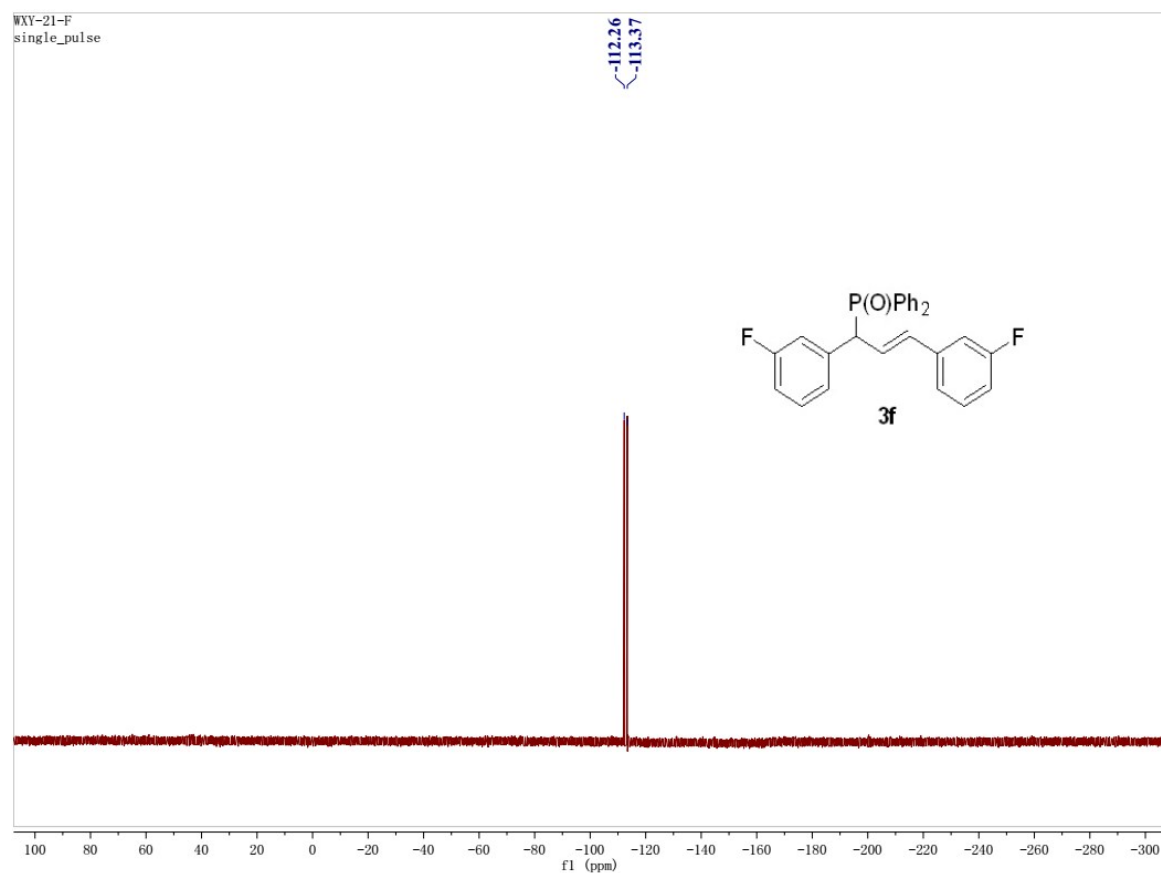

$^{19}\text{F}$  NMR (376 MHz, Chloroform- $d$ ) spectra for compound **3f**.

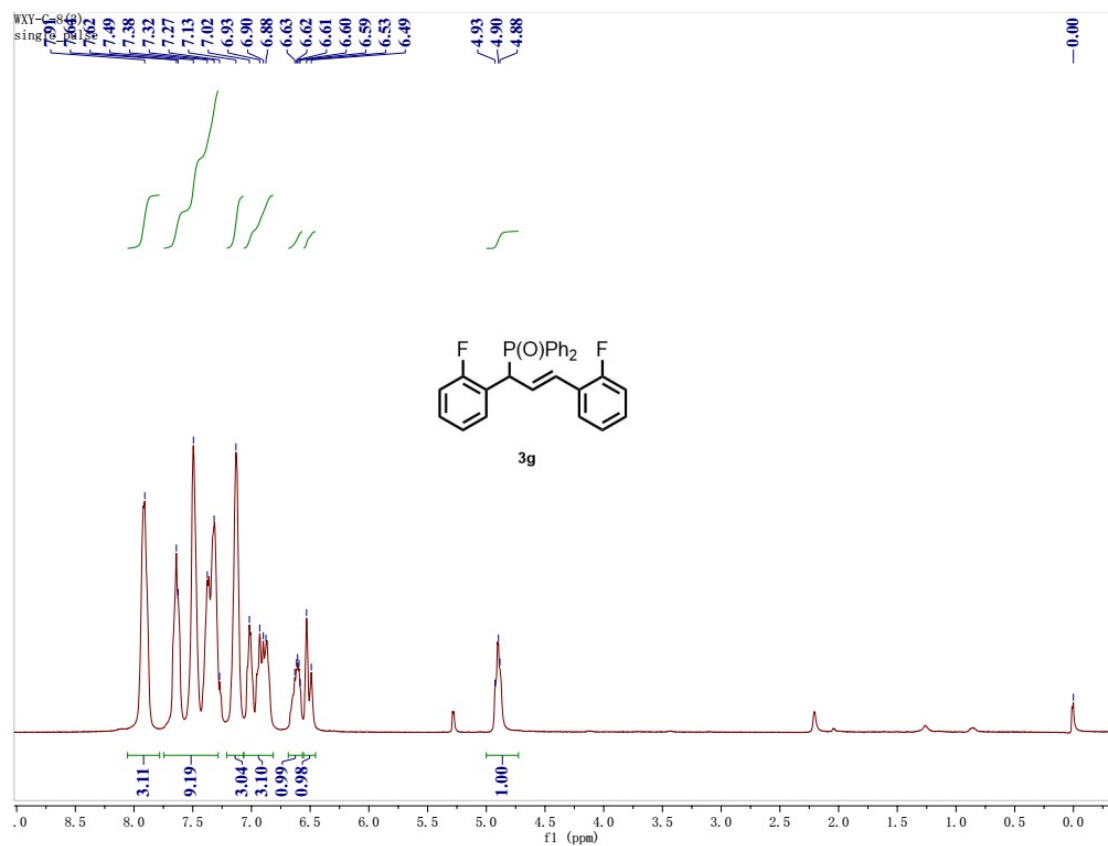

$^1\text{H}$  NMR (400 MHz, Chloroform- $d$ ) spectra for compound **3g**.

XY-C-8(b). 2. f1d

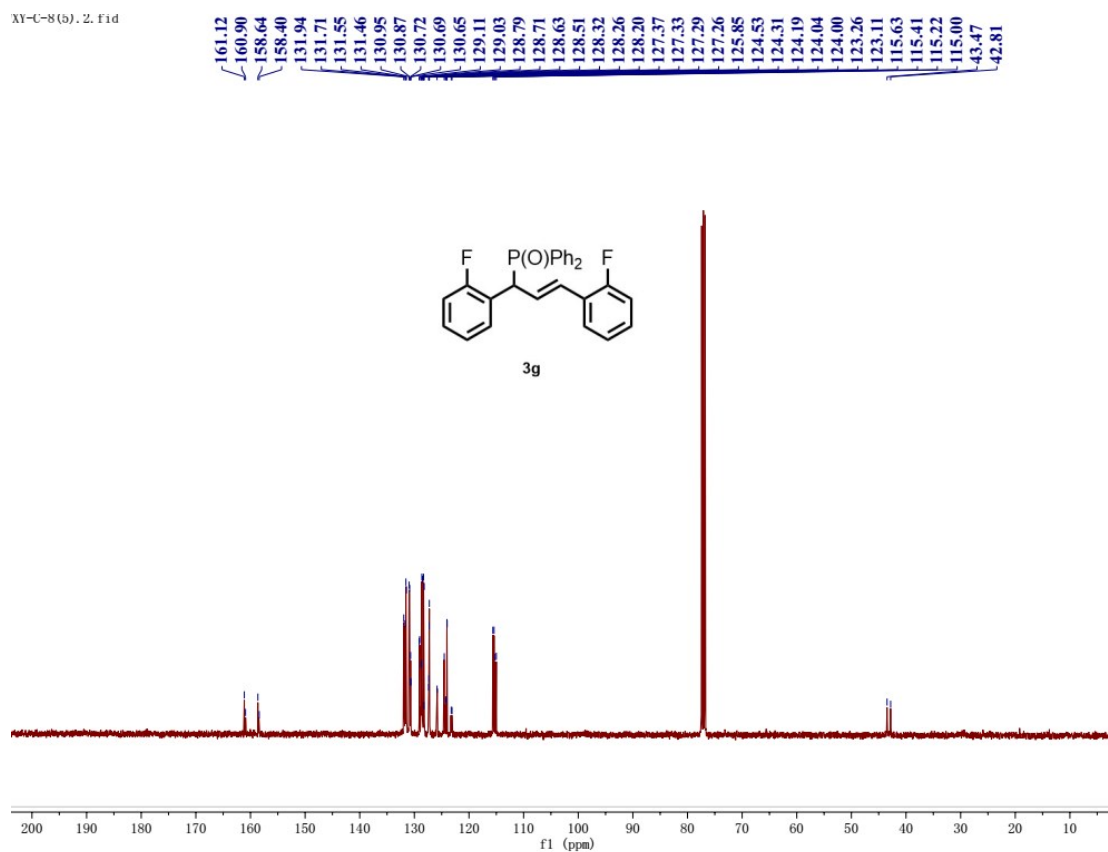

<sup>13</sup>C NMR (101 MHz, Chloroform-d) spectra for compound **3g**.

XY-C-8(4). 8. f1d

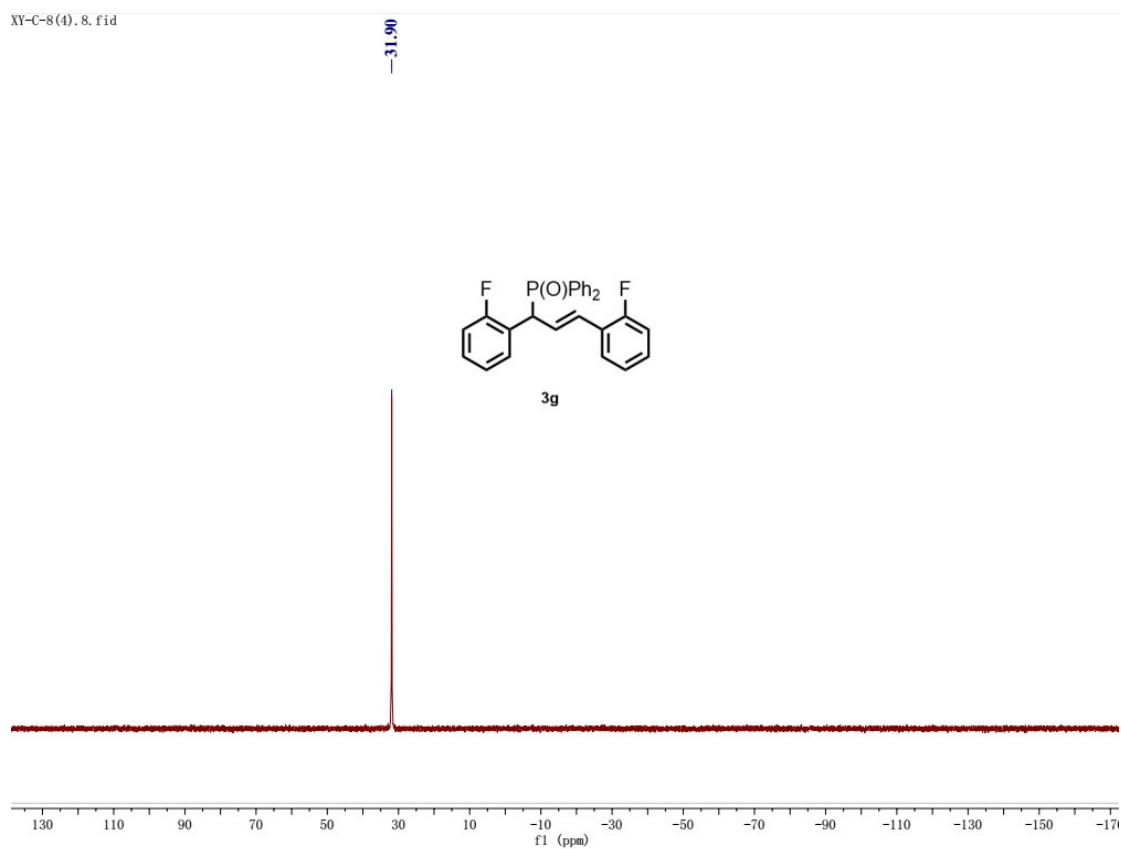

<sup>31</sup>P NMR (162 MHz, Chloroform-d) spectra for compound **3g**.

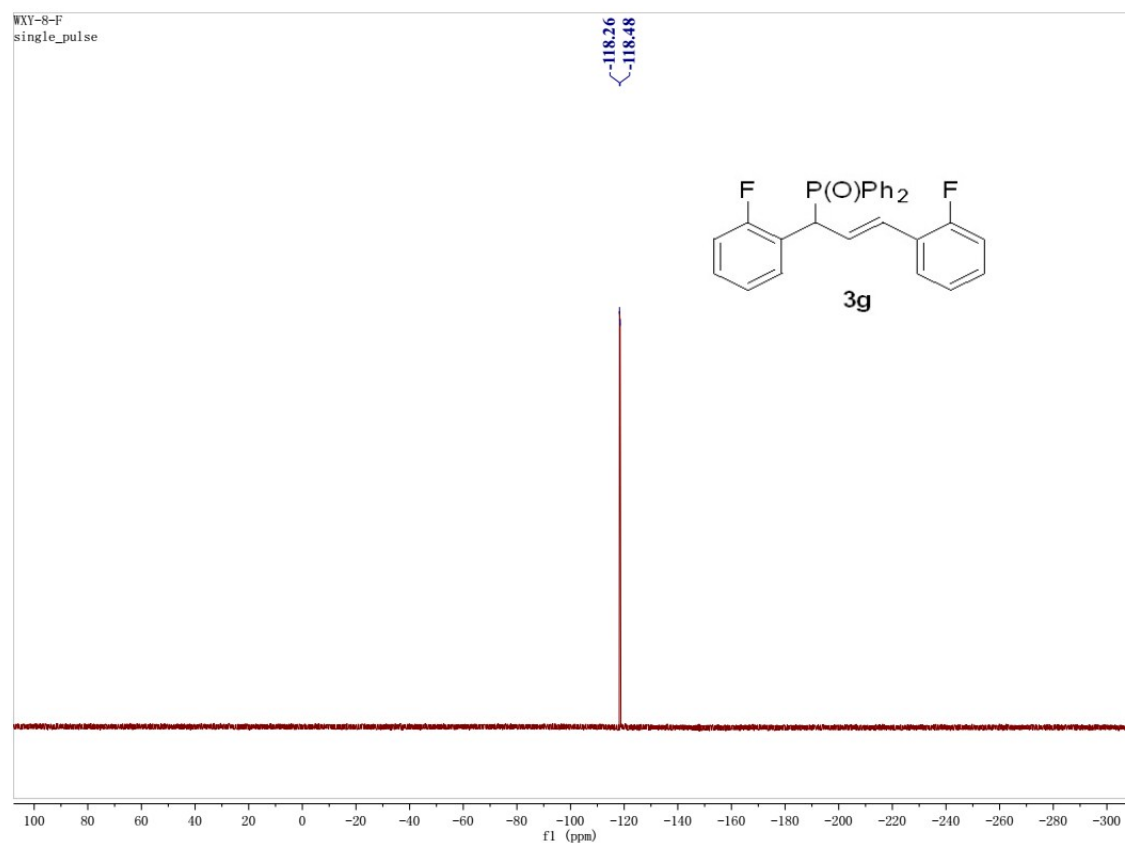

$^{19}\text{F}$  NMR (376 MHz, Chloroform-d) spectra for compound **3g**.

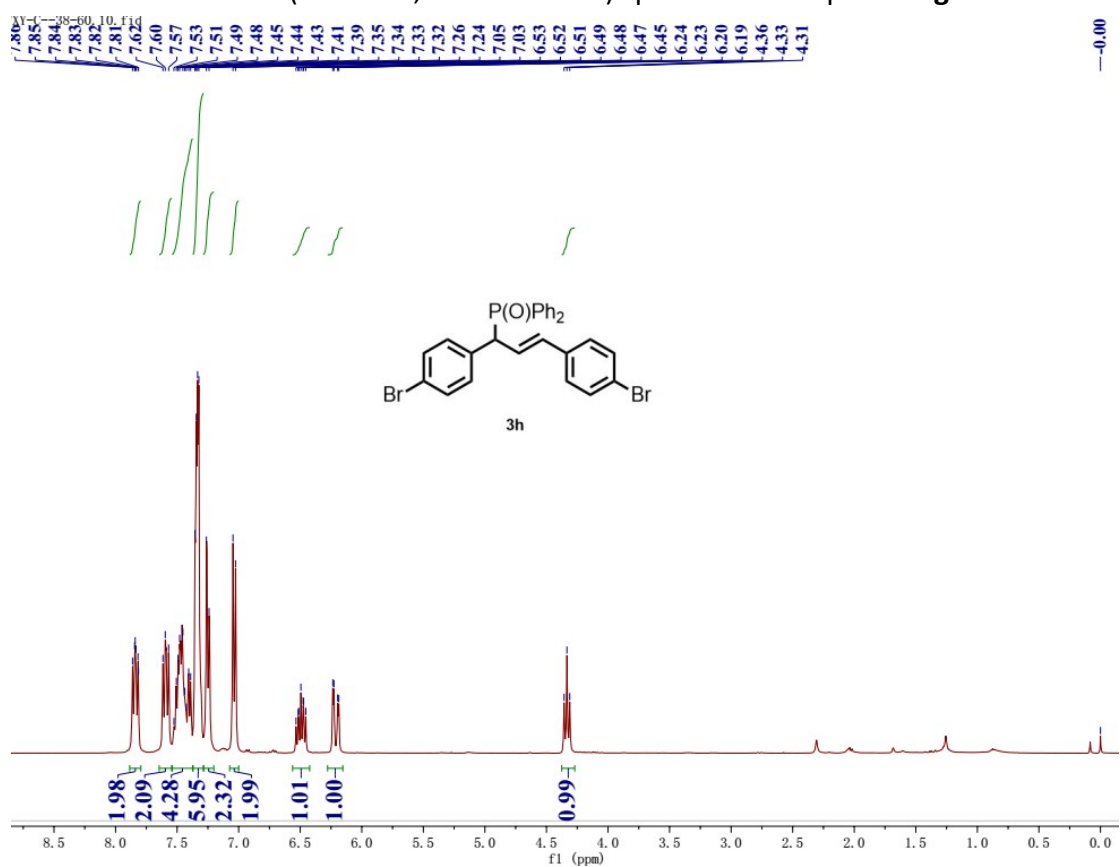

$^1\text{H}$  NMR (400 MHz, Chloroform-d) spectra for compound **3h**.

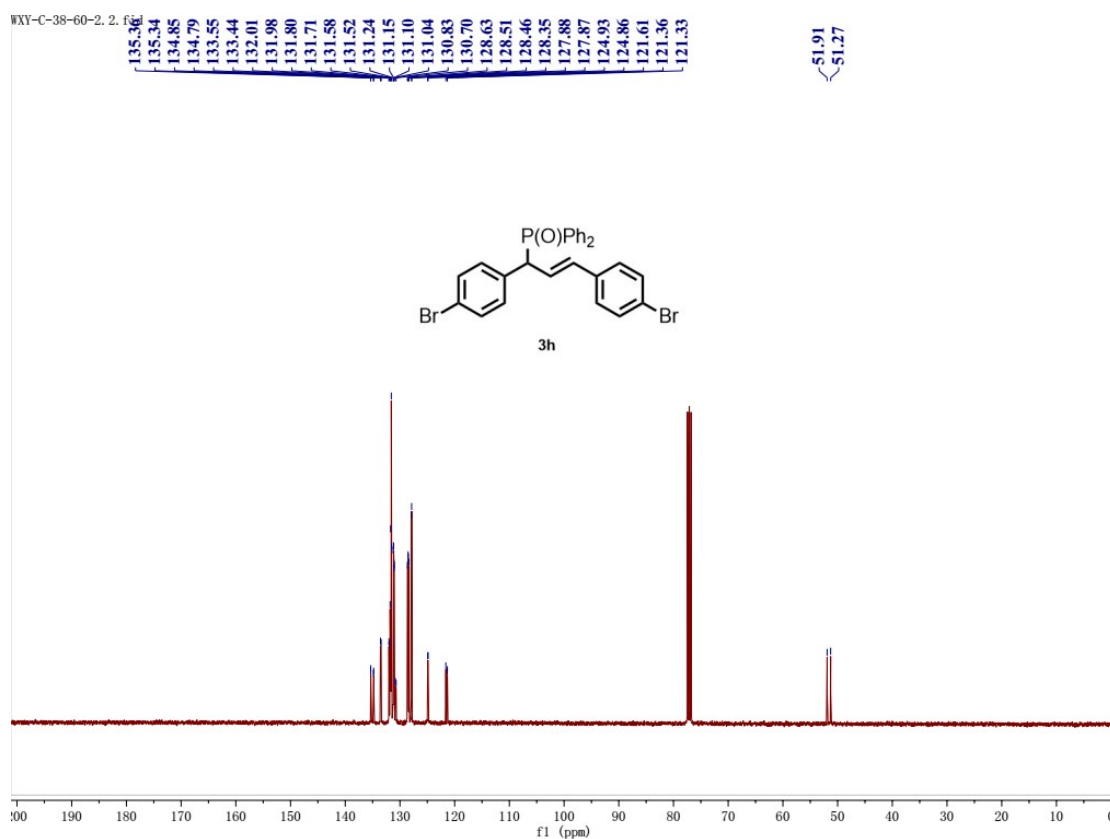

<sup>13</sup>C NMR (101 MHz, Chloroform-d) spectra for compound **3h**.

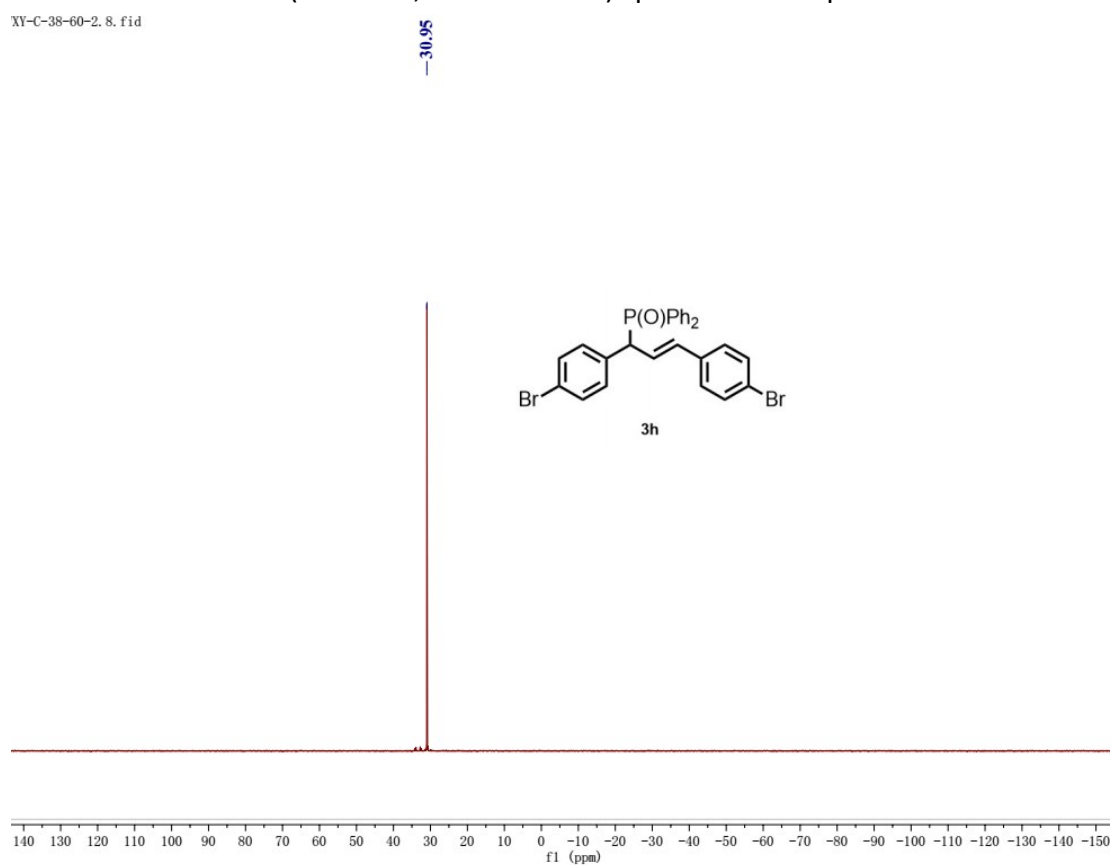

<sup>31</sup>P NMR (162 MHz, Chloroform-d) spectra for compound **3h**.

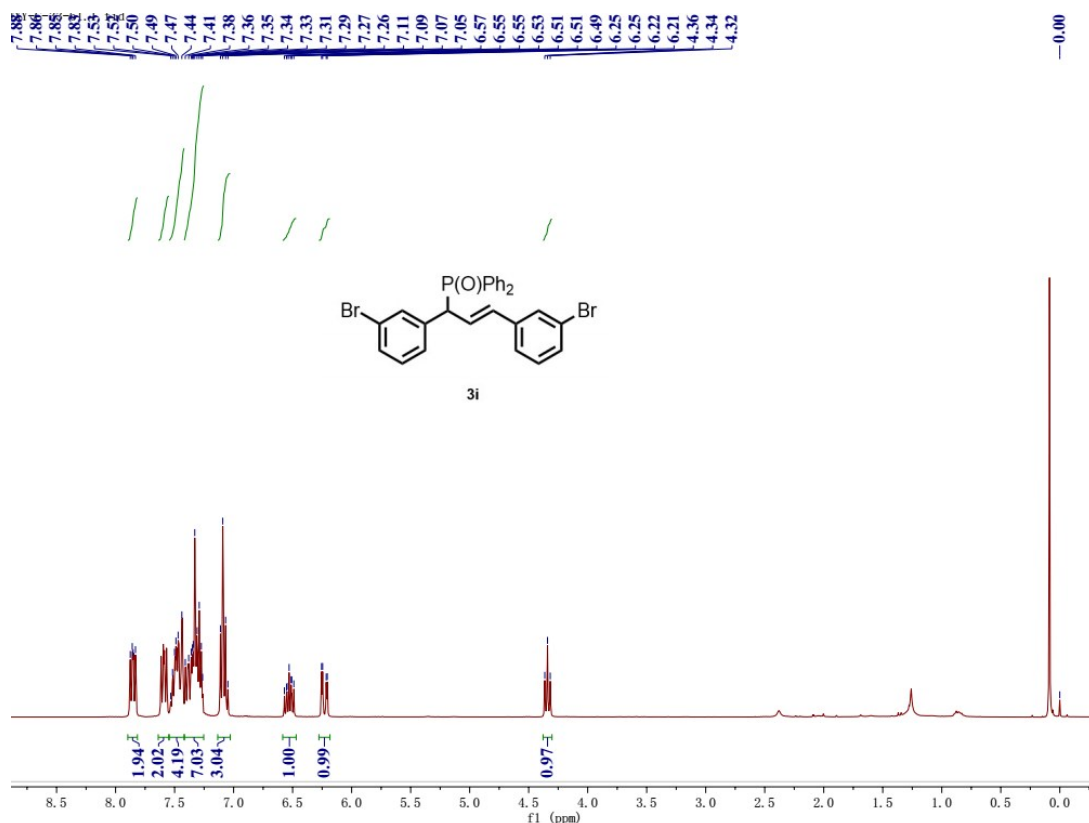

<sup>1</sup>H NMR (400 MHz, Chloroform-d) spectra for compound **3i**.

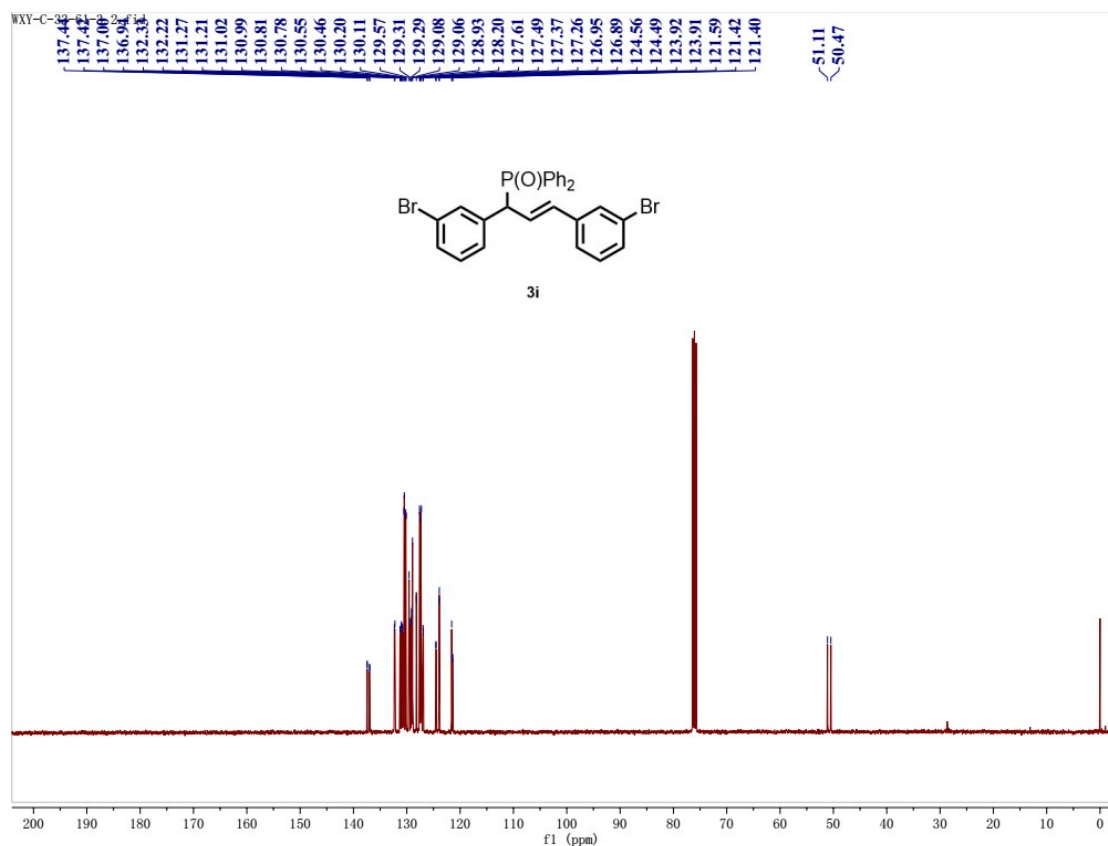

<sup>13</sup>C NMR (101 MHz, Chloroform-d) spectra for compound **3i**.



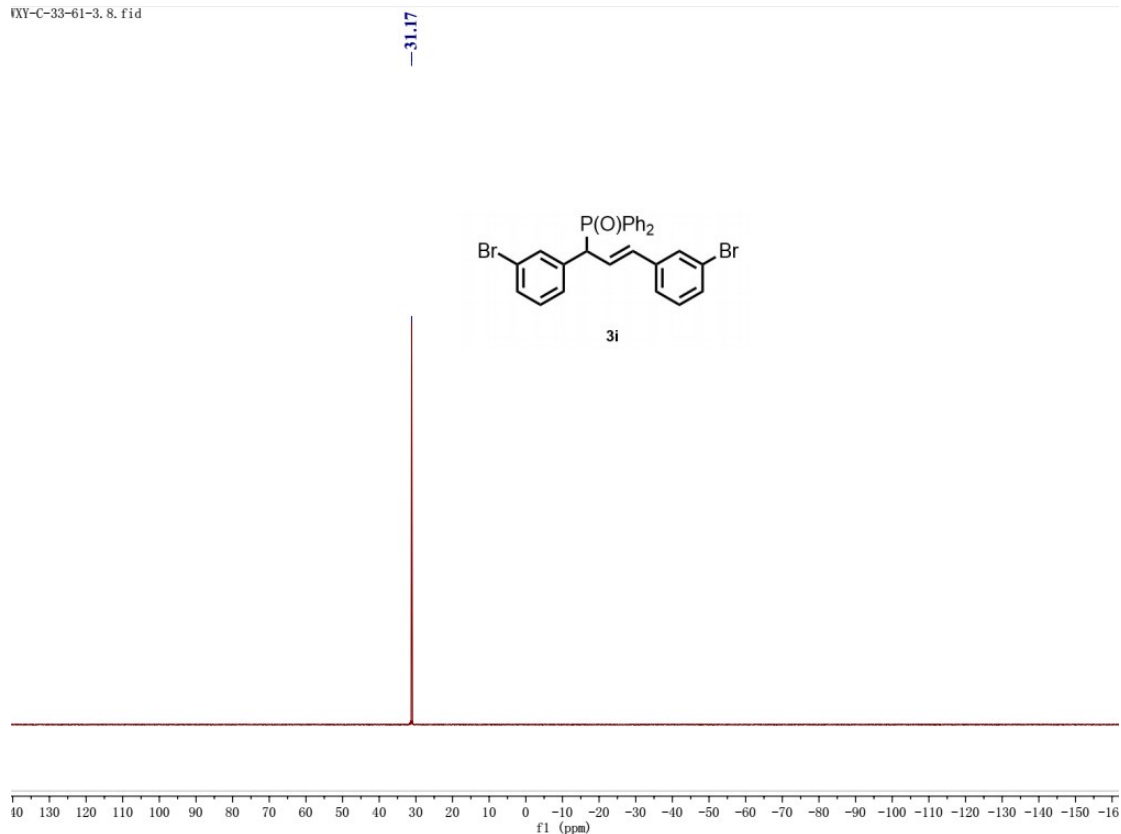

<sup>31</sup>P NMR (162 MHz, Chloroform-d) spectra for compound **3i**.

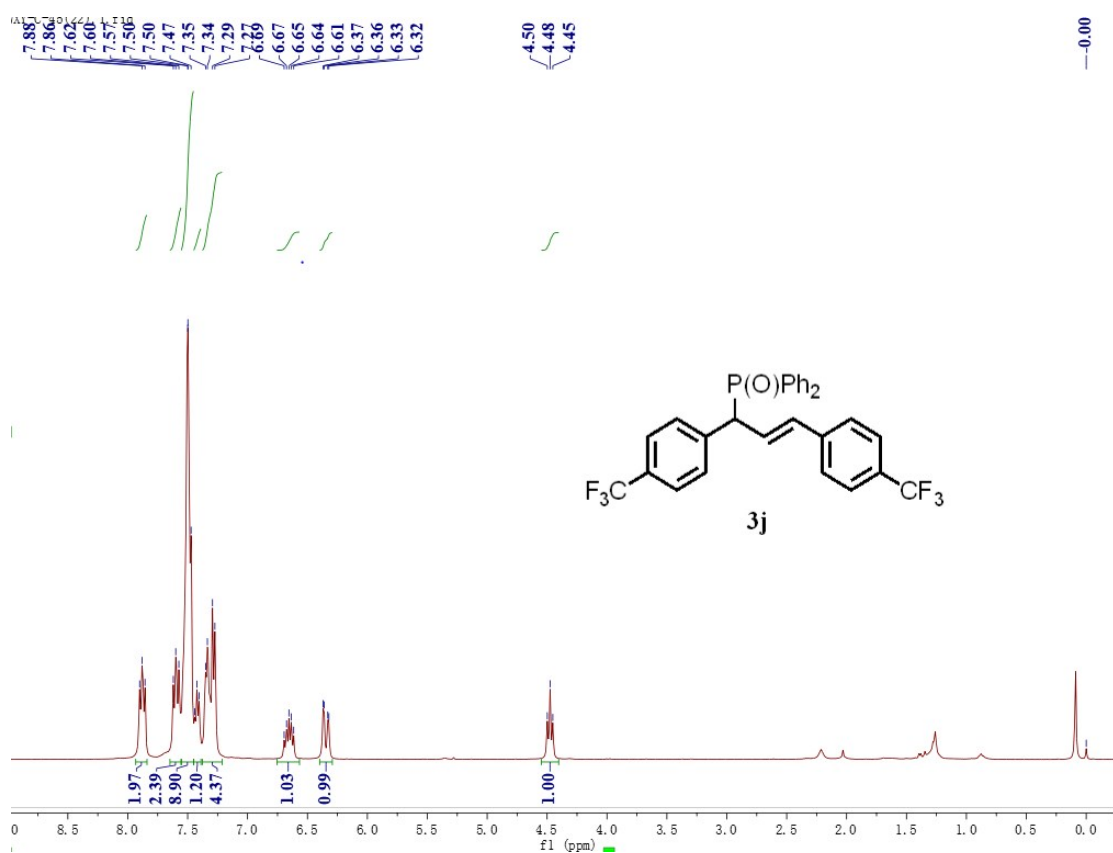

<sup>1</sup>H NMR (400 MHz, Chloroform-d) spectra for compound **3j**.

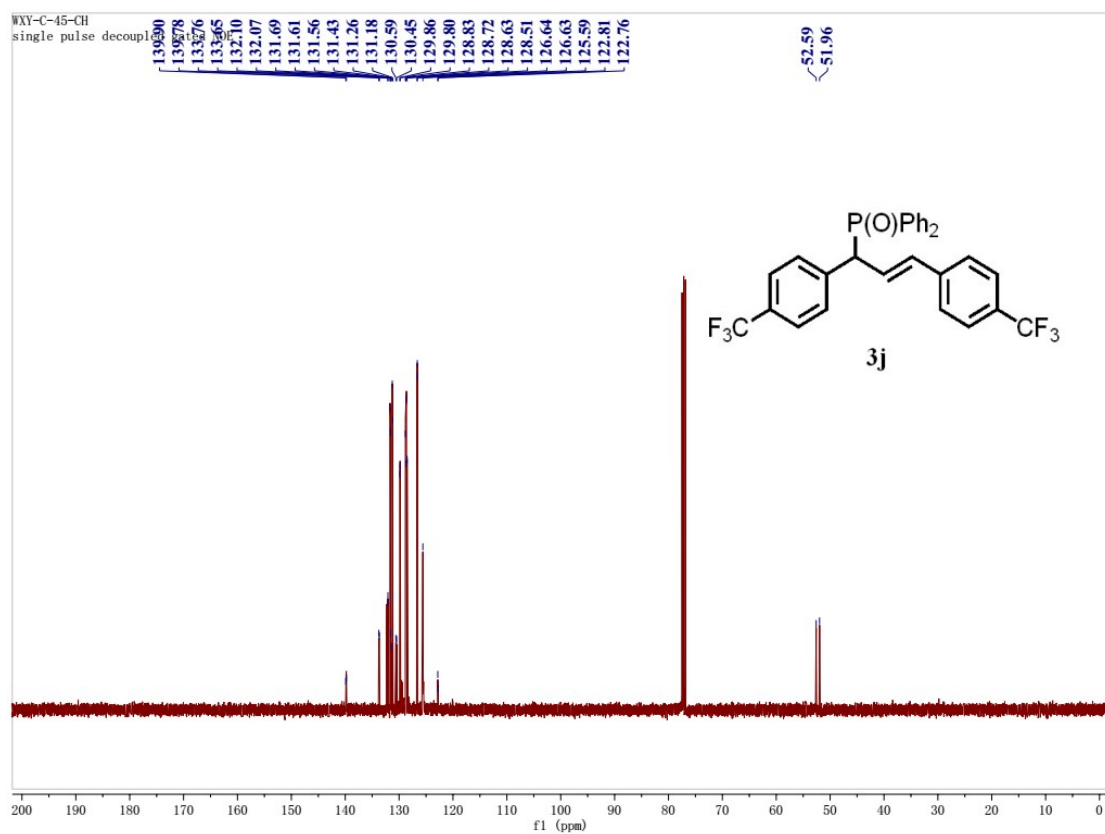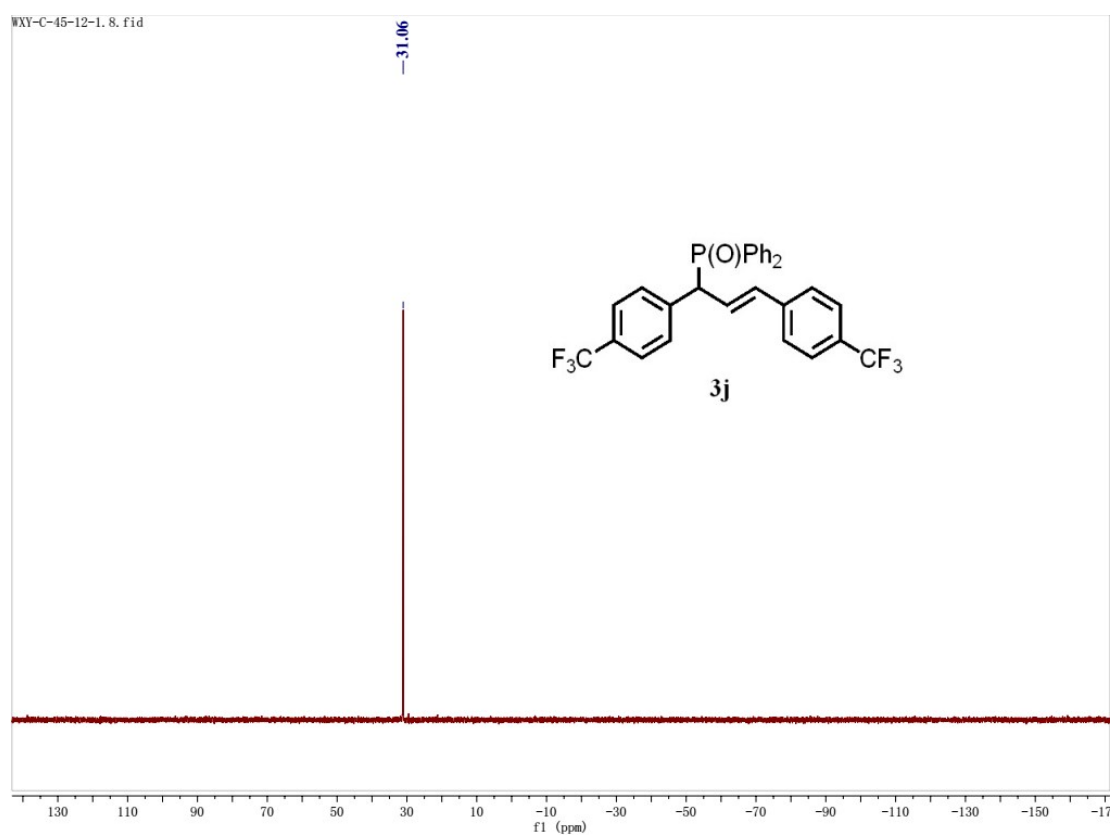

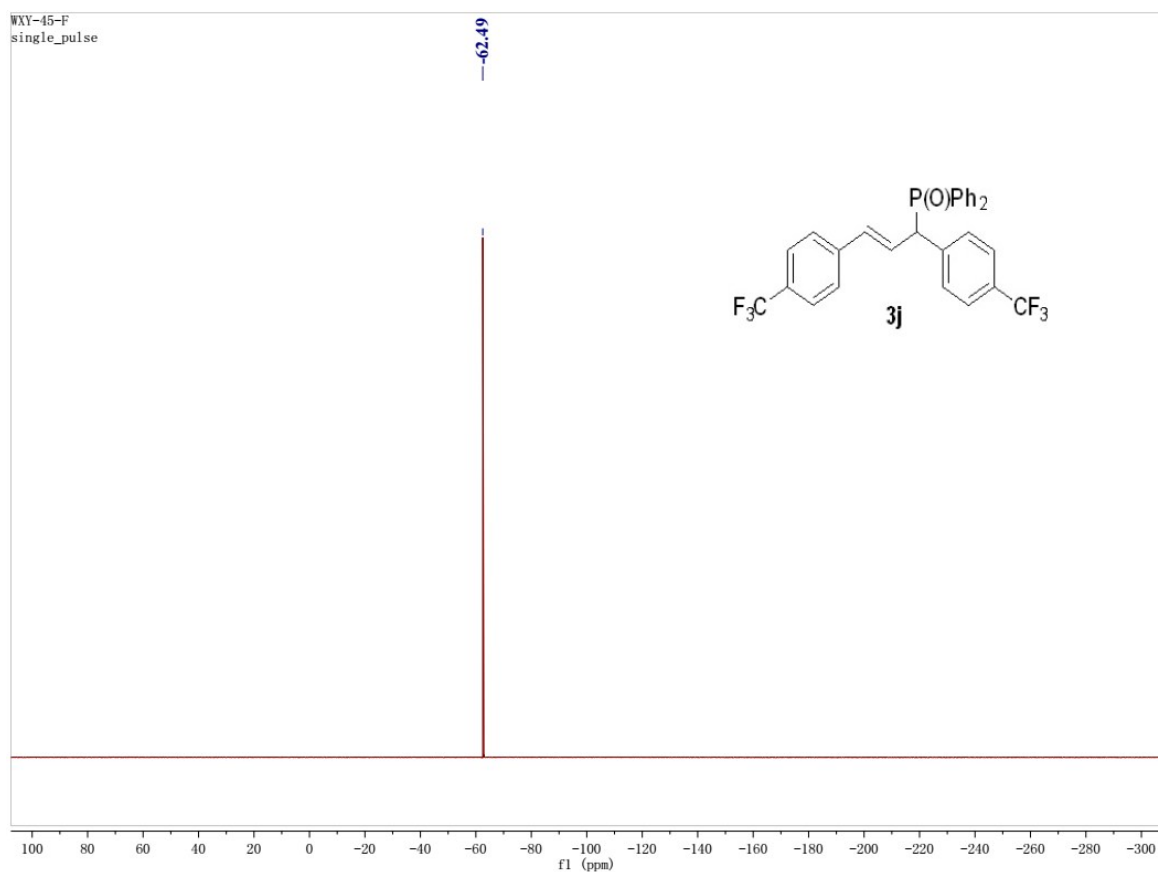

<sup>19</sup>F NMR (376 MHz, Chloroform-d) spectra for compound **3j**.

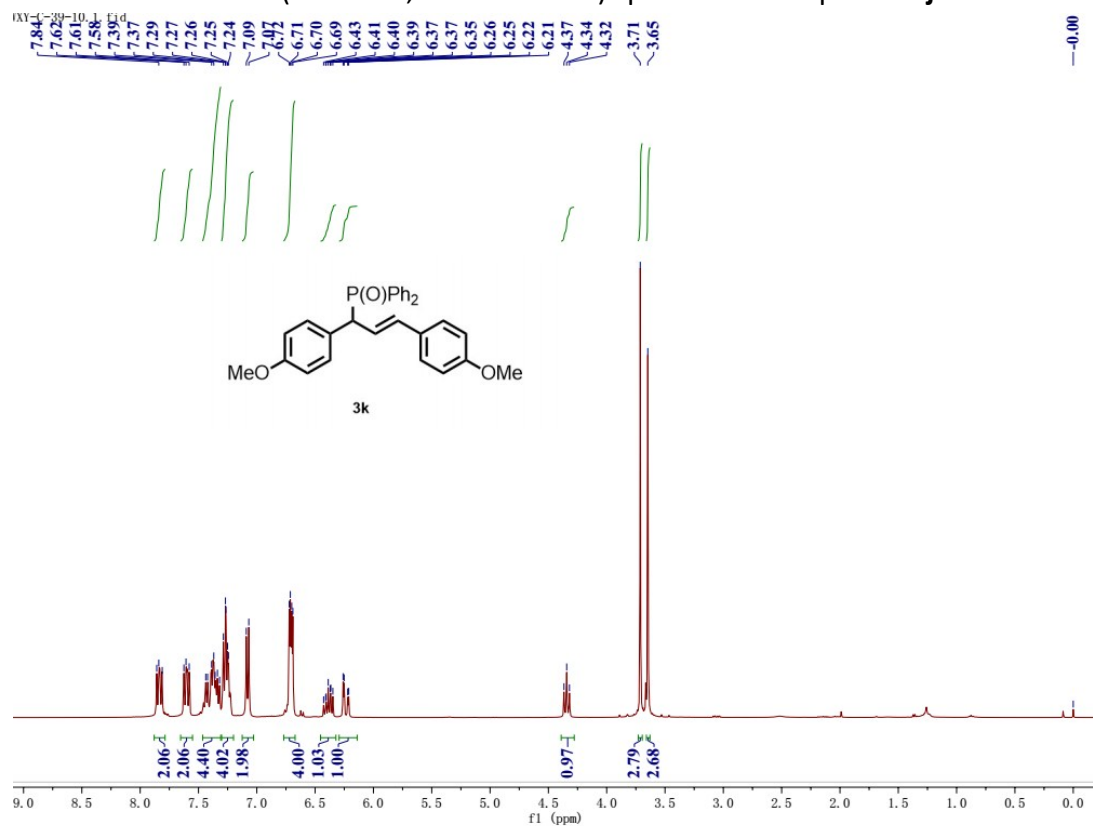

<sup>1</sup>H NMR (400 MHz, Chloroform-d) spectra for compound **3k**.

XY-C-39-5.2.fid

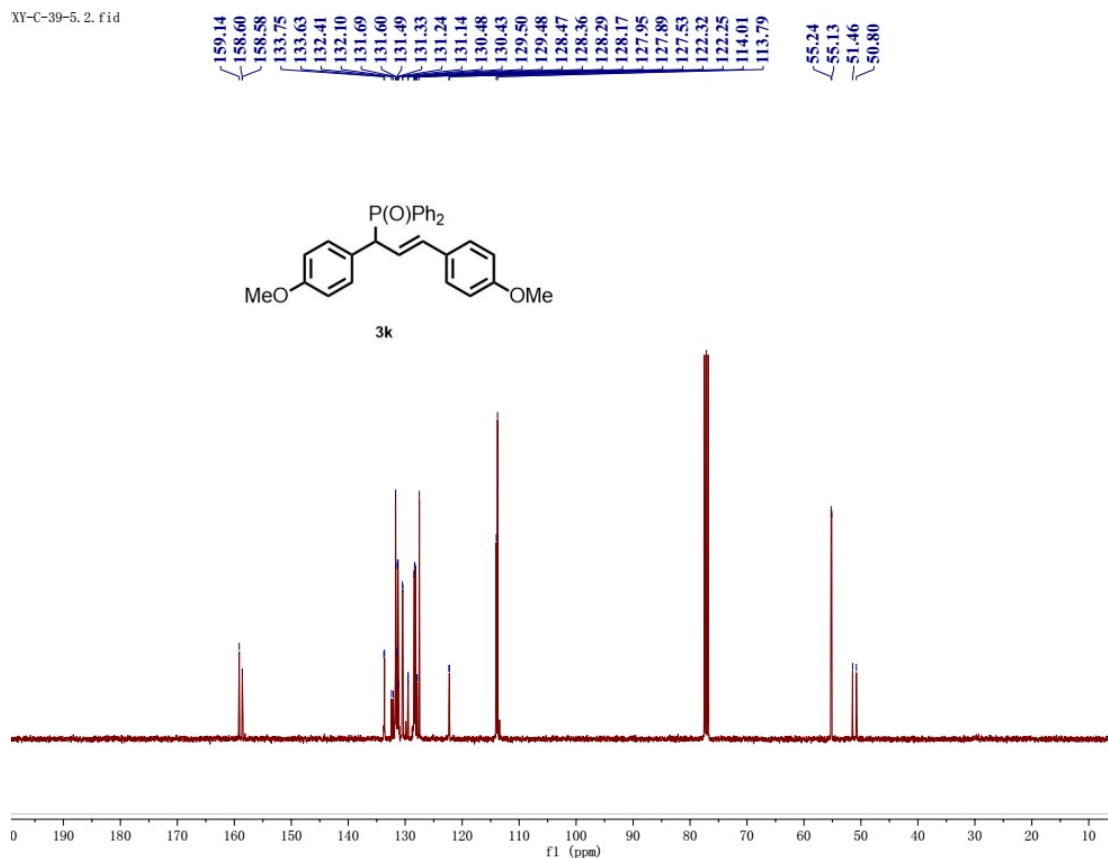

<sup>13</sup>C NMR (101 MHz, Chloroform-d) spectra for compound **3k**.

WXY-C-39-5.8.fid

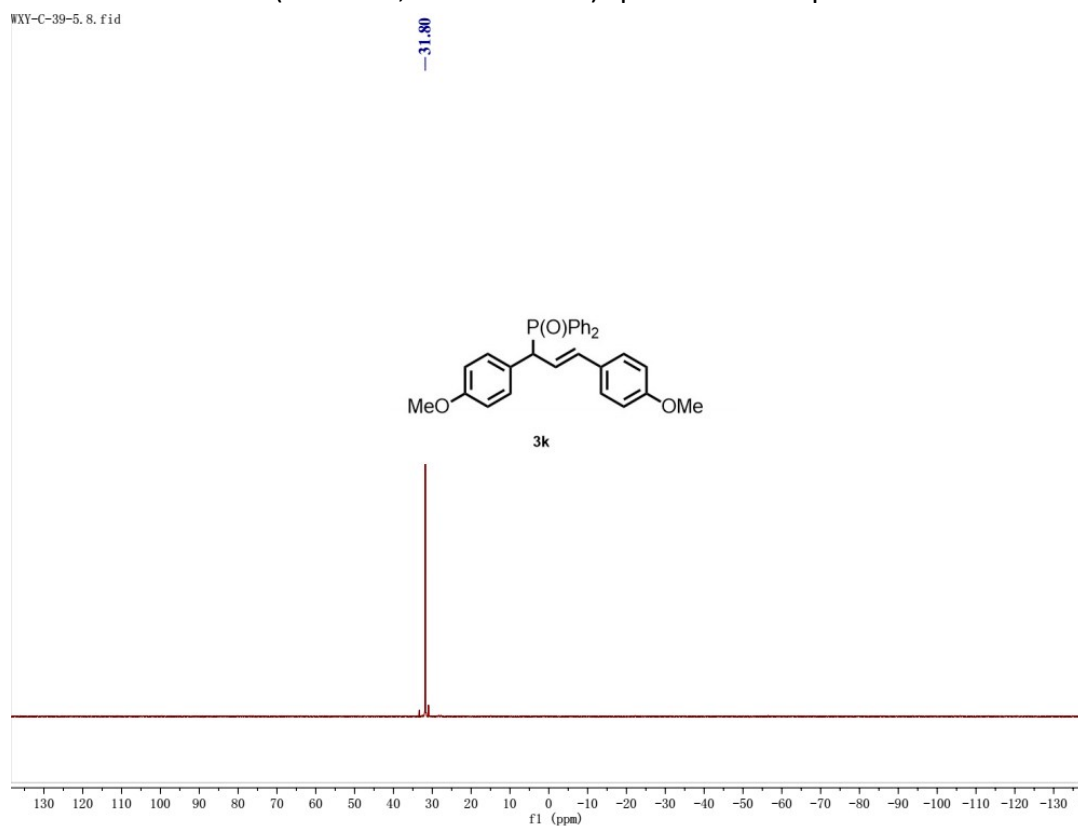

<sup>31</sup>P NMR (162 MHz, Chloroform-d) spectra for compound **3k**.

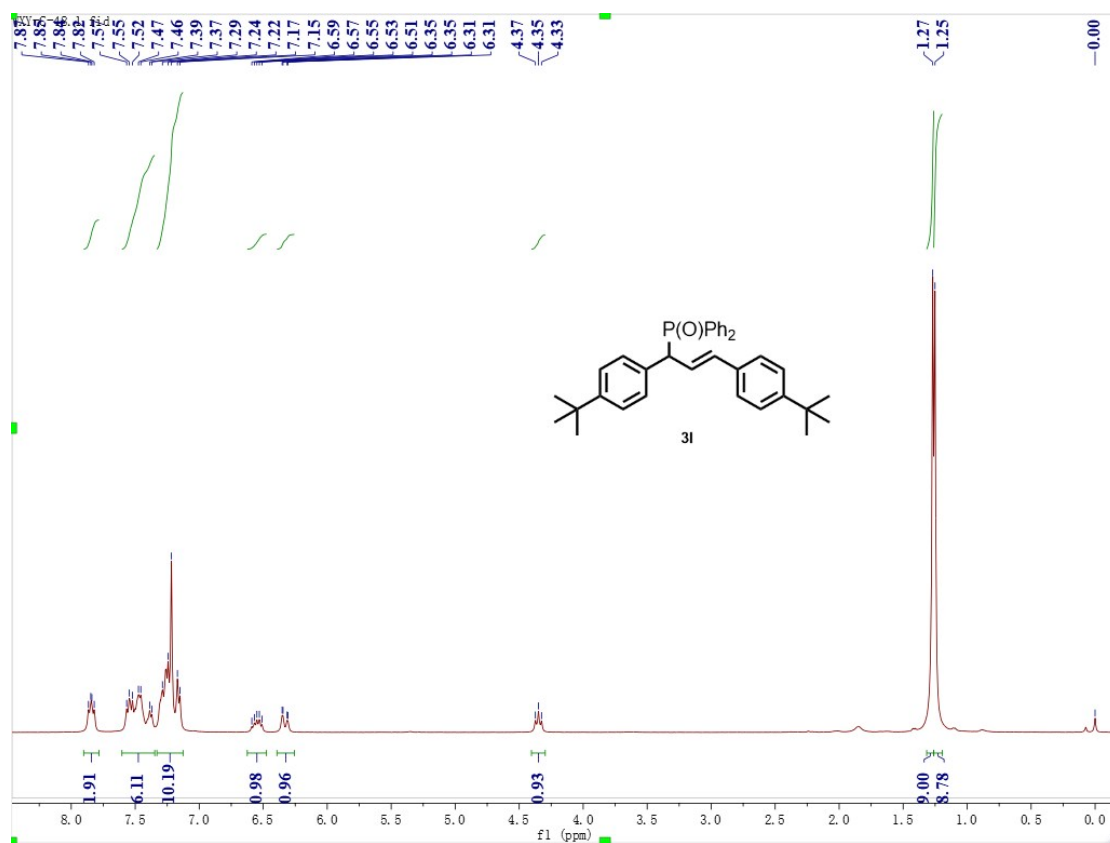

<sup>1</sup>H NMR (400 MHz, Chloroform-d) spectra for compound **3I**.

XY-C-48-1  
single pulse decoupled gated NOE

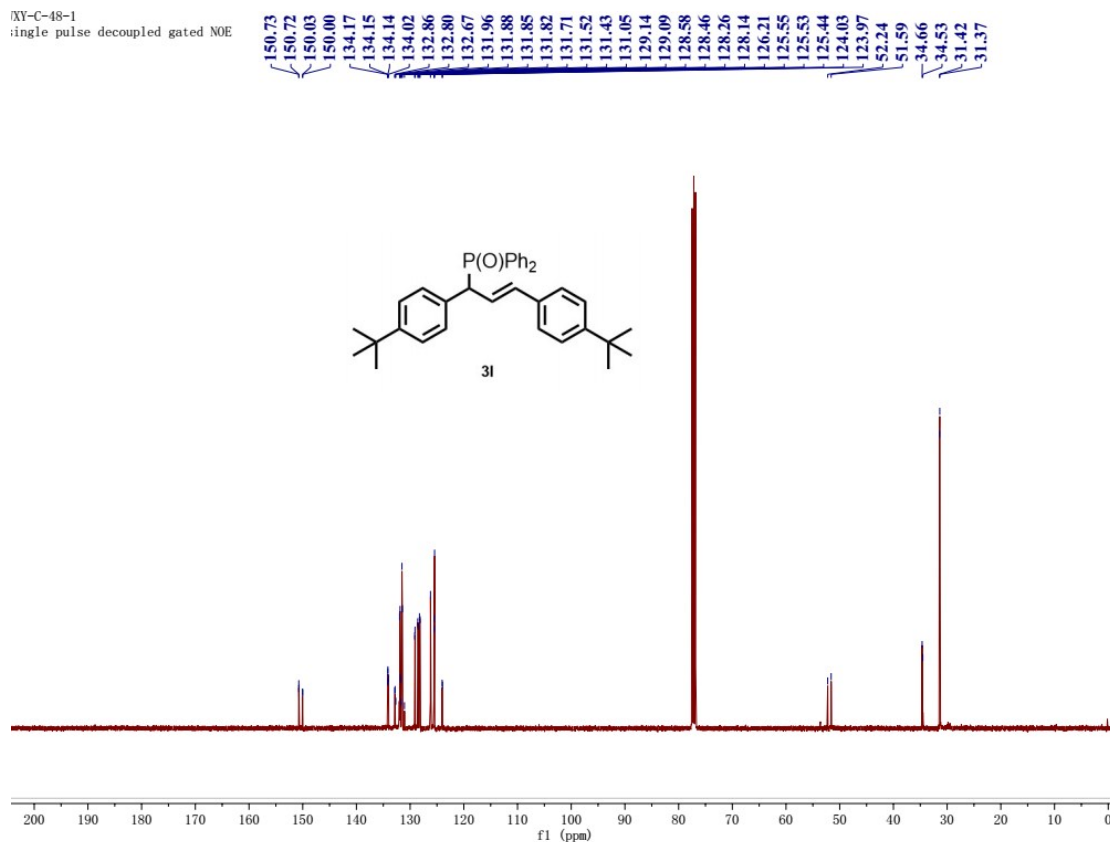

<sup>13</sup>C NMR (101 MHz, Chloroform-d) spectra for compound **3I**.

#XY-C-48  
single pulse decoupled gated NOE

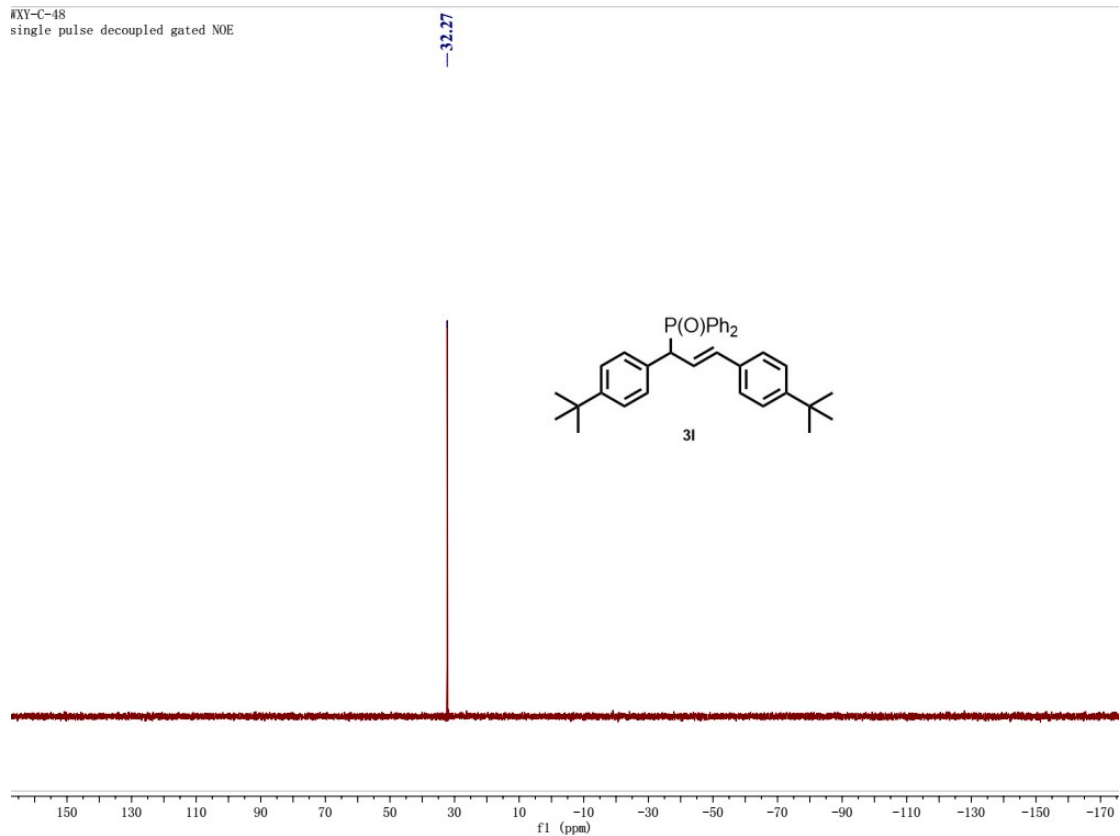

<sup>31</sup>P NMR (162 MHz, Chloroform-d) spectra for compound **3l**.

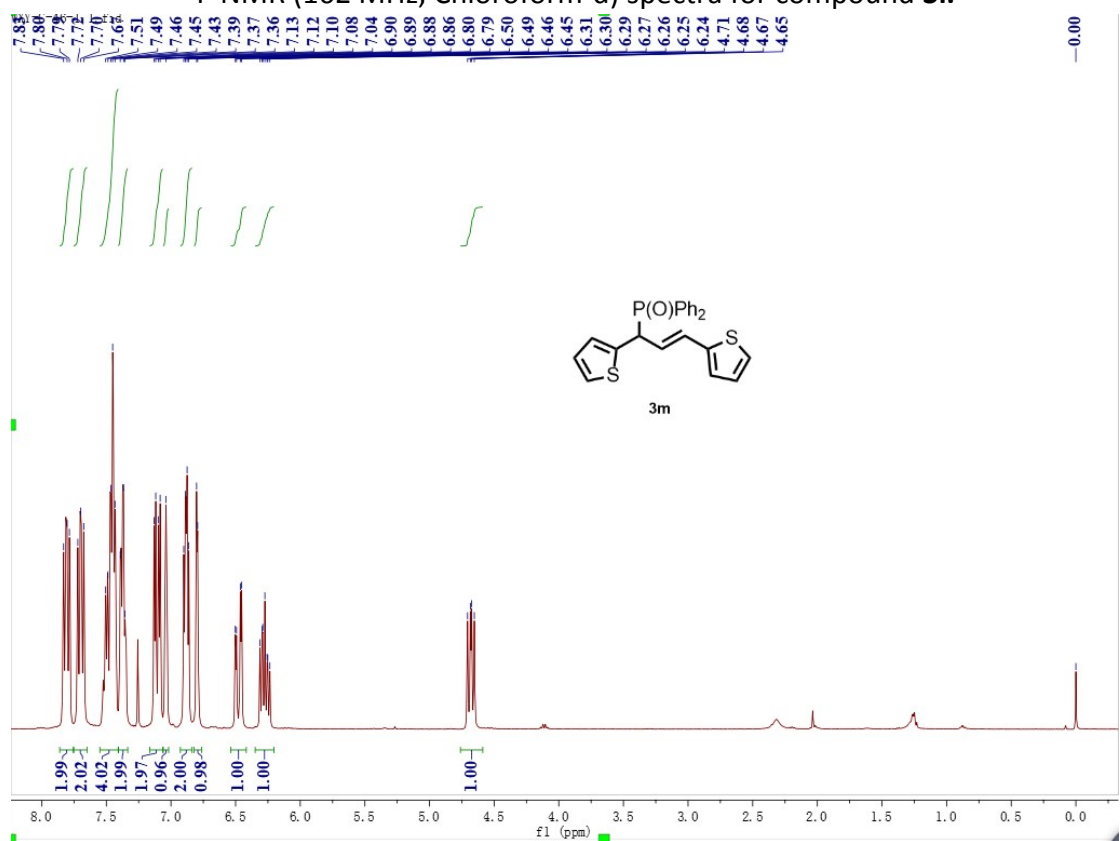

<sup>1</sup>H NMR (400 MHz, Chloroform-d) spectra for compound **3m**.

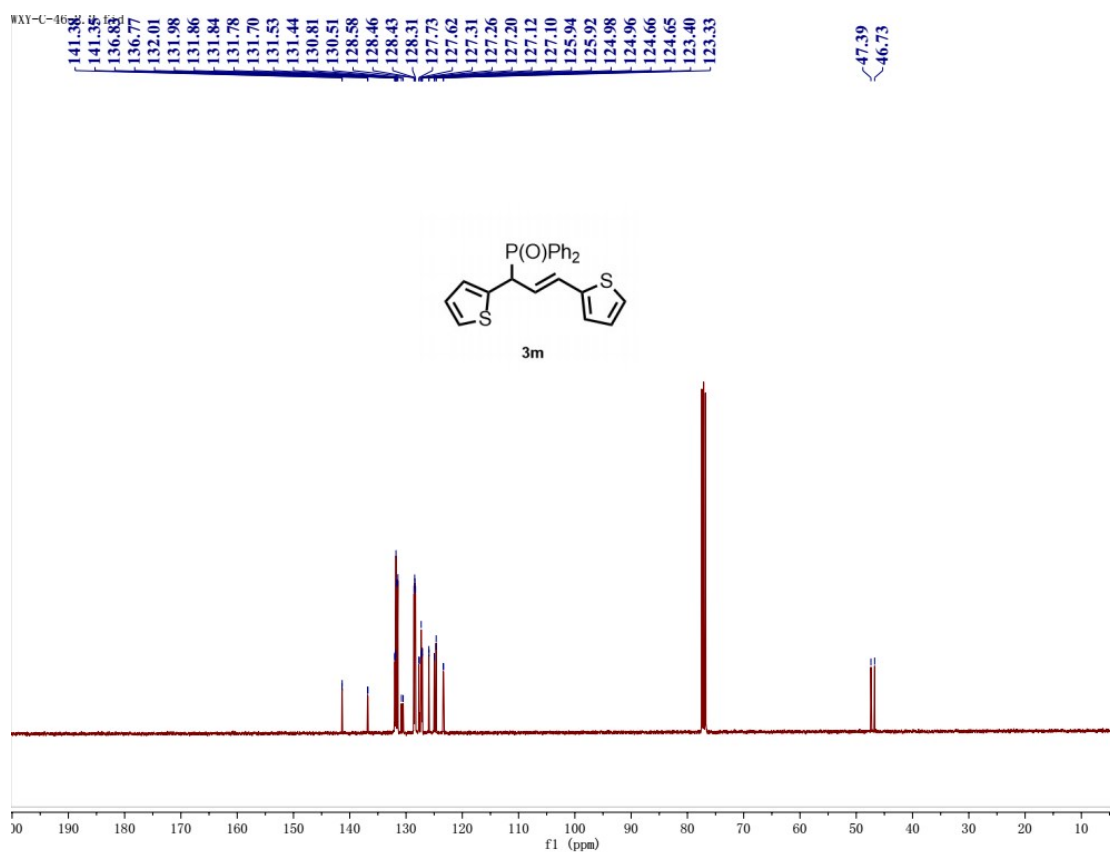

<sup>13</sup>C NMR (101 MHz, Chloroform-d) spectra for compound **3m**.

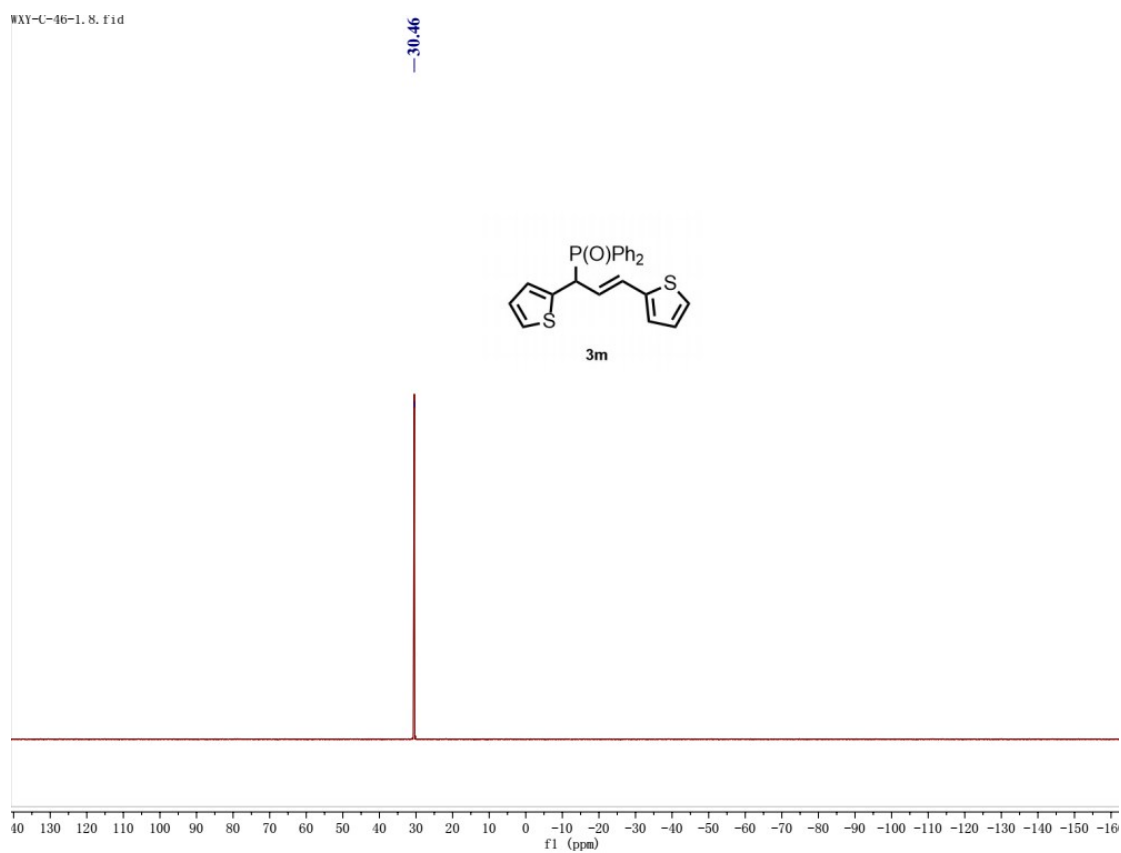

<sup>31</sup>P NMR (162 MHz, Chloroform-d) spectra for compound **3m**.

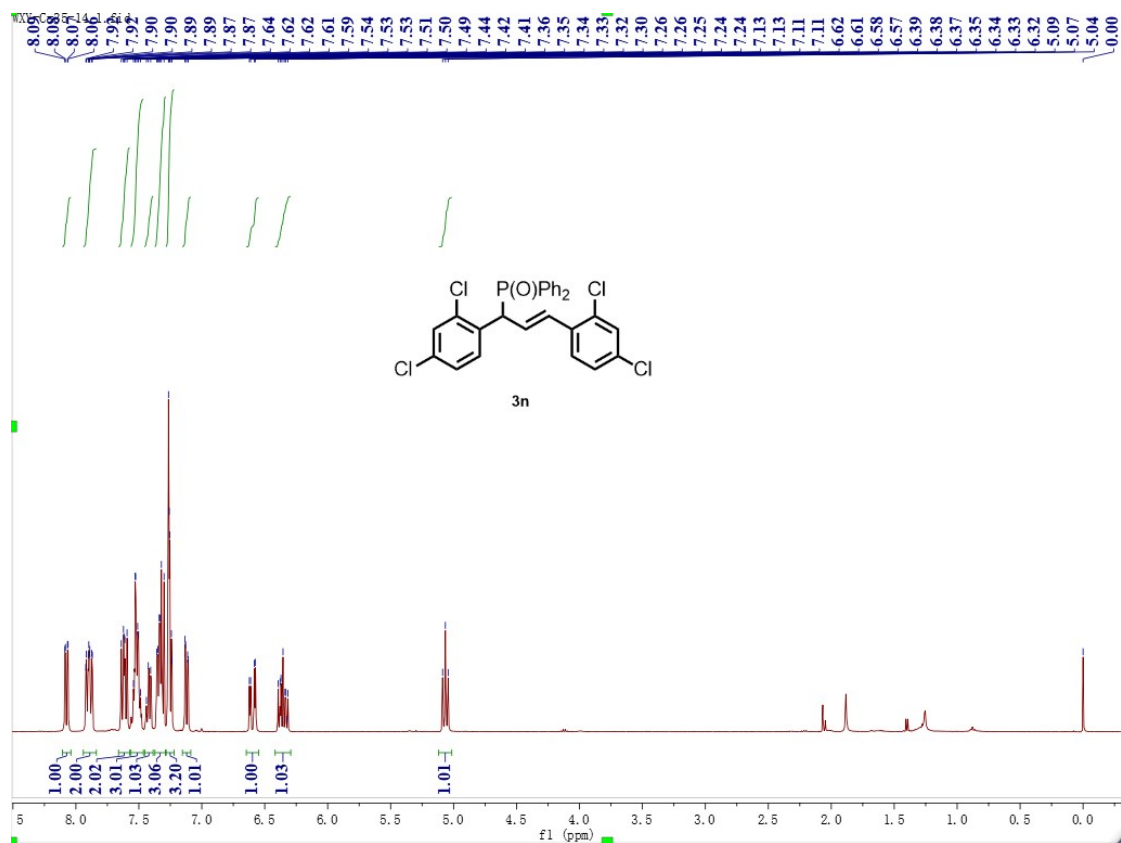

<sup>1</sup>H NMR (400 MHz, Chloroform-d) spectra for compound **3n**.

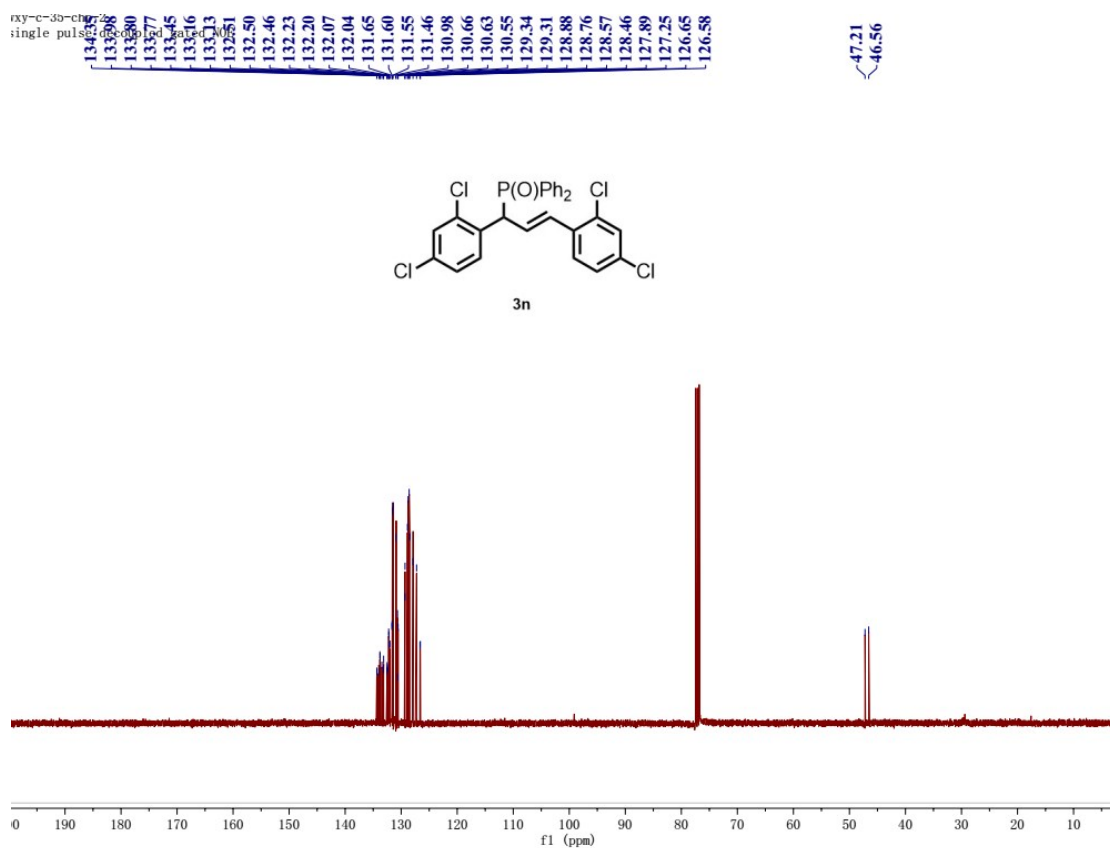

<sup>13</sup>C NMR (101 MHz, Chloroform-d) spectra for compound **3n**.



XY-C-35-22.8.fid

32.19

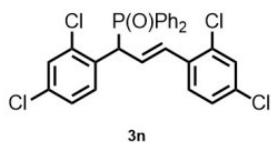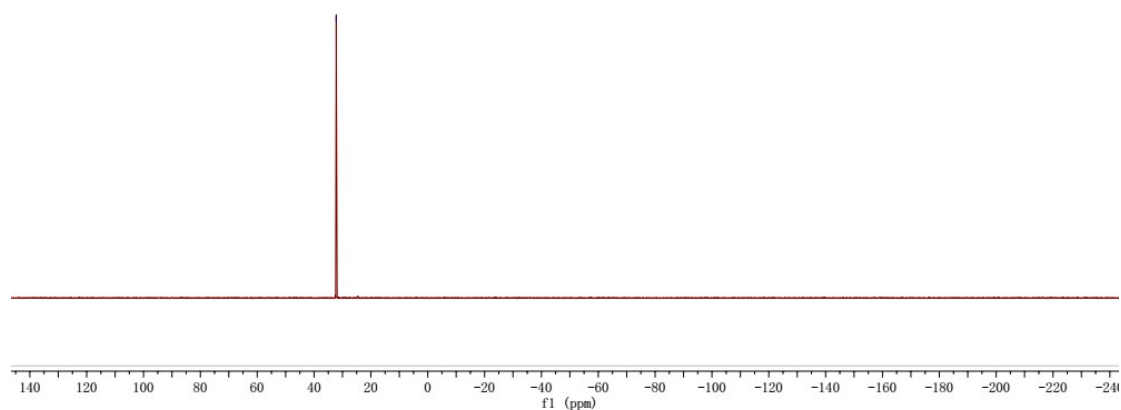

<sup>31</sup>P NMR (162 MHz, Chloroform-d) spectra for compound **3n**.

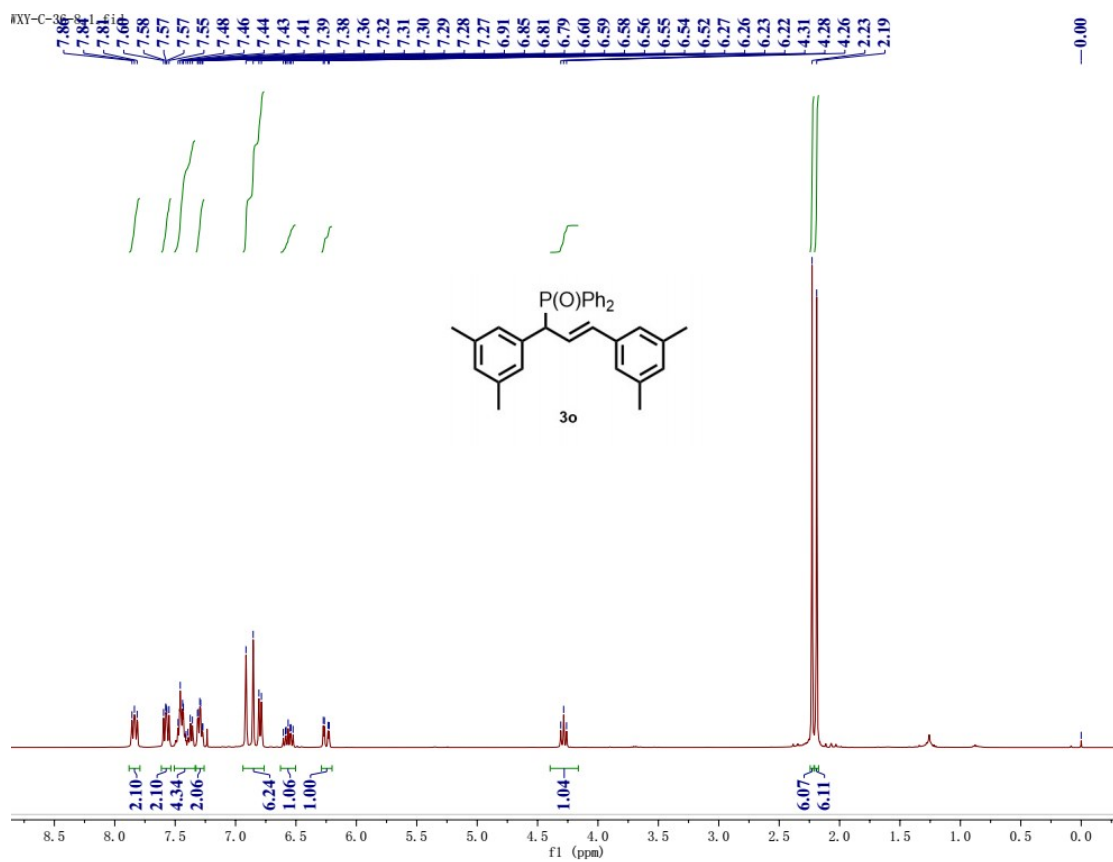

<sup>1</sup>H NMR (400 MHz, Chloroform-d) spectra for compound **3o**.

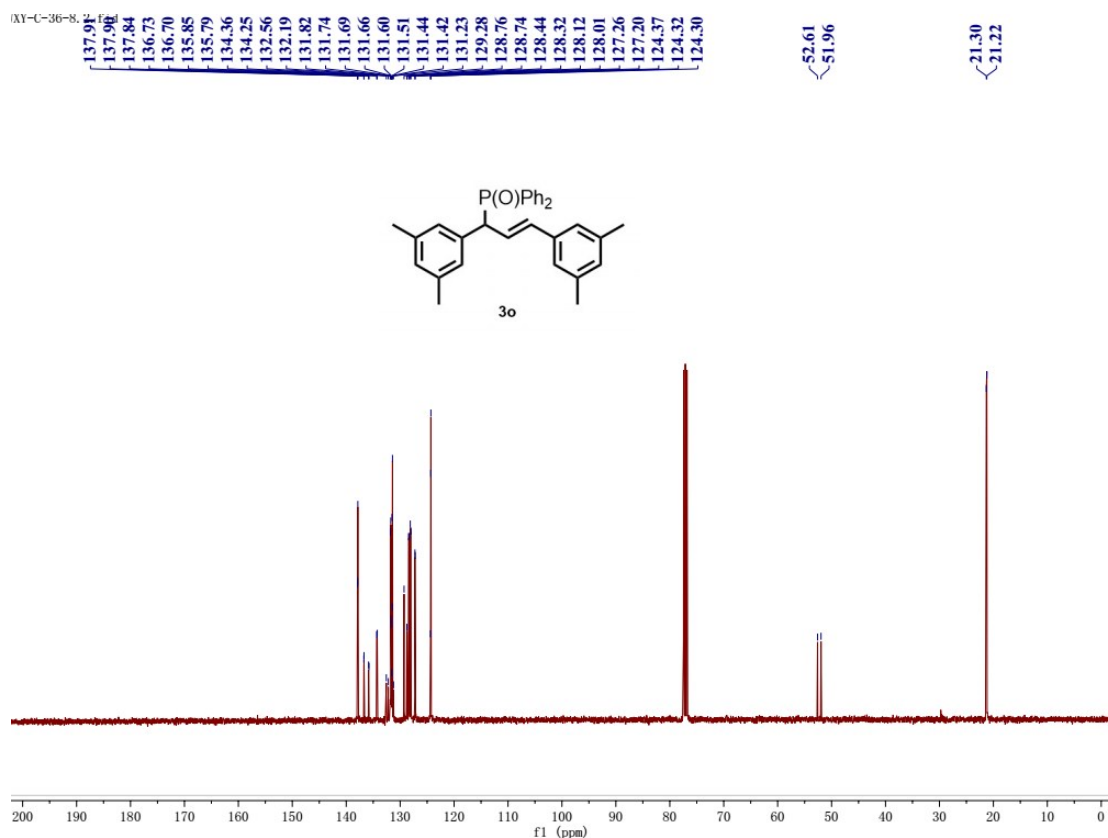

**13C NMR** (101 MHz, Chloroform-d) spectra for compound **3o**.

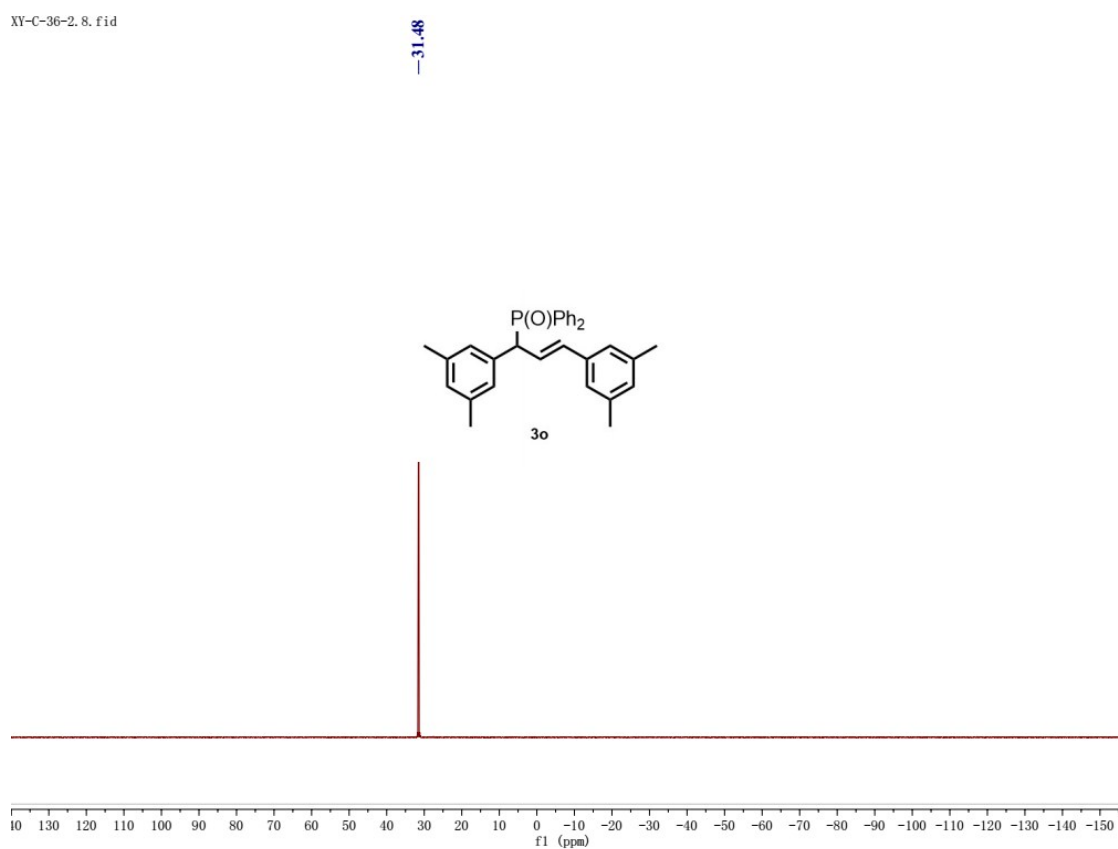

**31P NMR** (162 MHz, Chloroform-d) spectra for compound **3o**.

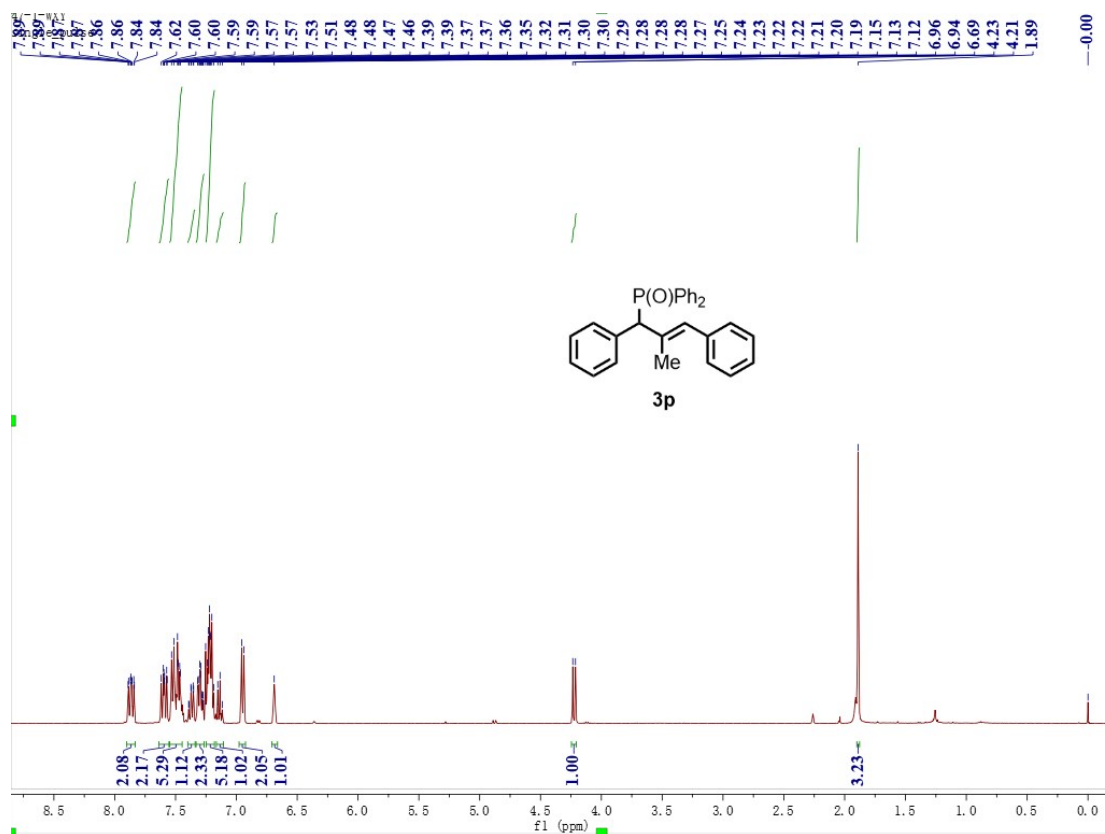

<sup>1</sup>H NMR (400 MHz, Chloroform-d) spectra for compound **3p**.

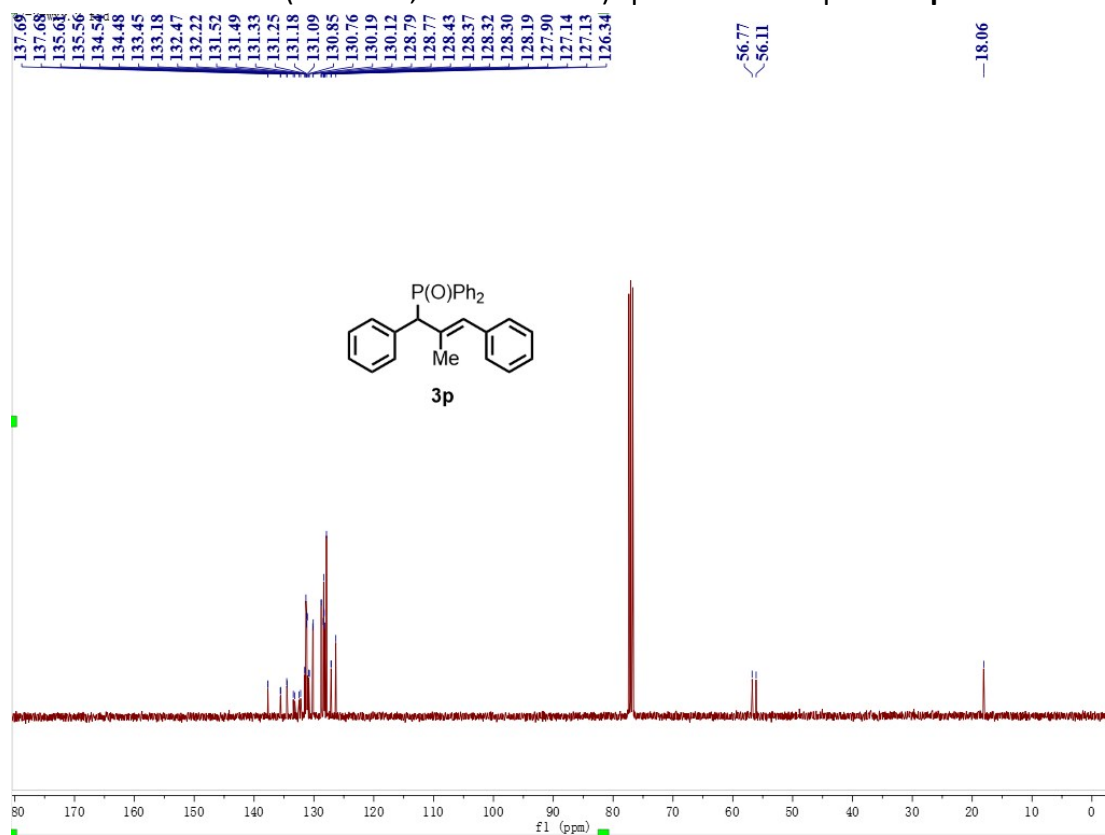

<sup>13</sup>C NMR (101 MHz, Chloroform-d) spectra for compound **3p**.

xy-c-47=chp  
single\_pulse

-32.46

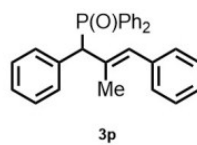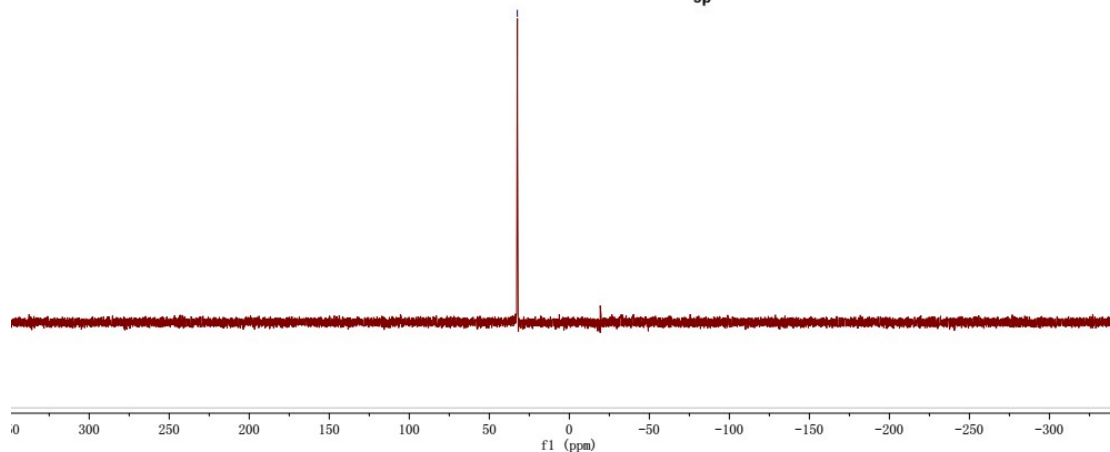

$^{31}\text{P}$  NMR (162 MHz, Chloroform-d) spectra for compound **3p**.

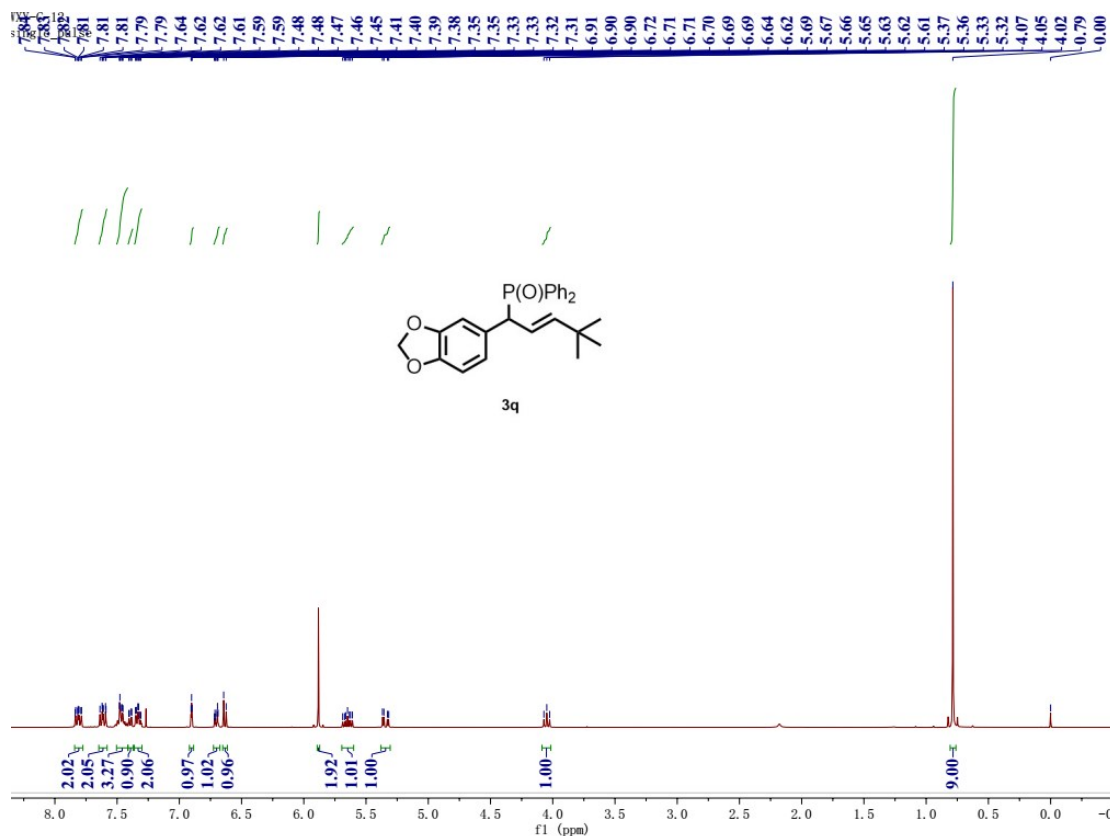

$^1\text{H}$  NMR (400 MHz, Chloroform-d) spectra for compound **3q**.

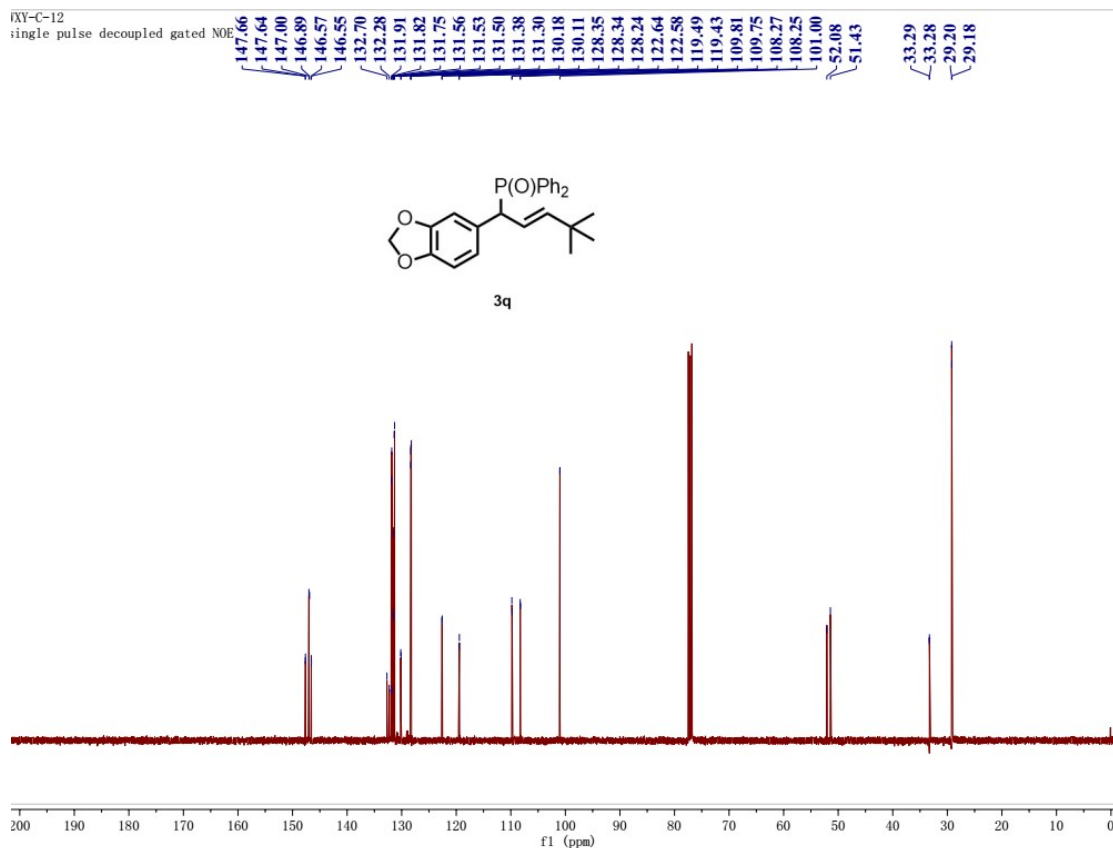

$^{13}\text{C}$  NMR (101 MHz, Chloroform-d) spectra for compound **3q**.

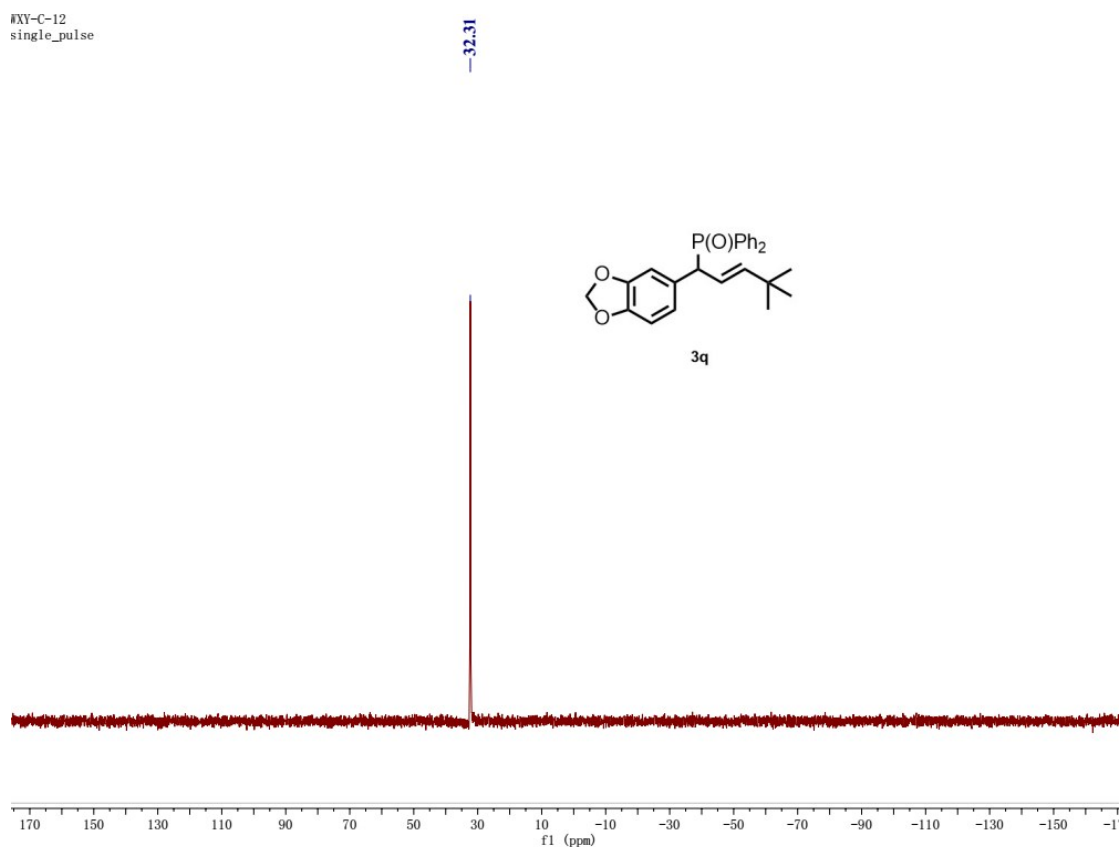

$^{31}\text{P}$  NMR (162 MHz, Chloroform-d) spectra for compound **3q**.

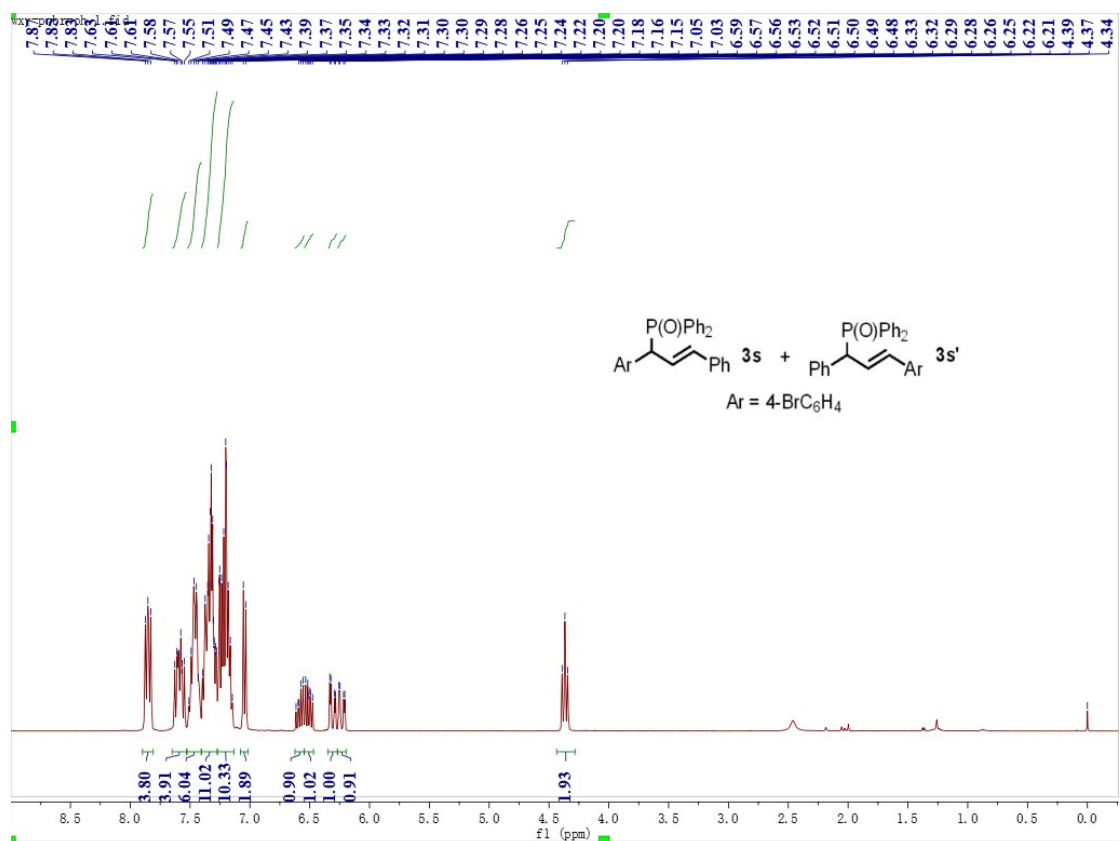

**<sup>1</sup>H NMR (400 MHz, Chloroform-d) spectra for compound **3s** and **3s'** (**3s/3s'** = **1/1**).**

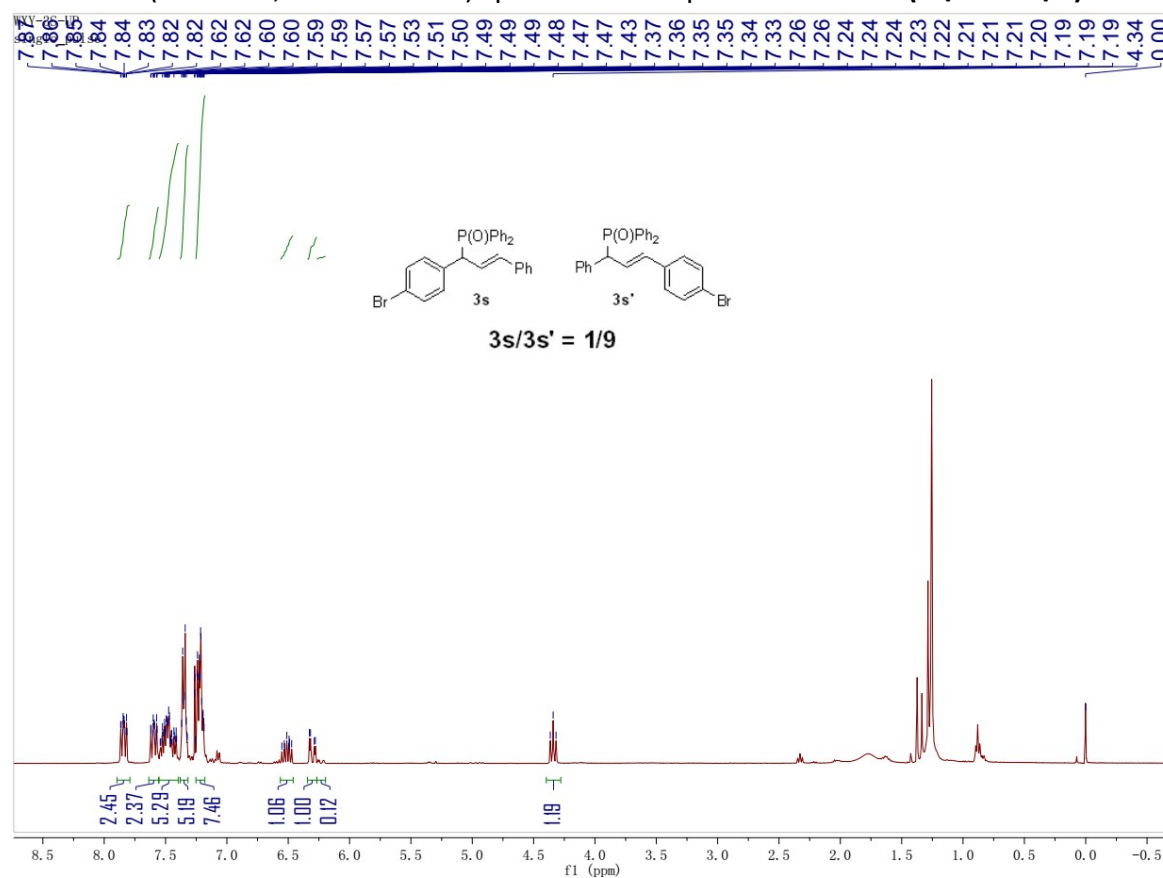

**<sup>1</sup>H NMR (400 MHz, Chloroform-d) spectra for compound **3s** and **3s'** (**3s/3s'** = **1/9**).**

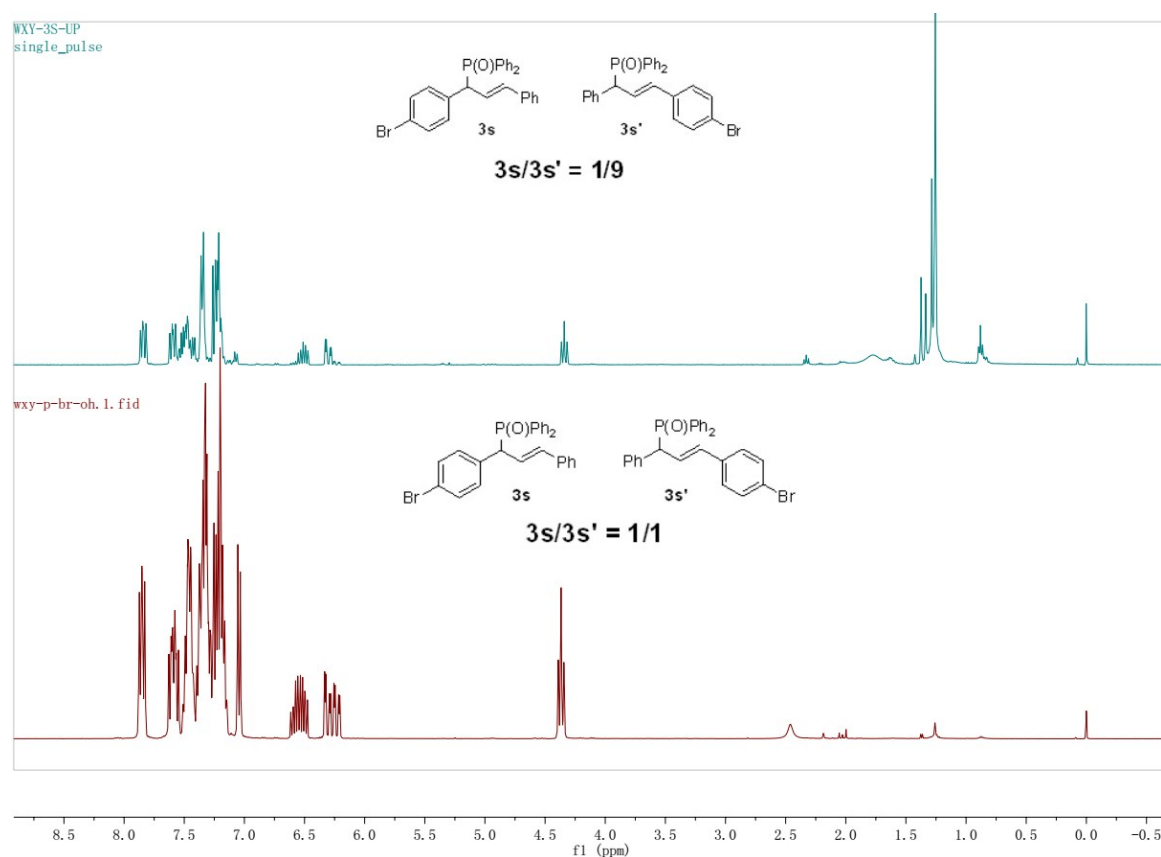

$^1\text{H}$  NMR (400 MHz, Chloroform-d) spectra for compound **3s** and **3s'** (comparison).

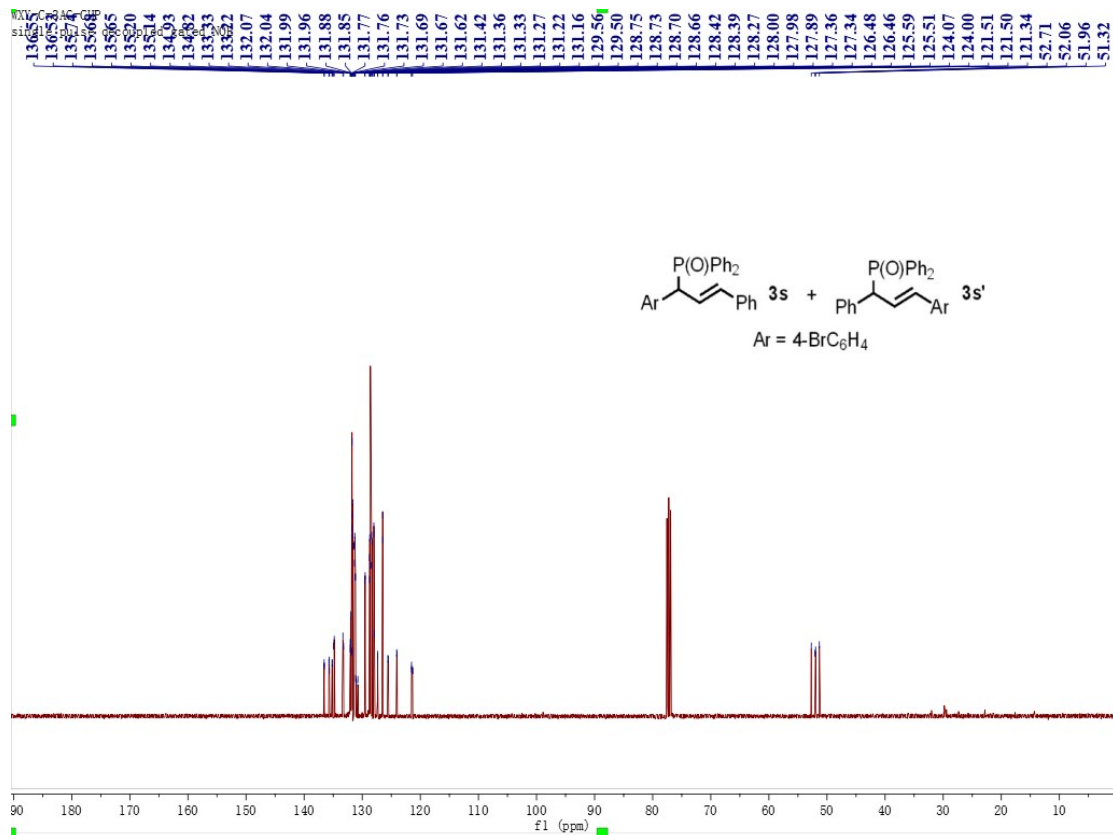

$^{13}\text{C}$  NMR (101 MHz, Chloroform-d) spectra for compound **3s** and **3s'** ( $3s/3s' = 1/1$ ).

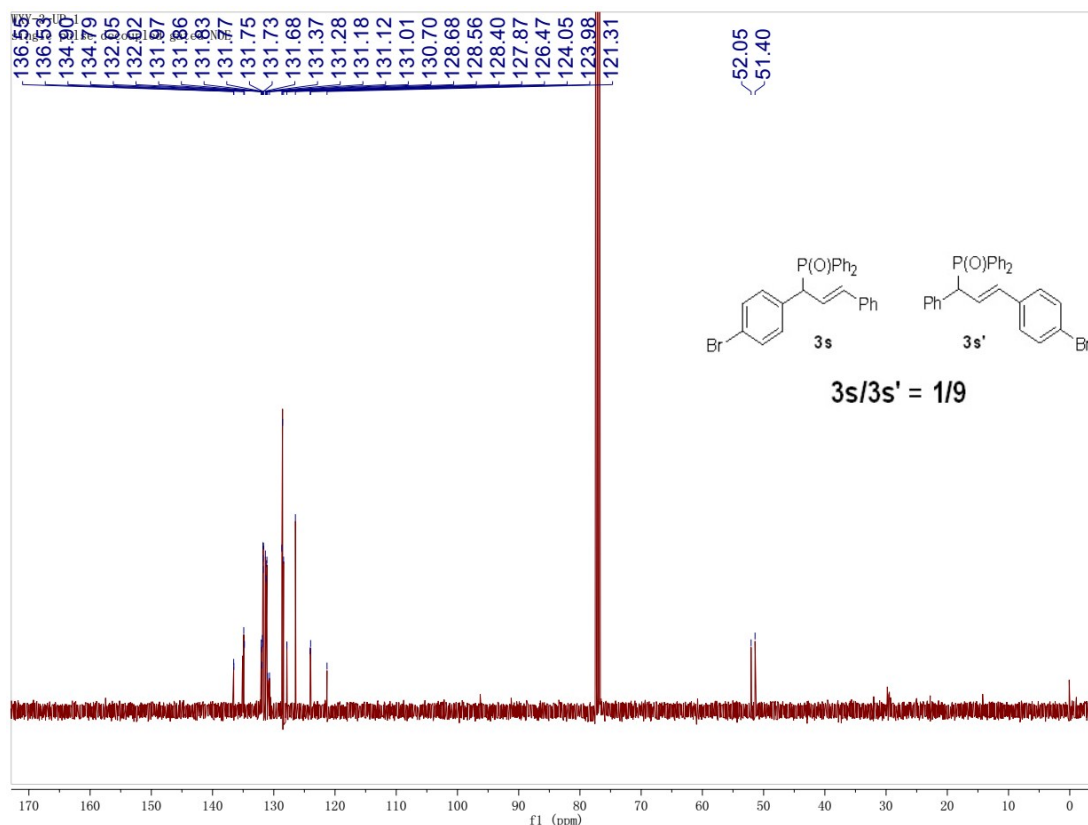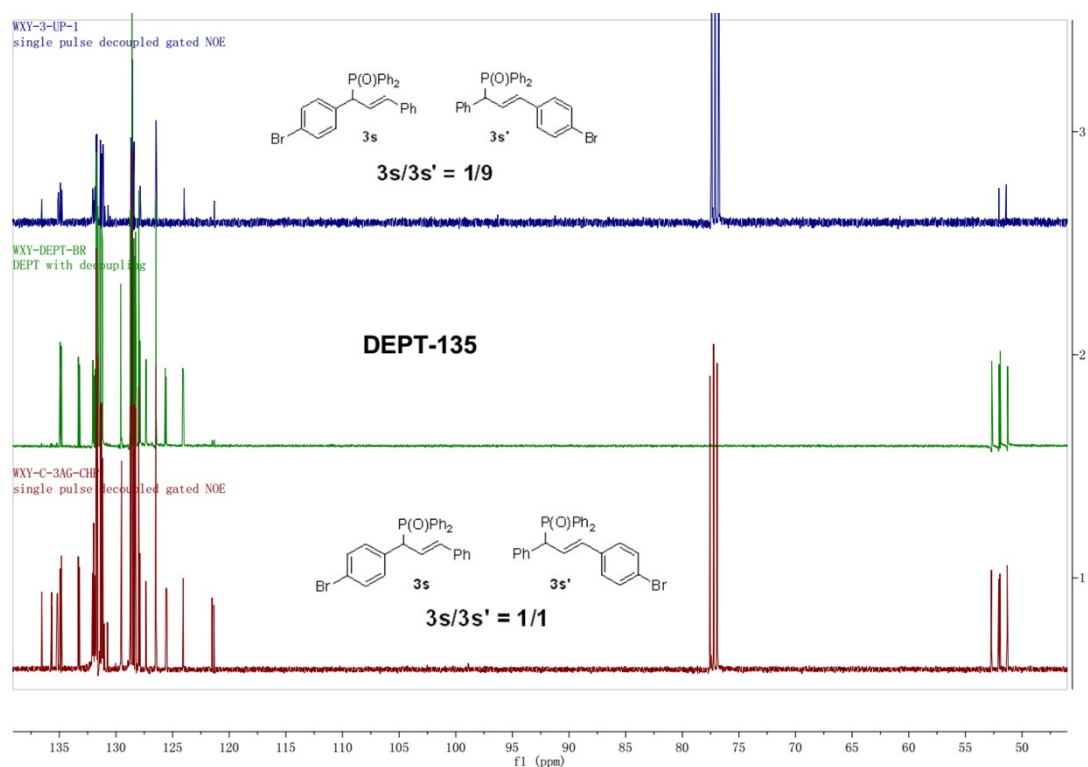



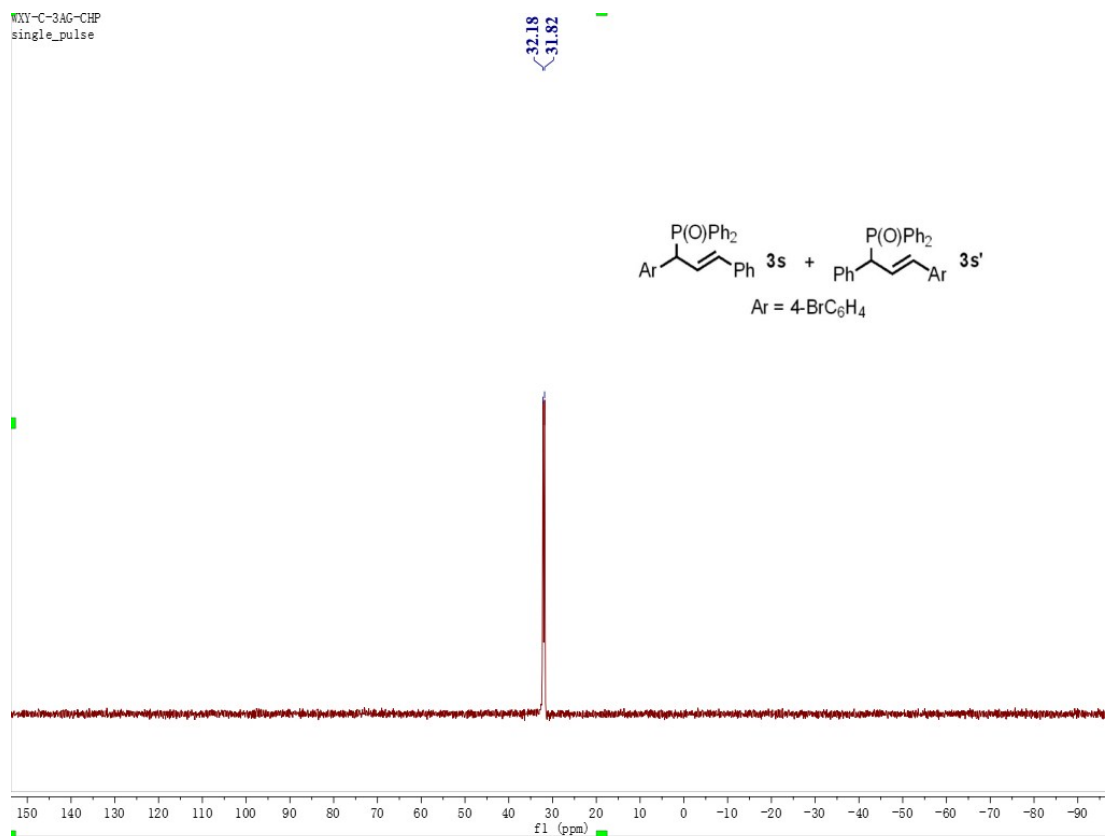

<sup>31</sup>P NMR (162 MHz, Chloroform-d) spectra for compound **3s** and **3s'** (**3s/3s'** = 1/1).

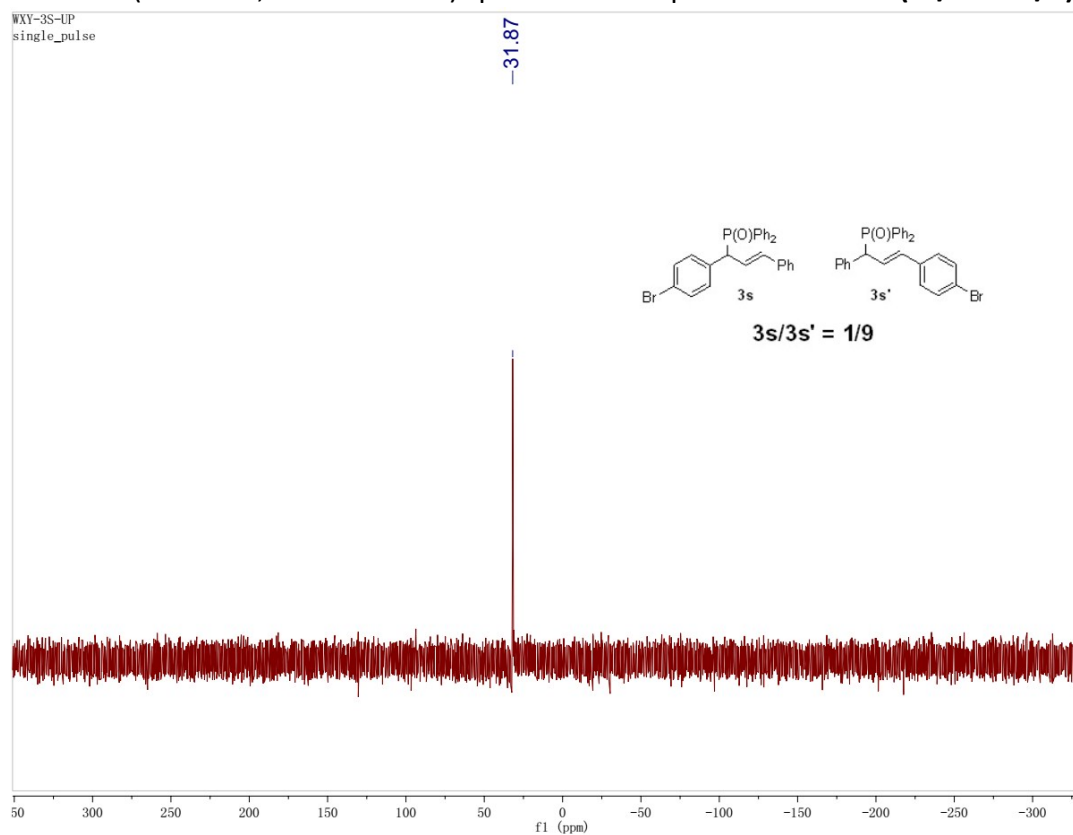

<sup>31</sup>P NMR (162 MHz, Chloroform-d) spectra for compound **3s** and **3s'** (**3s/3s'** = 1/9).

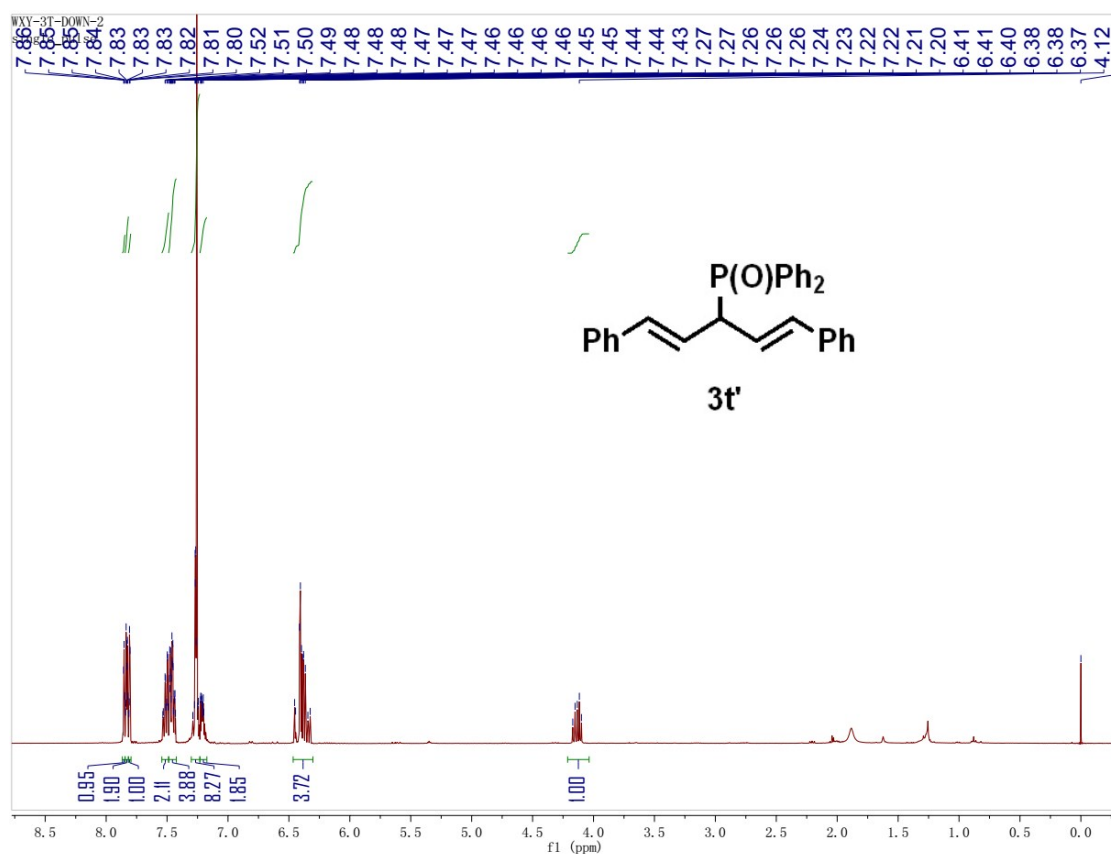

<sup>1</sup>H NMR (400 MHz, Chloroform-d) spectra for compound **3t'**.

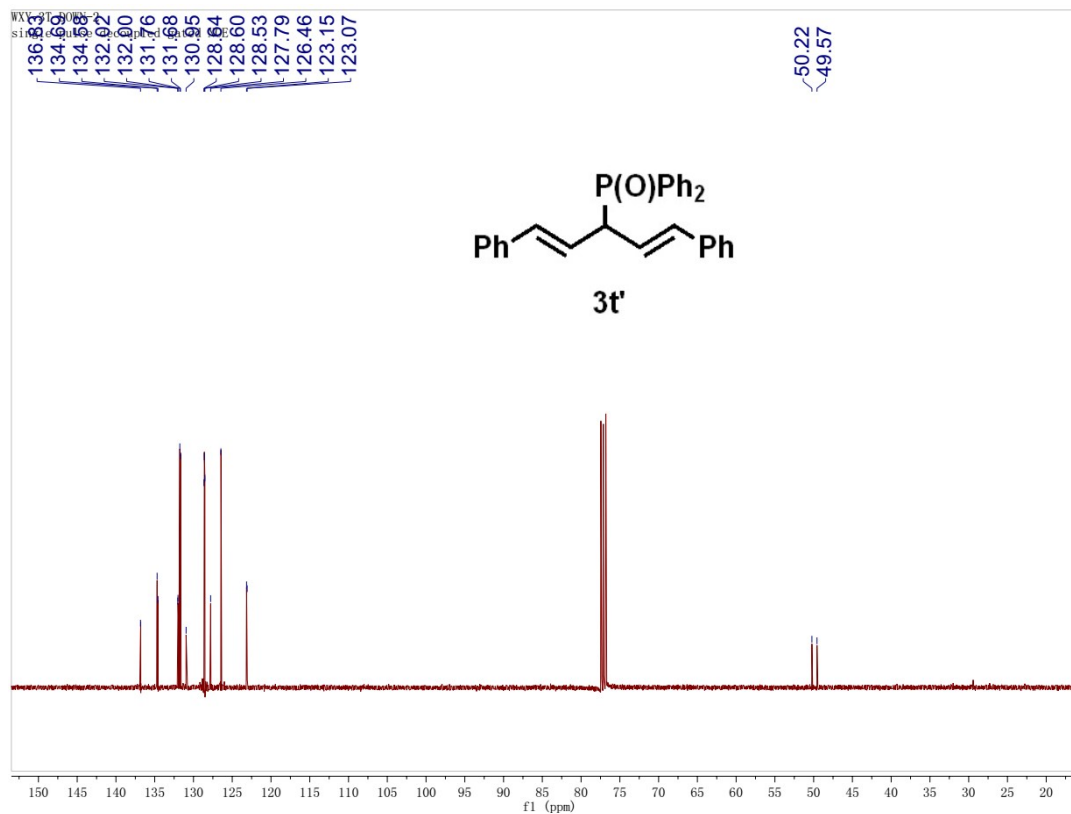

<sup>13</sup>C NMR (101 MHz, Chloroform-d) spectra for compound **3t'**.

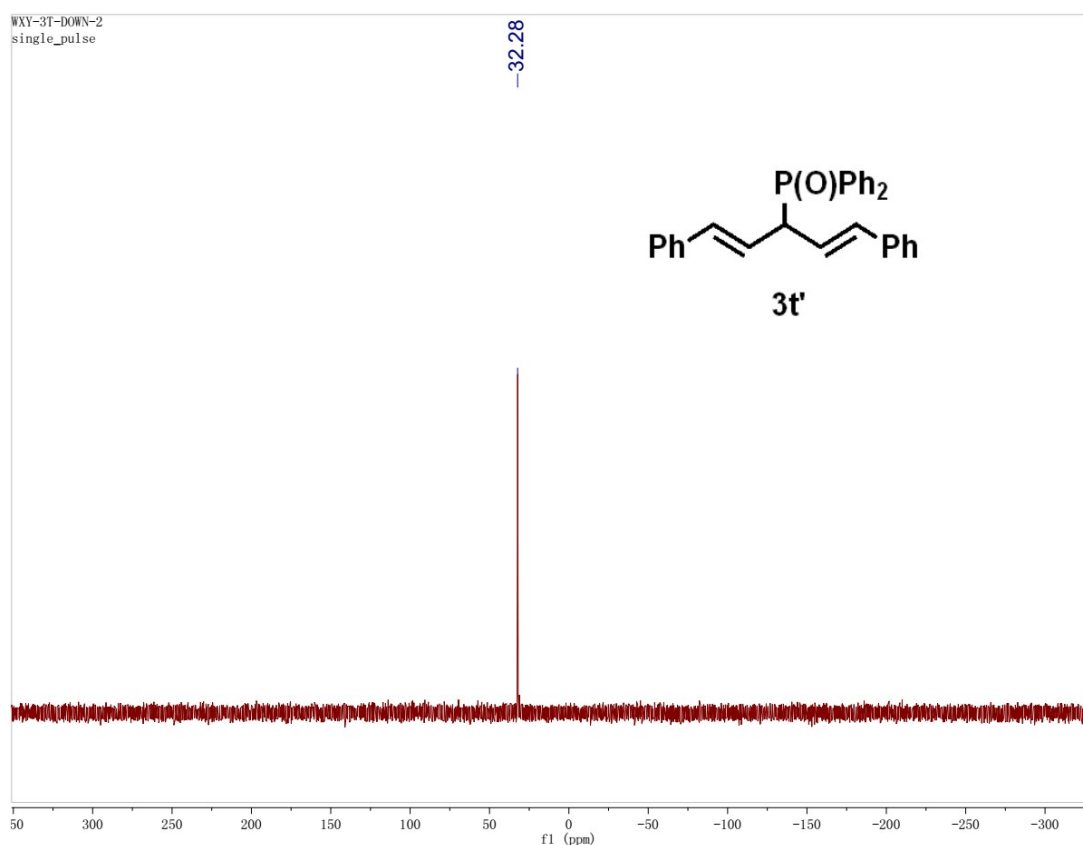

<sup>31</sup>P NMR (162 MHz, Chloroform-d) spectra for compound **3t'**.

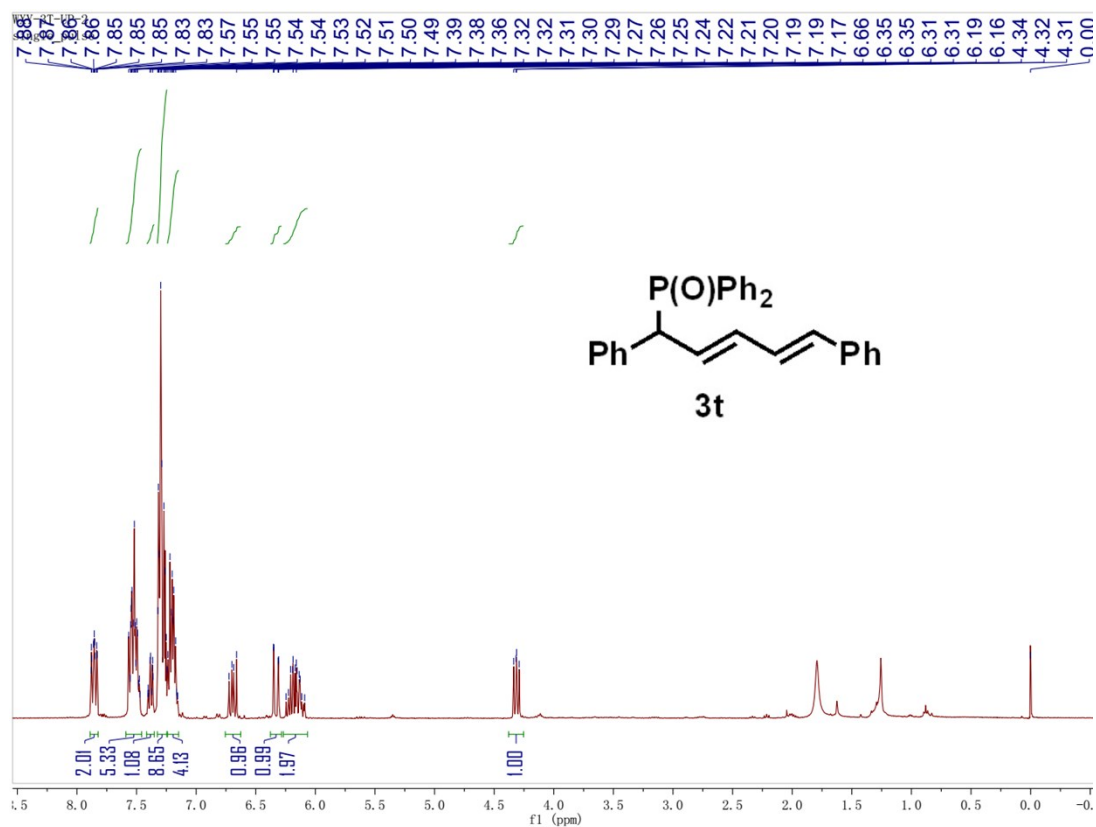

<sup>1</sup>H NMR (400 MHz, Chloroform-d) spectra for compound **3t**.

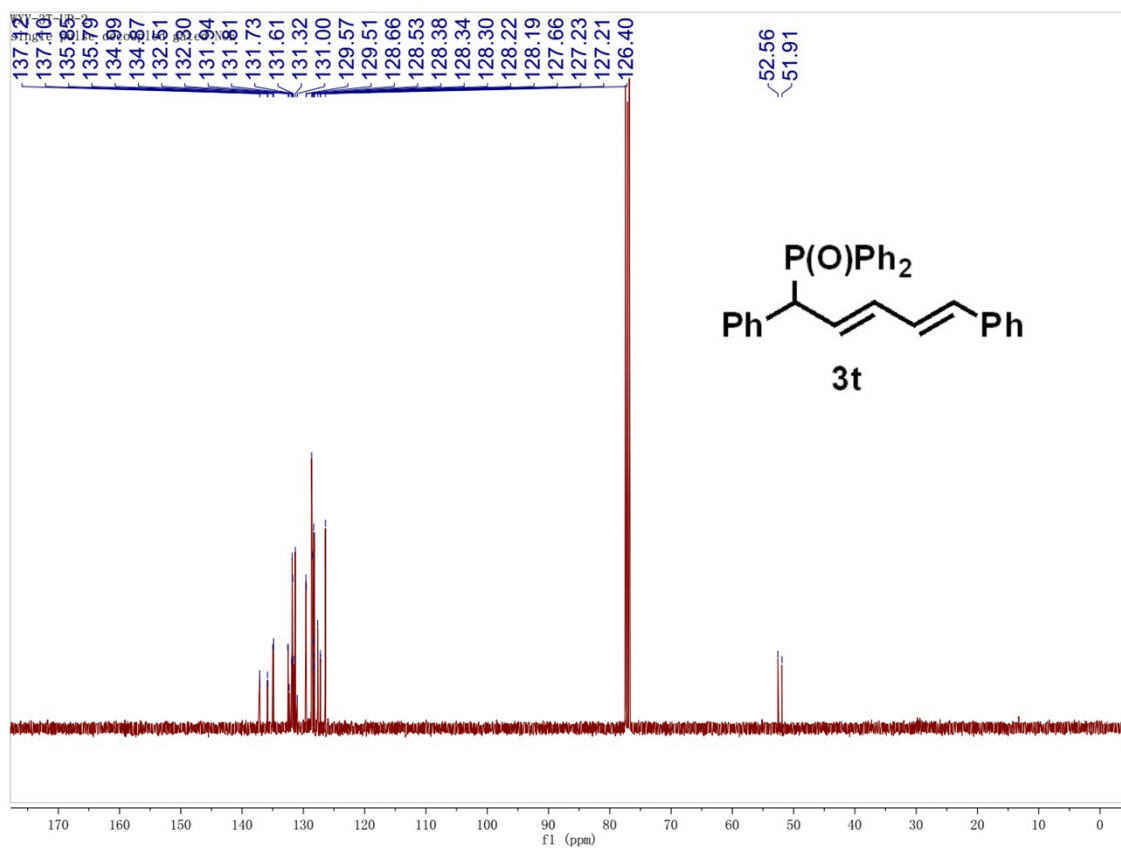

<sup>13</sup>C NMR (101 MHz, Chloroform-d) spectra for compound **3t**.

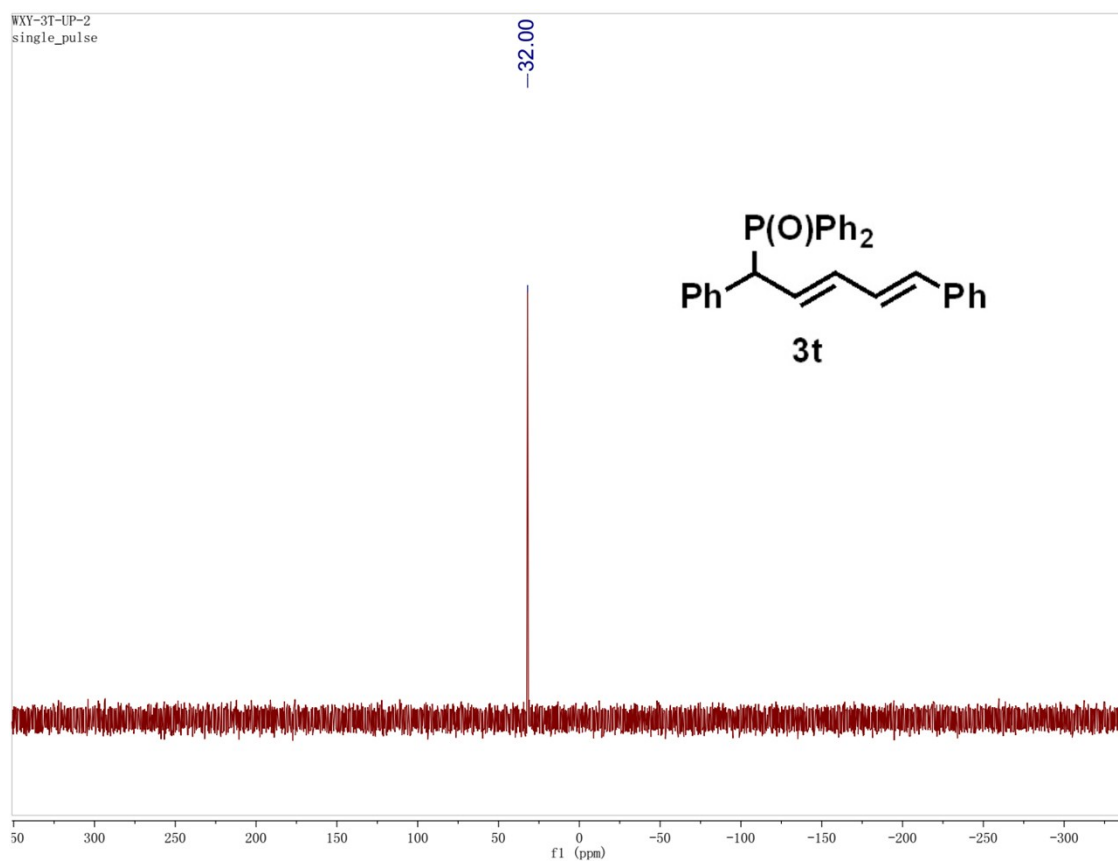

<sup>31</sup>P NMR (162 MHz, Chloroform-d) spectra for compound **3t**.

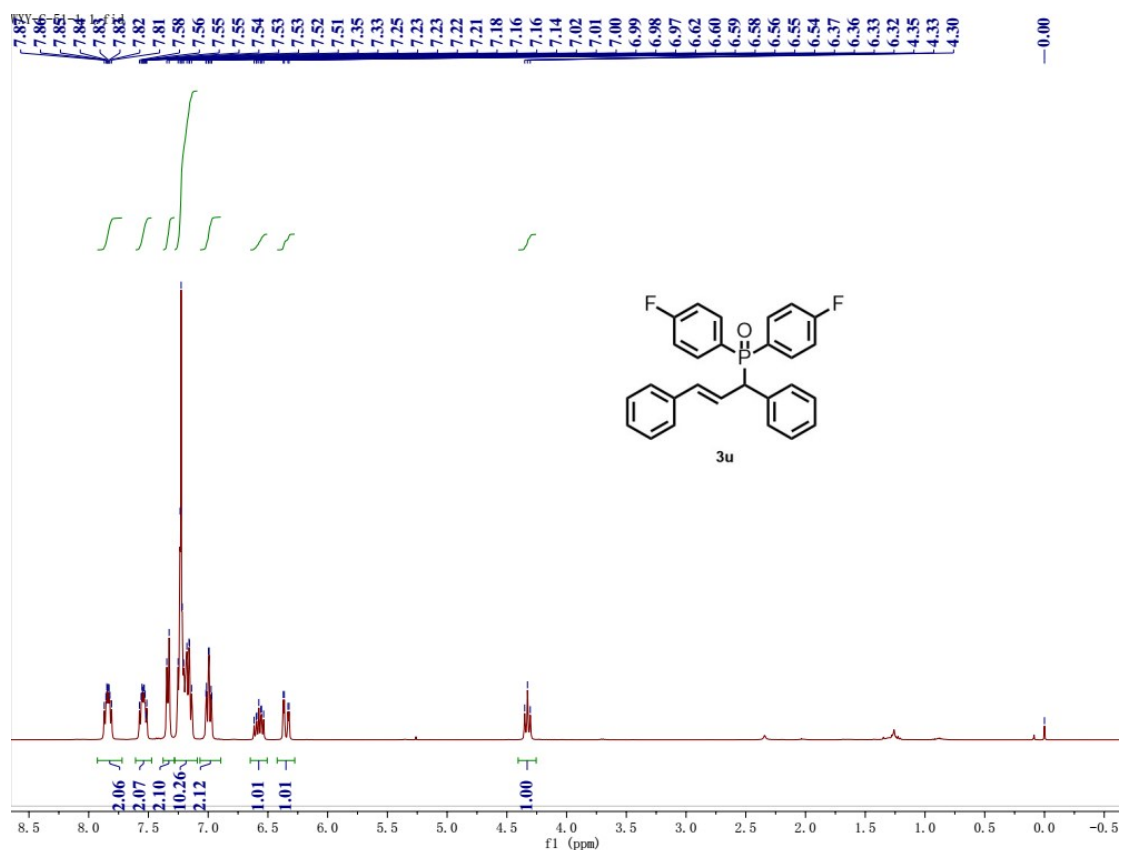

<sup>1</sup>H NMR (400 MHz, Chloroform-d) spectra for compound **3u**.

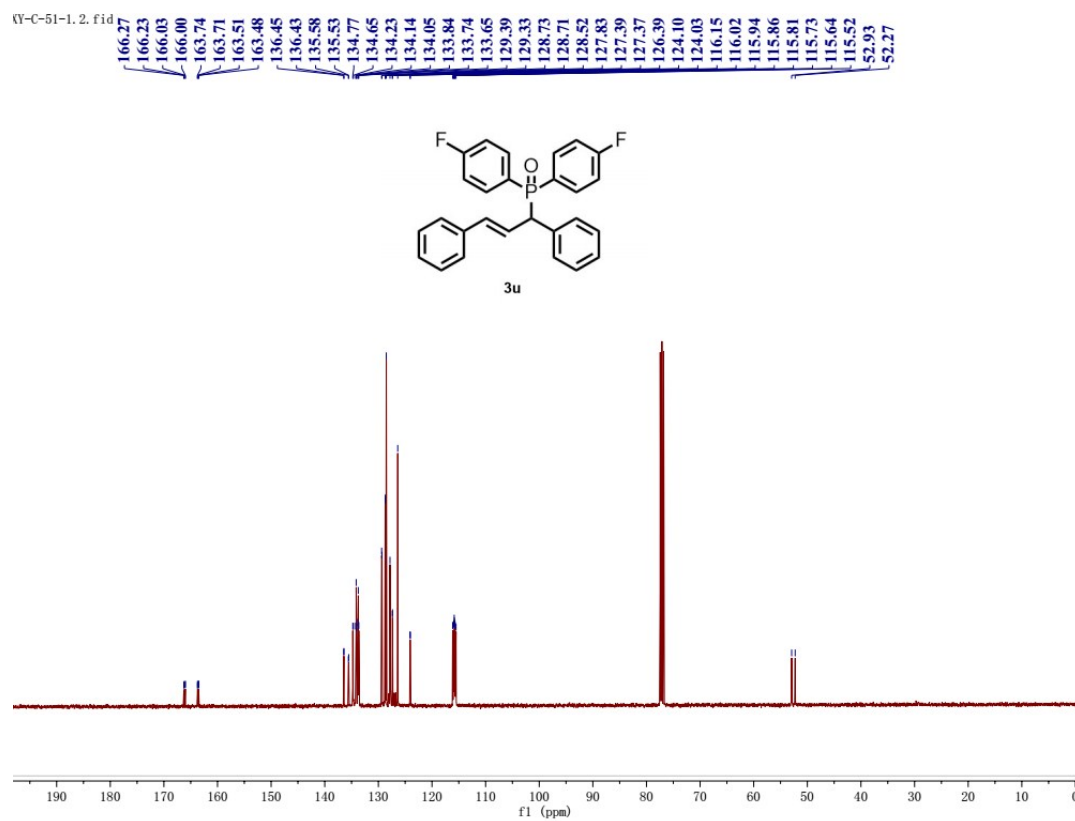

<sup>13</sup>C NMR (101 MHz, Chloroform-d) spectra for compound **3u**.

XY-C-51-1.8.fid

30.32

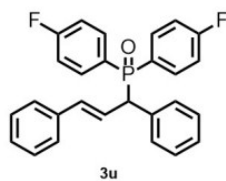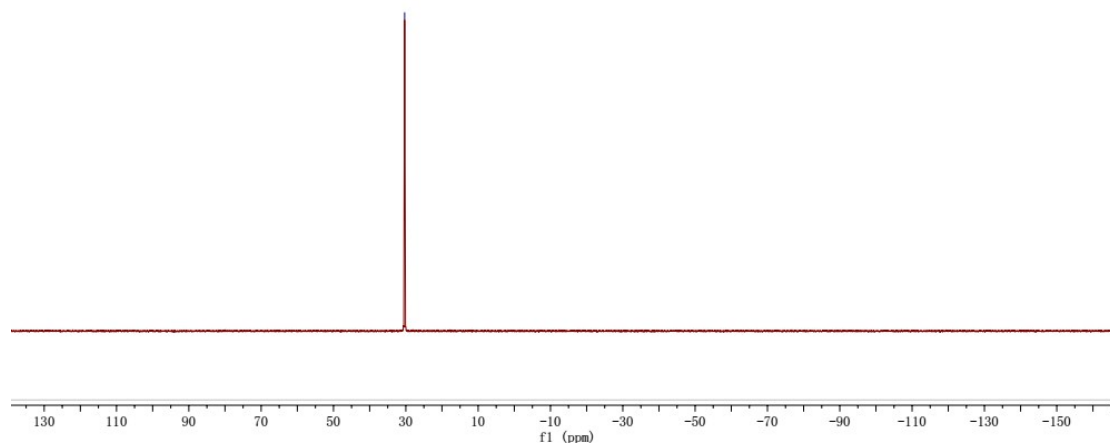

$^{31}\text{P}$  NMR (162 MHz, Chloroform- $d_3$ ) spectra for compound **3u**.

WXY-51-F  
single\_pulse

106.42  
106.67

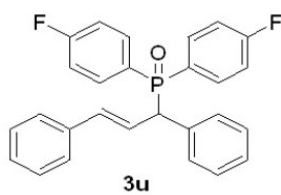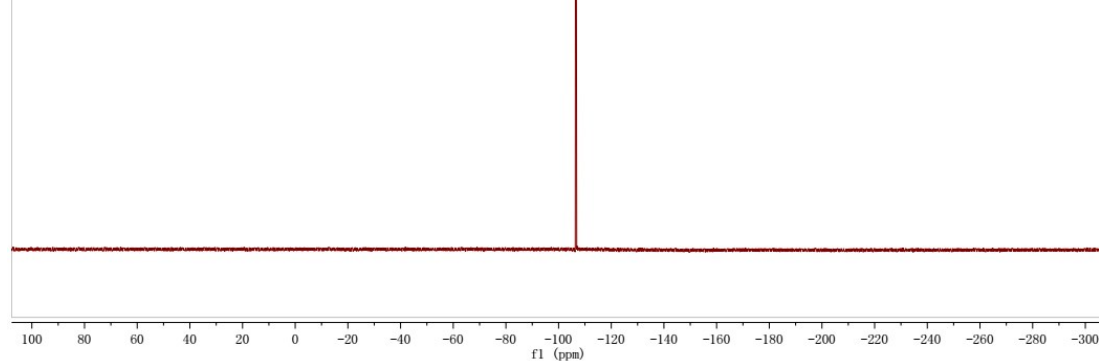

$^{19}\text{F}$  NMR (376 MHz, Chloroform- $d_3$ ) spectra for compound **3u**.

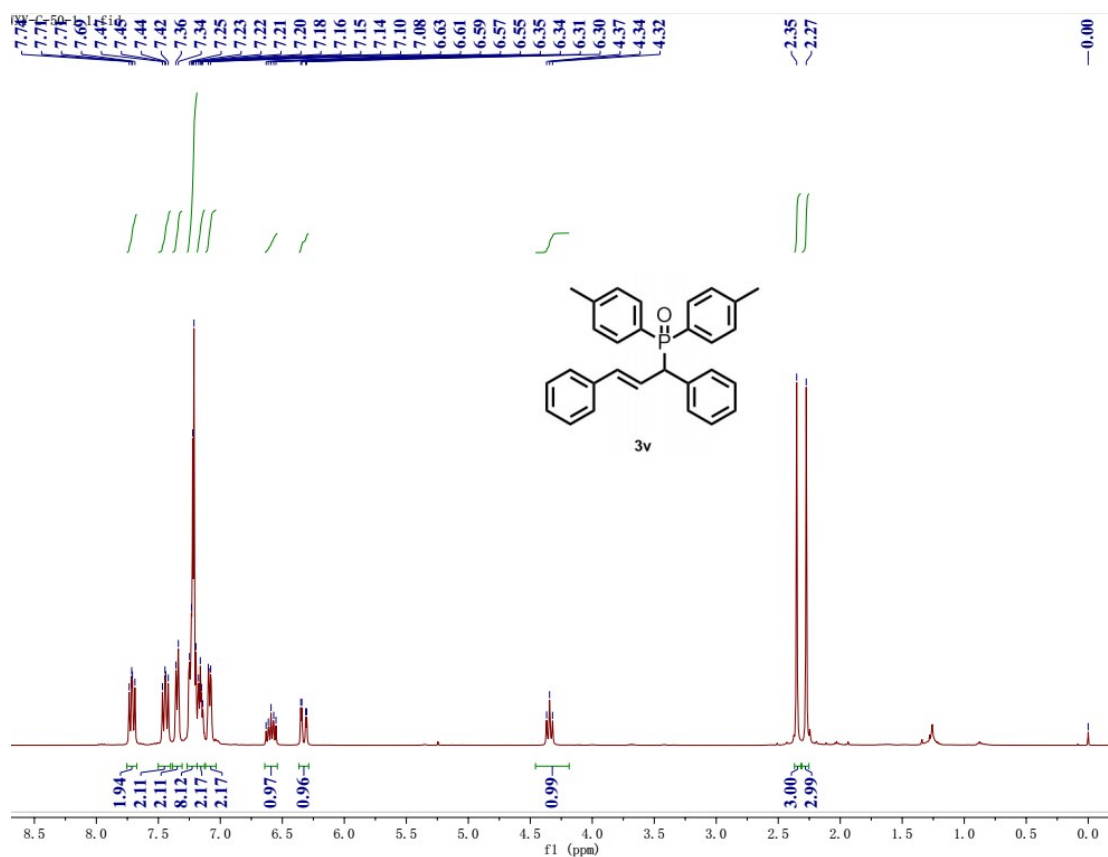

**<sup>1</sup>H NMR (400 MHz, Chloroform-d) spectra for compound **3v**.**

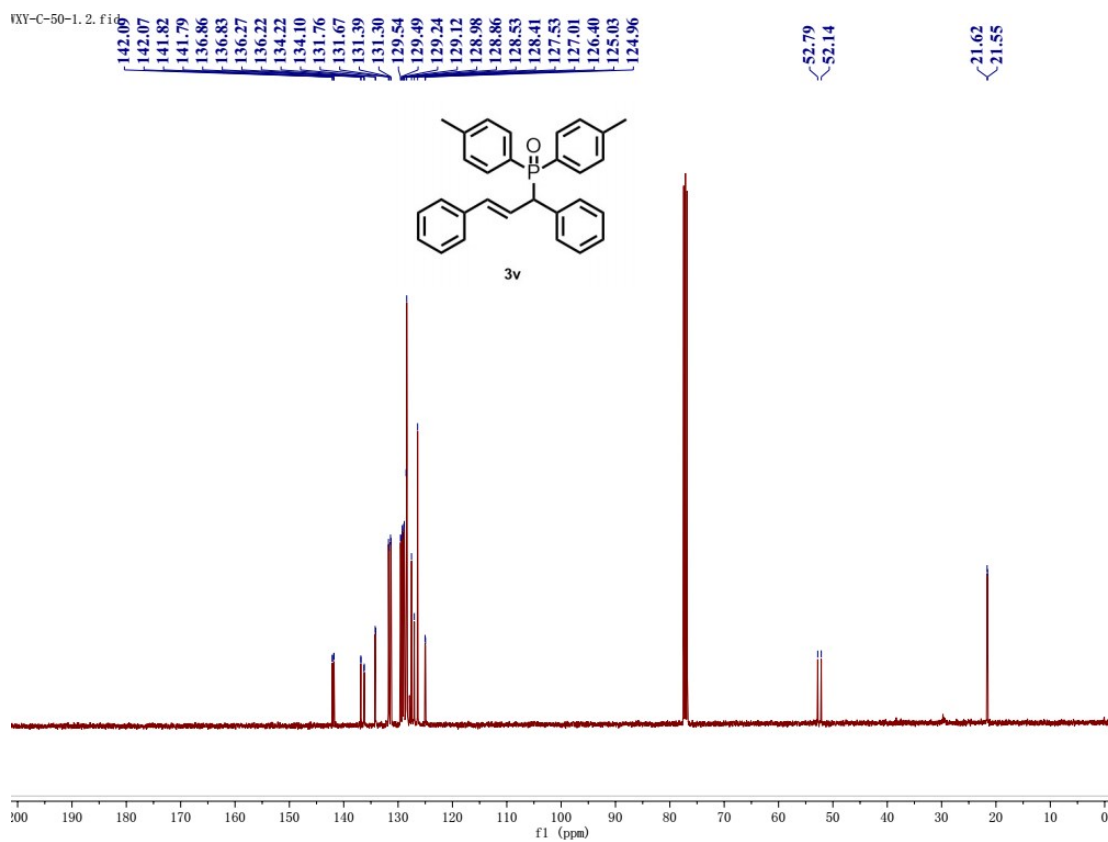

**<sup>13</sup>C NMR (101 MHz, Chloroform-d) spectra for compound **3v**.**

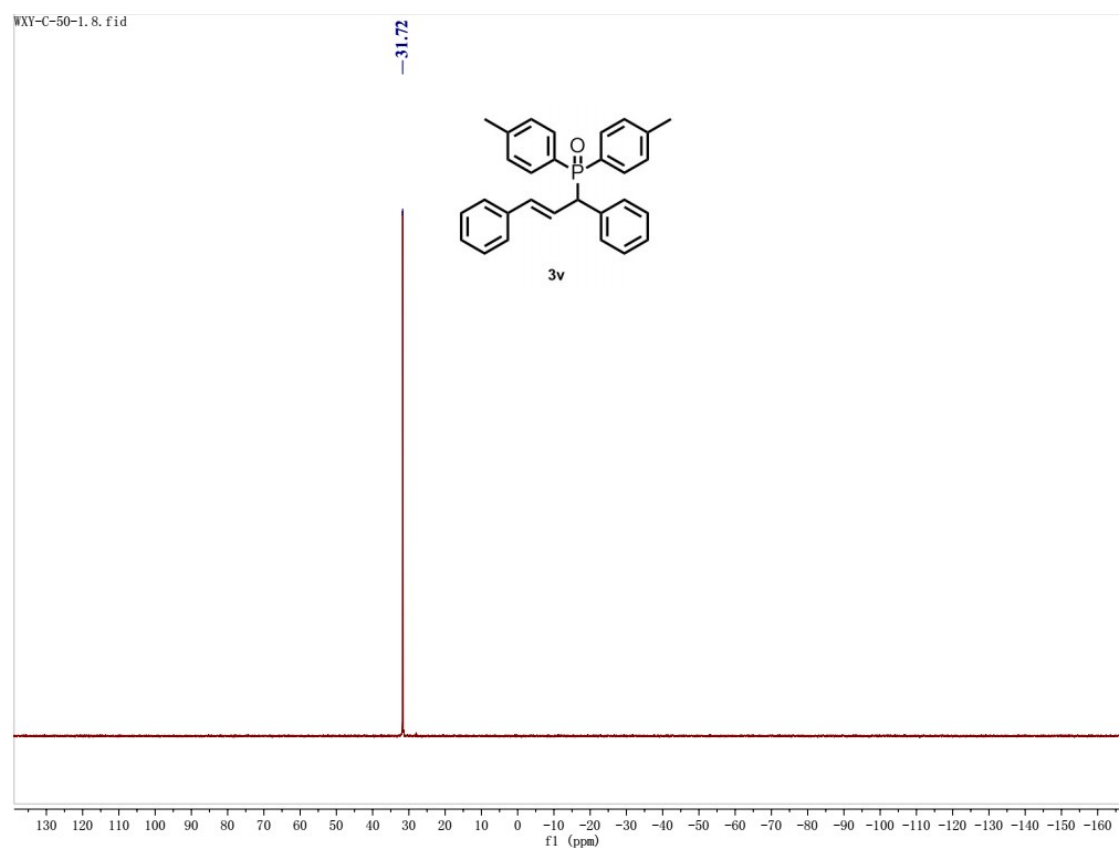

<sup>31</sup>P NMR (162 MHz, Chloroform-d) spectra for compound **3v**.

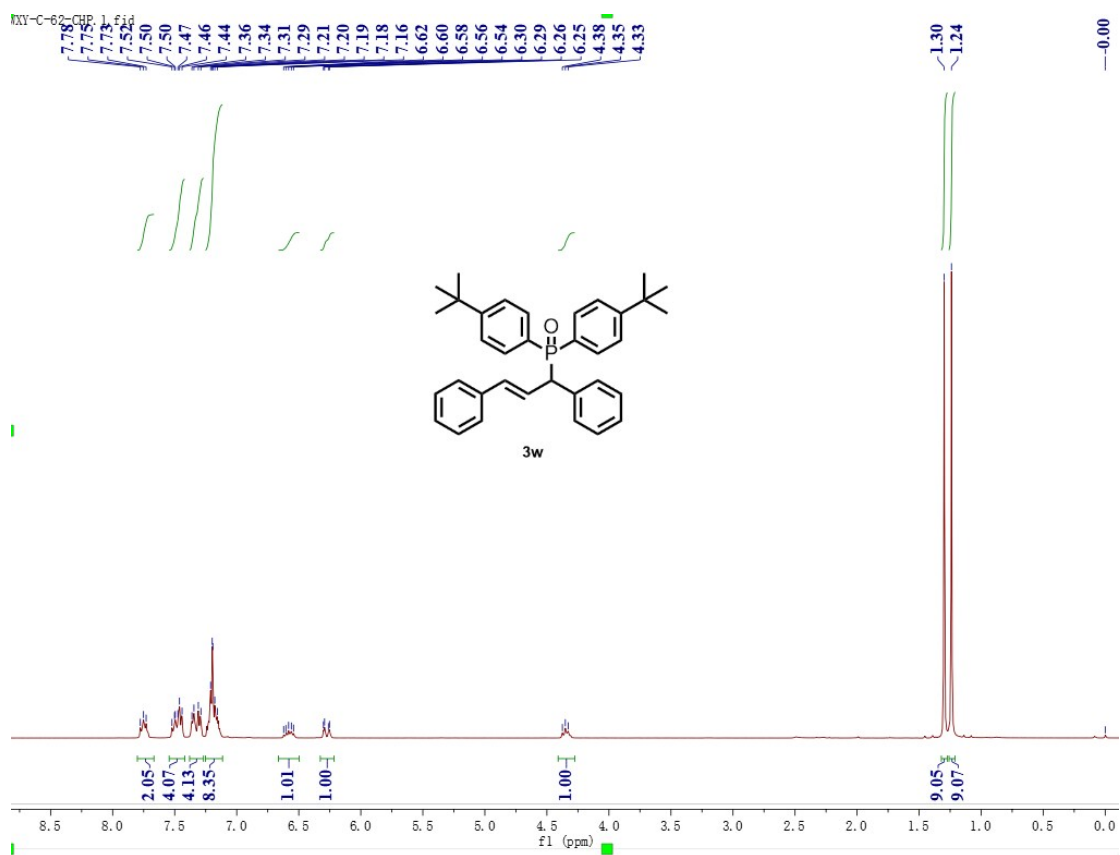

<sup>1</sup>H NMR (400 MHz, Chloroform-d) spectra for compound **3w**.



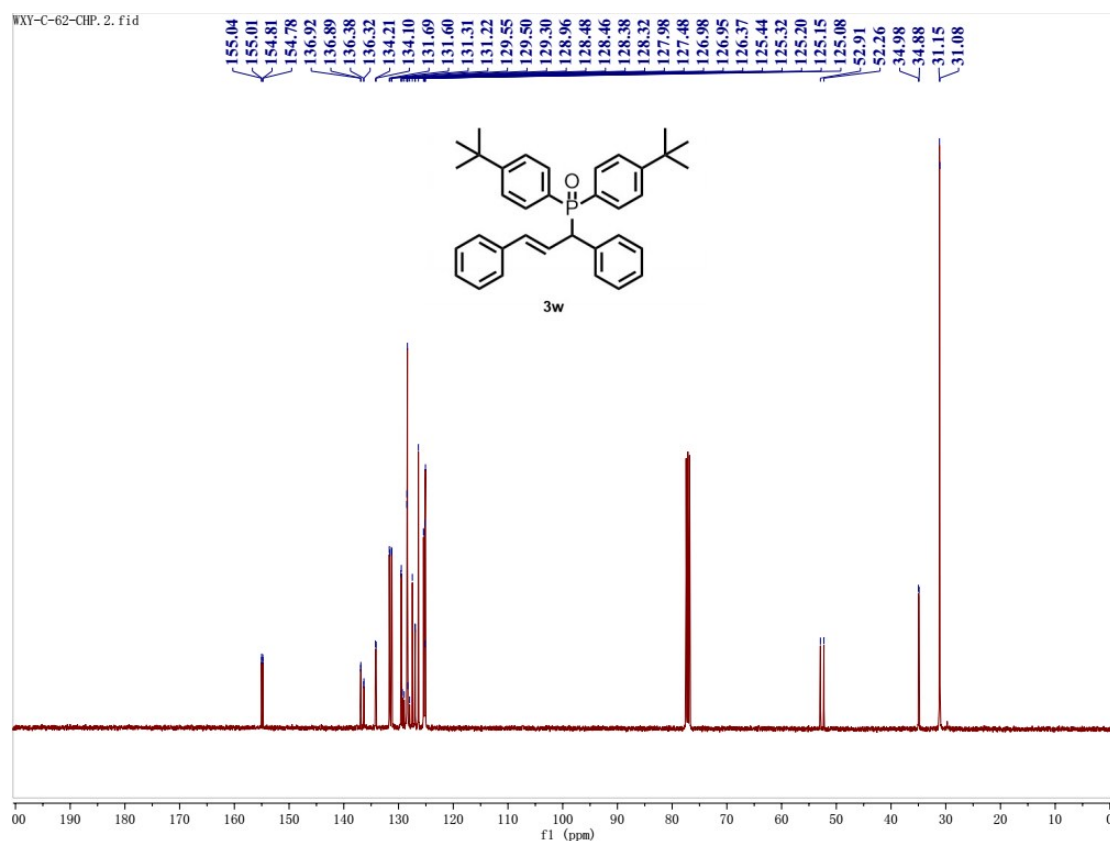

$^{13}\text{C}$  NMR (101 MHz, Chloroform-d) spectra for compound **3w**.

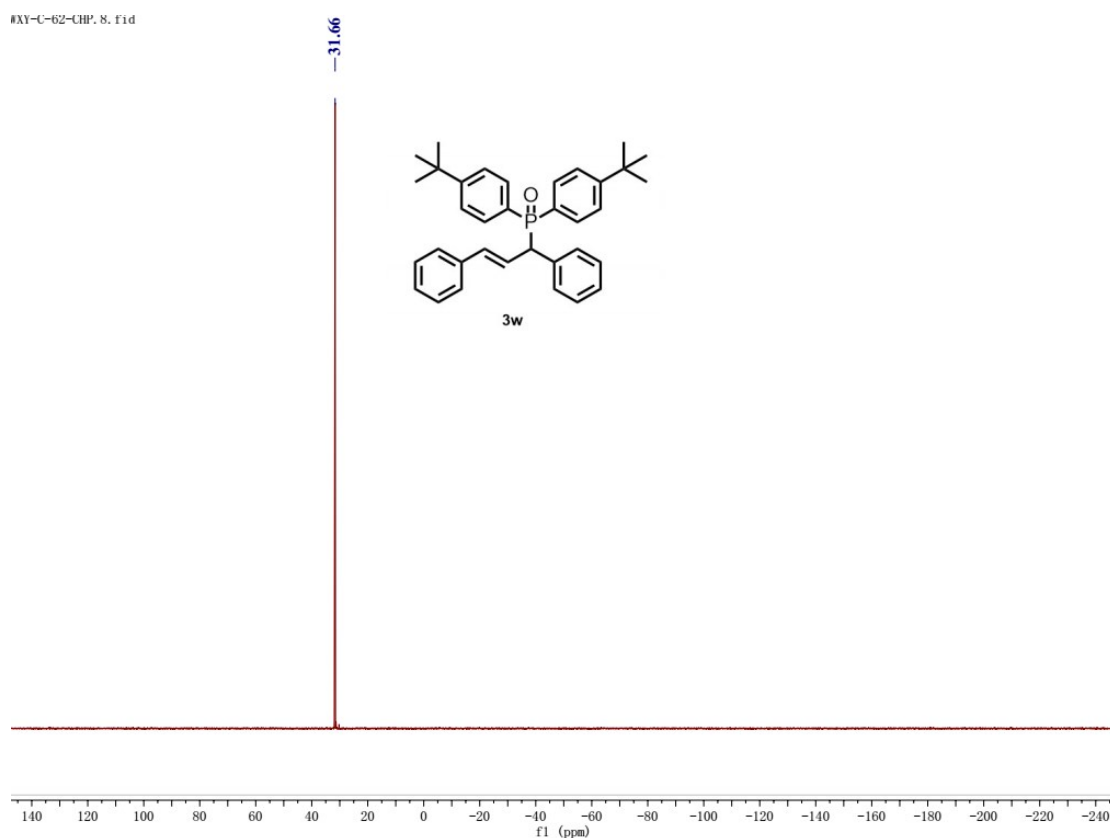

$^{31}\text{P}$  NMR (162 MHz, Chloroform-d) spectra for compound **3w**.

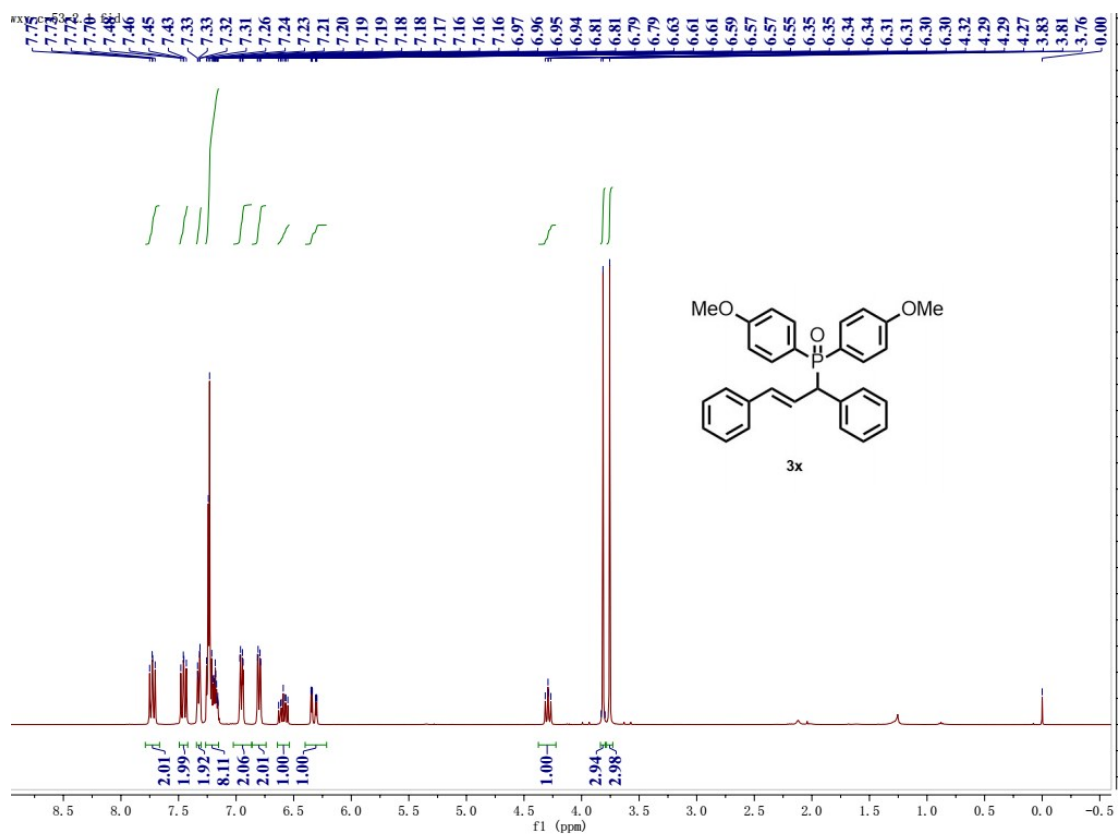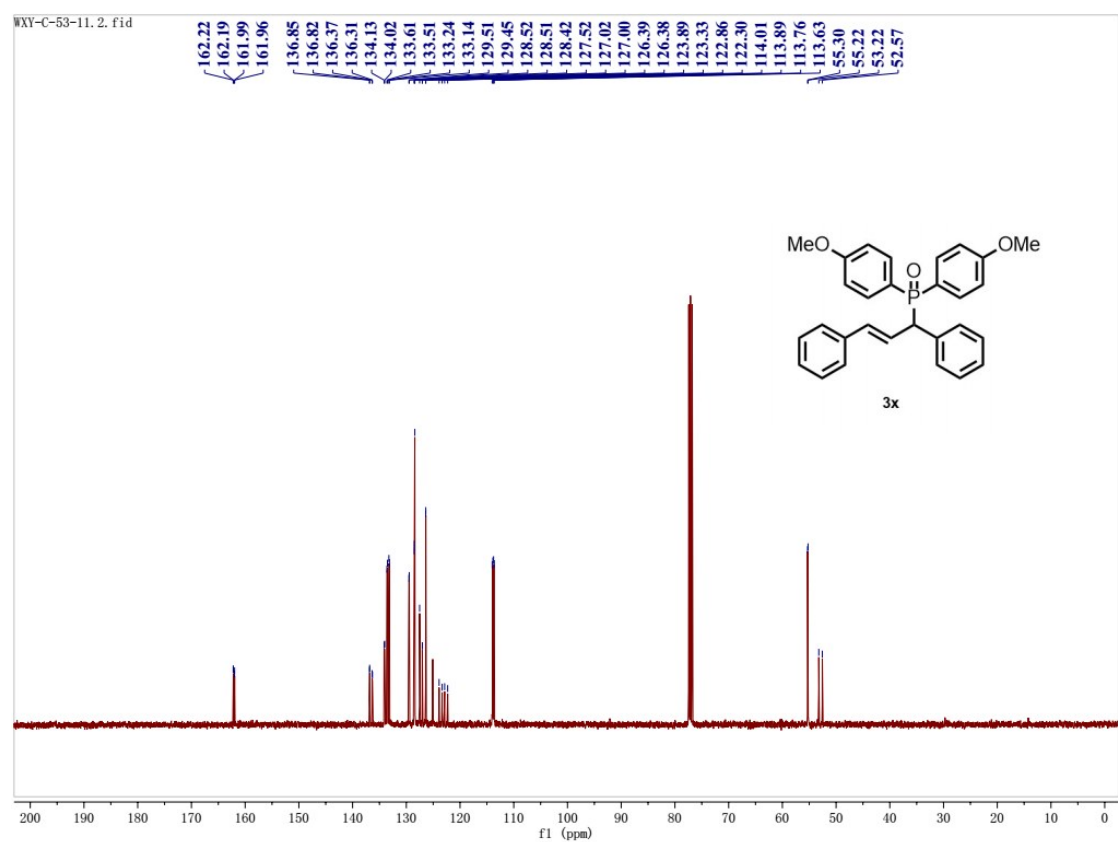

xy-c-53-2.8.fid

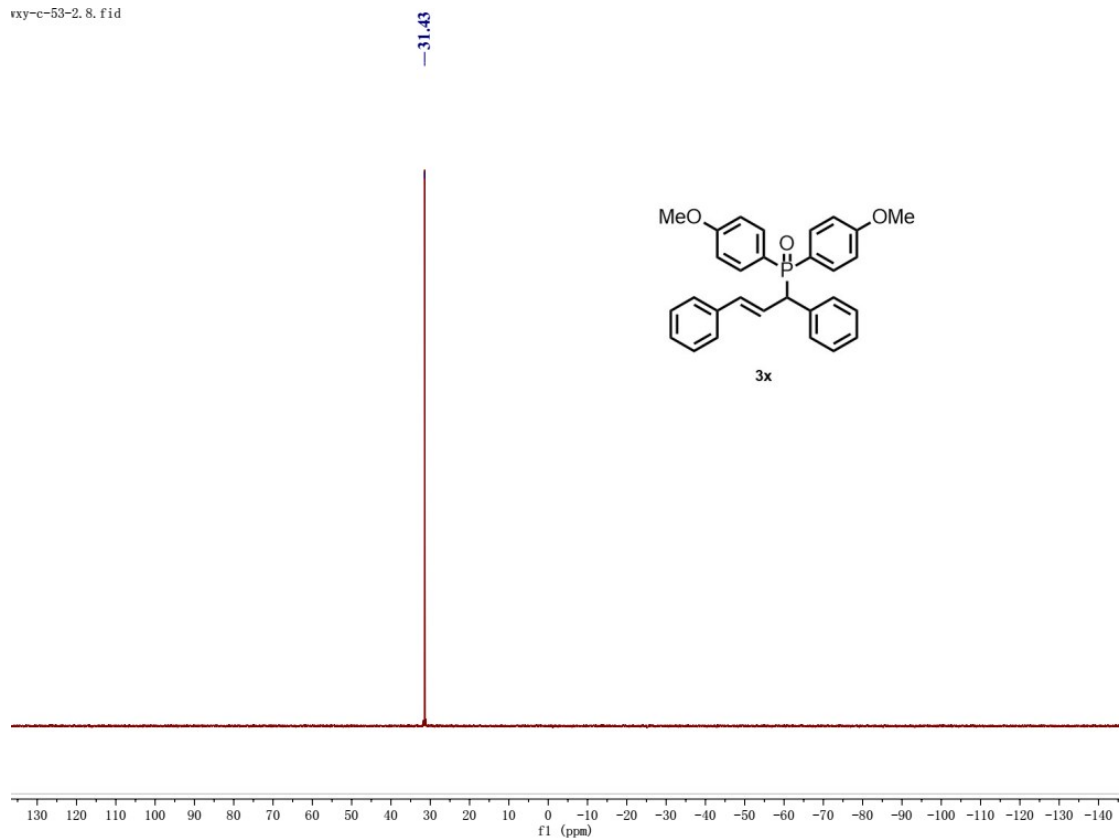

<sup>31</sup>P NMR (162 MHz, Chloroform-d) spectra for compound **3x**.

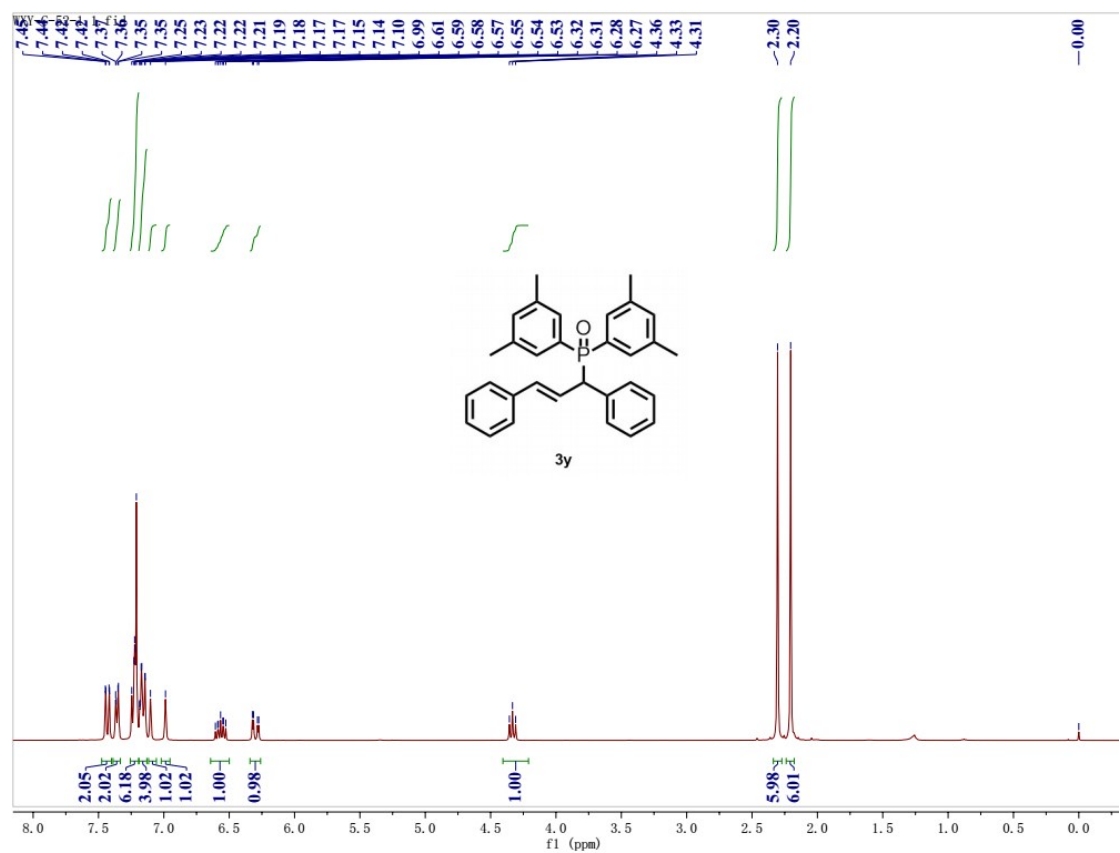

<sup>1</sup>H NMR (400 MHz, Chloroform-d) spectra for compound **3y**.

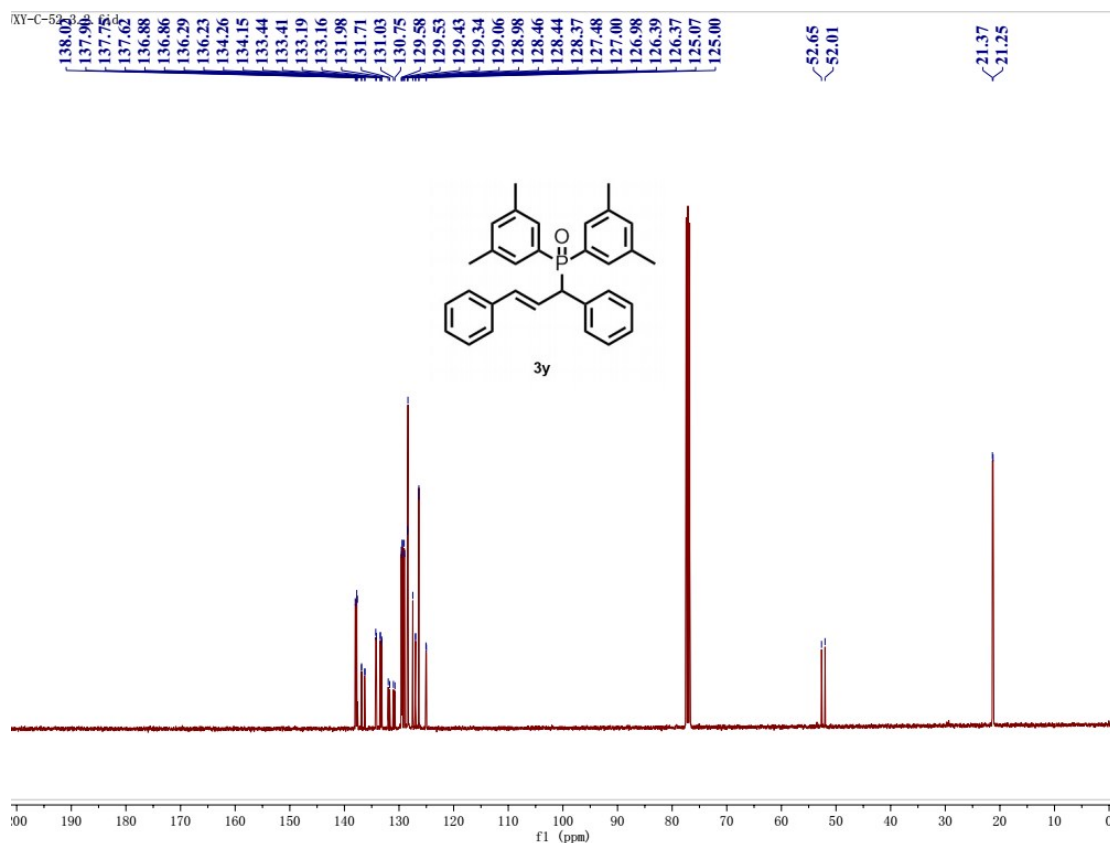

<sup>13</sup>C NMR (101 MHz, Chloroform-d) spectra for compound **3y**.

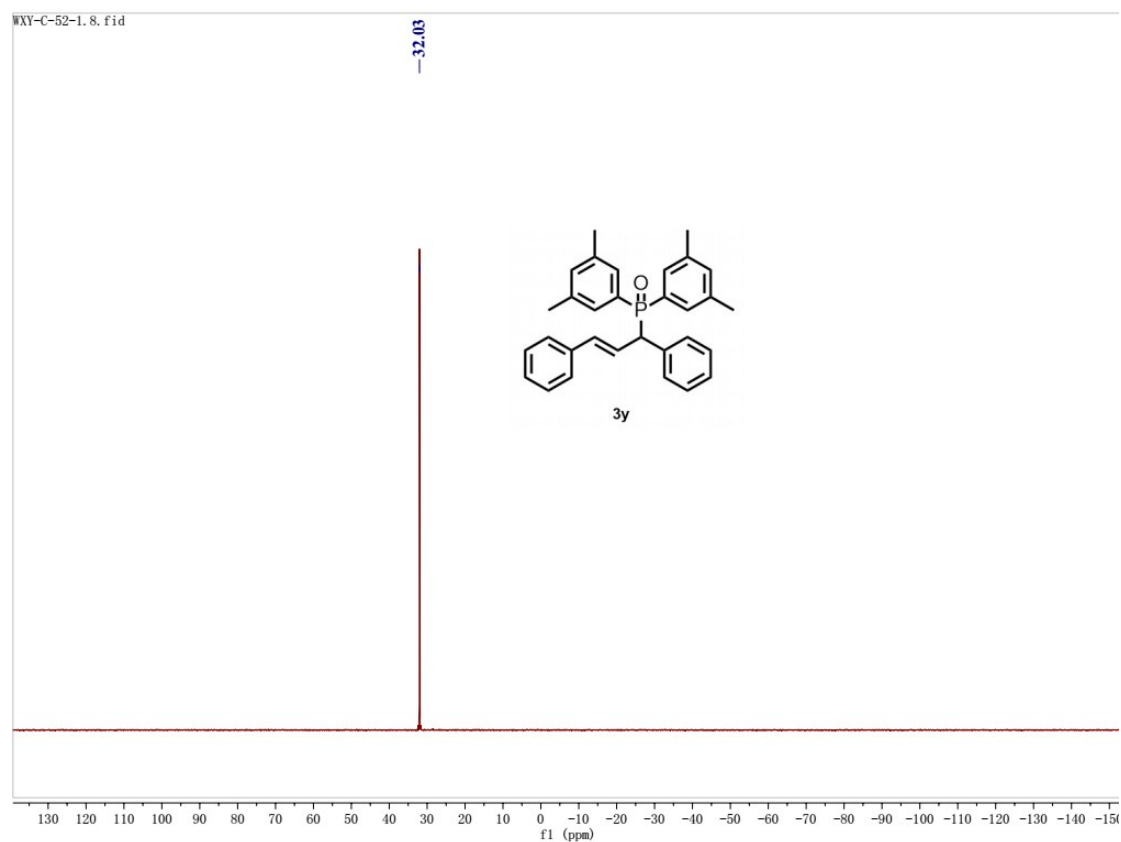

<sup>31</sup>P NMR (162 MHz, Chloroform-d) spectra for compound **3y**.

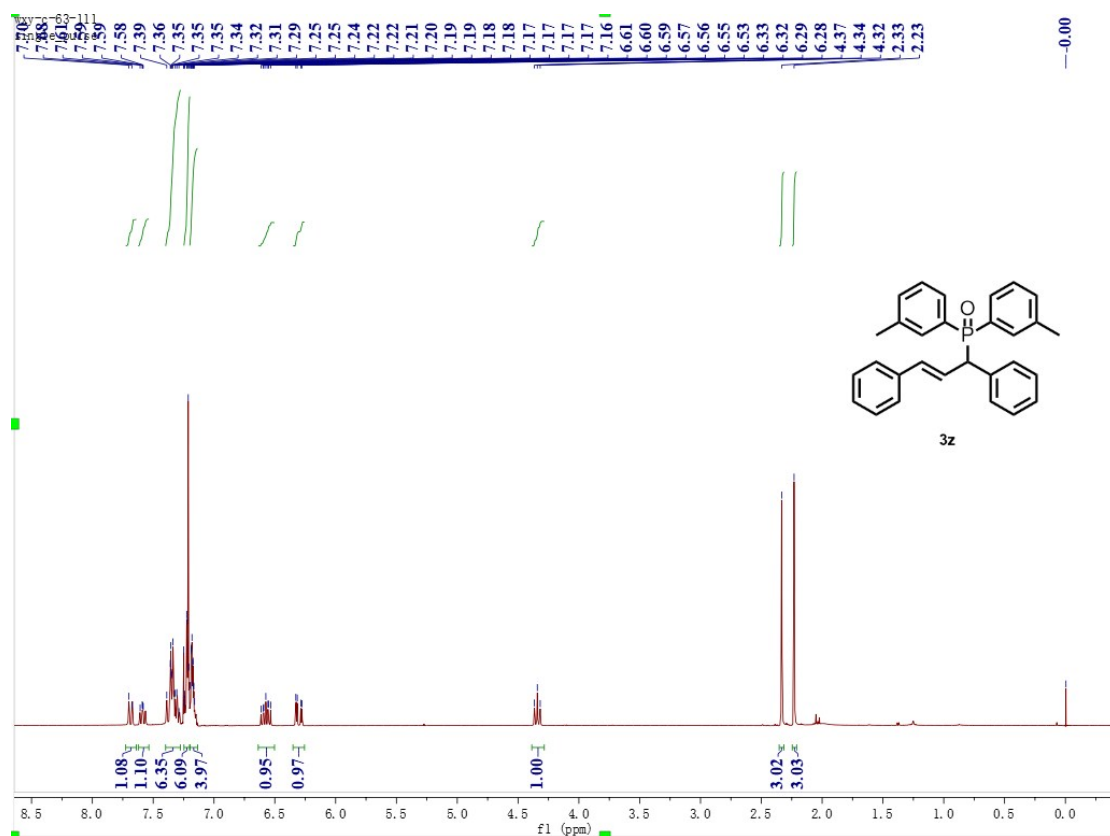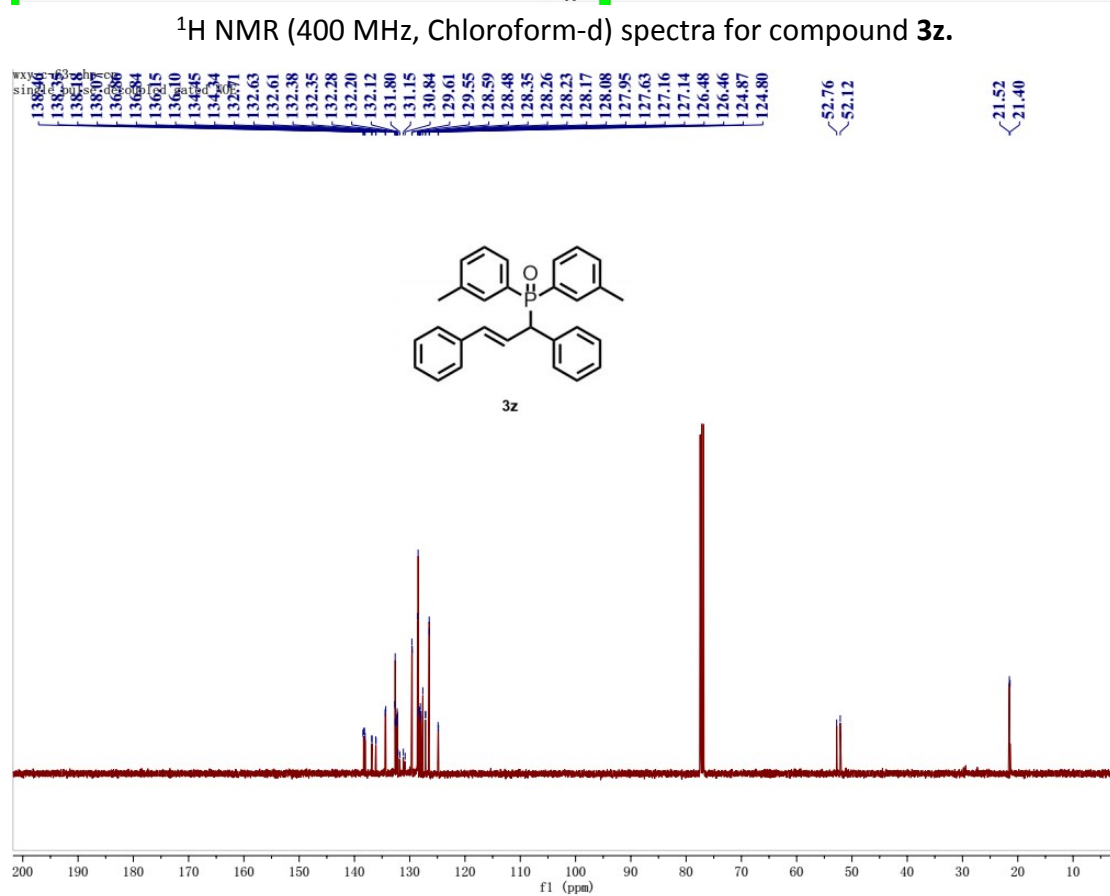

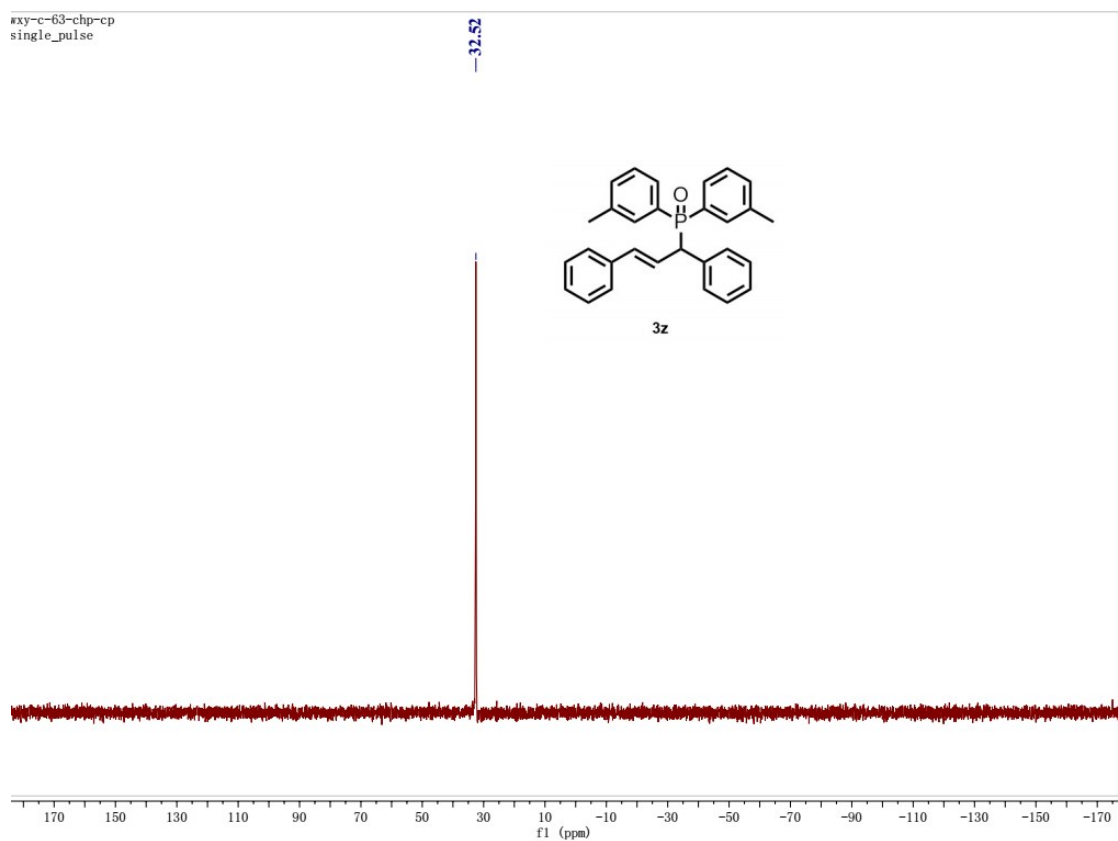

<sup>31</sup>P NMR (162 MHz, Chloroform-d) spectra for compound **3z**.

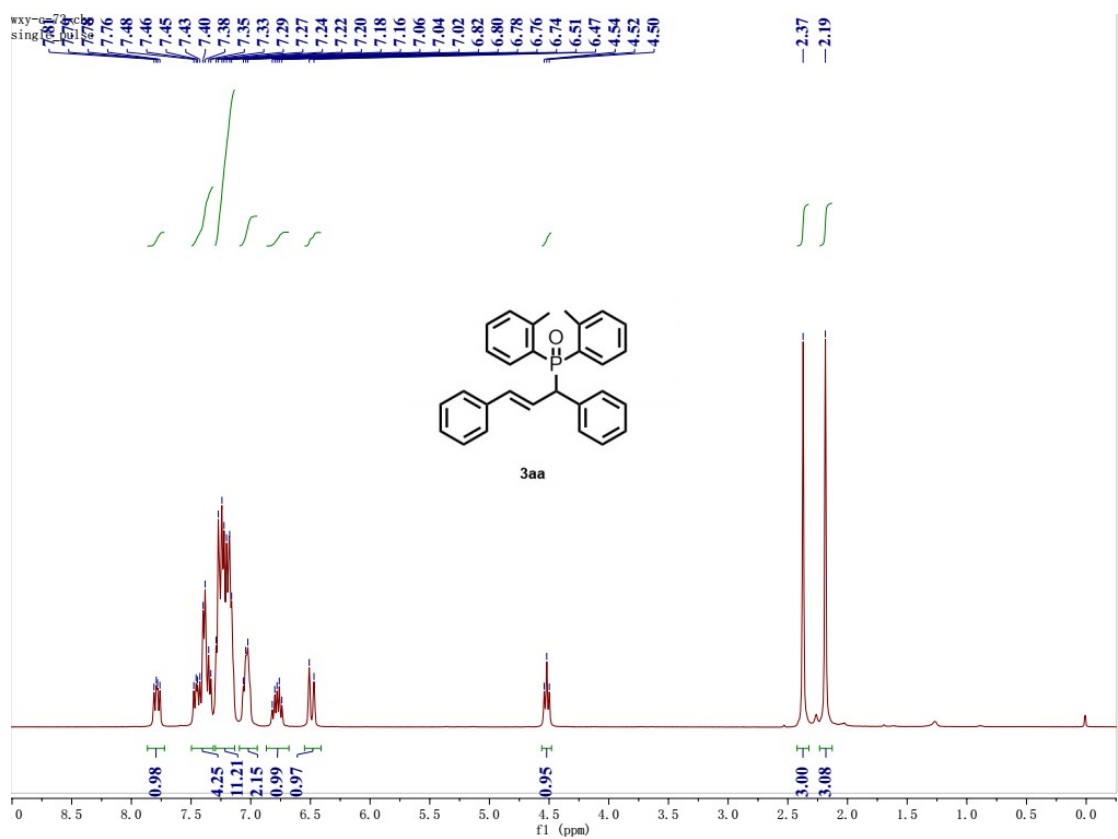

<sup>1</sup>H NMR (400 MHz, Chloroform-d) spectra for compound **3aa**.

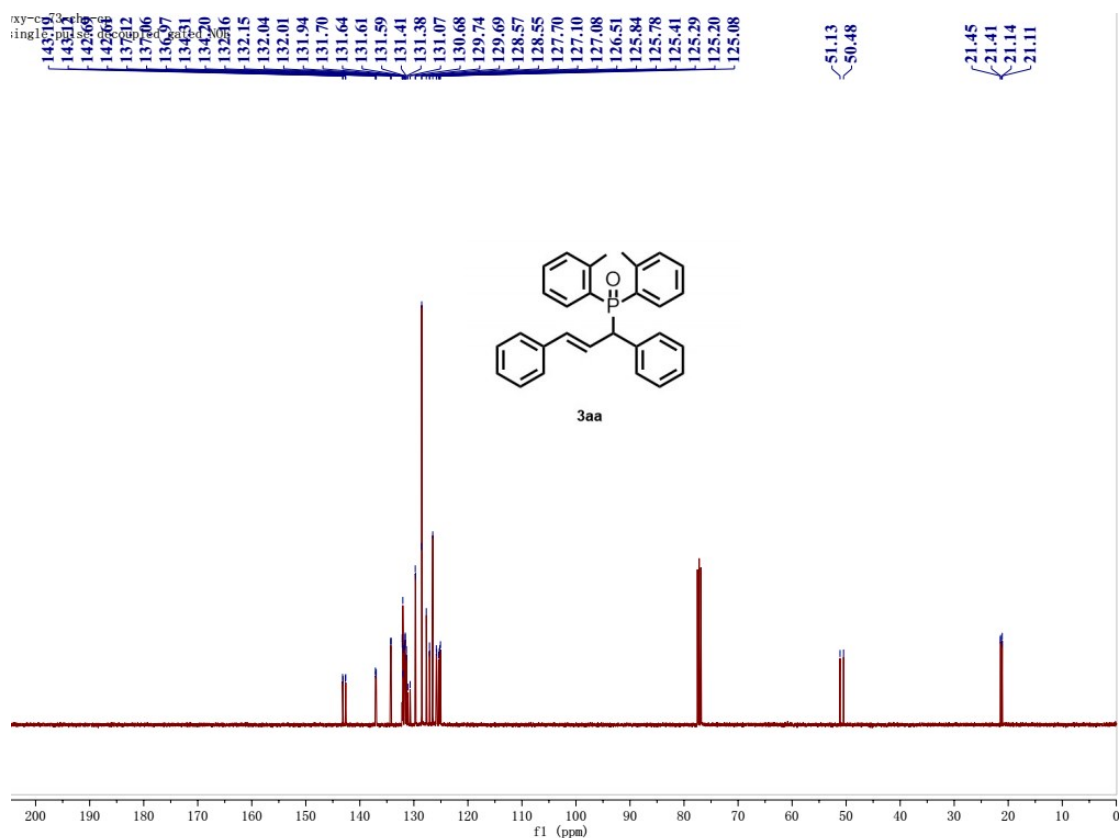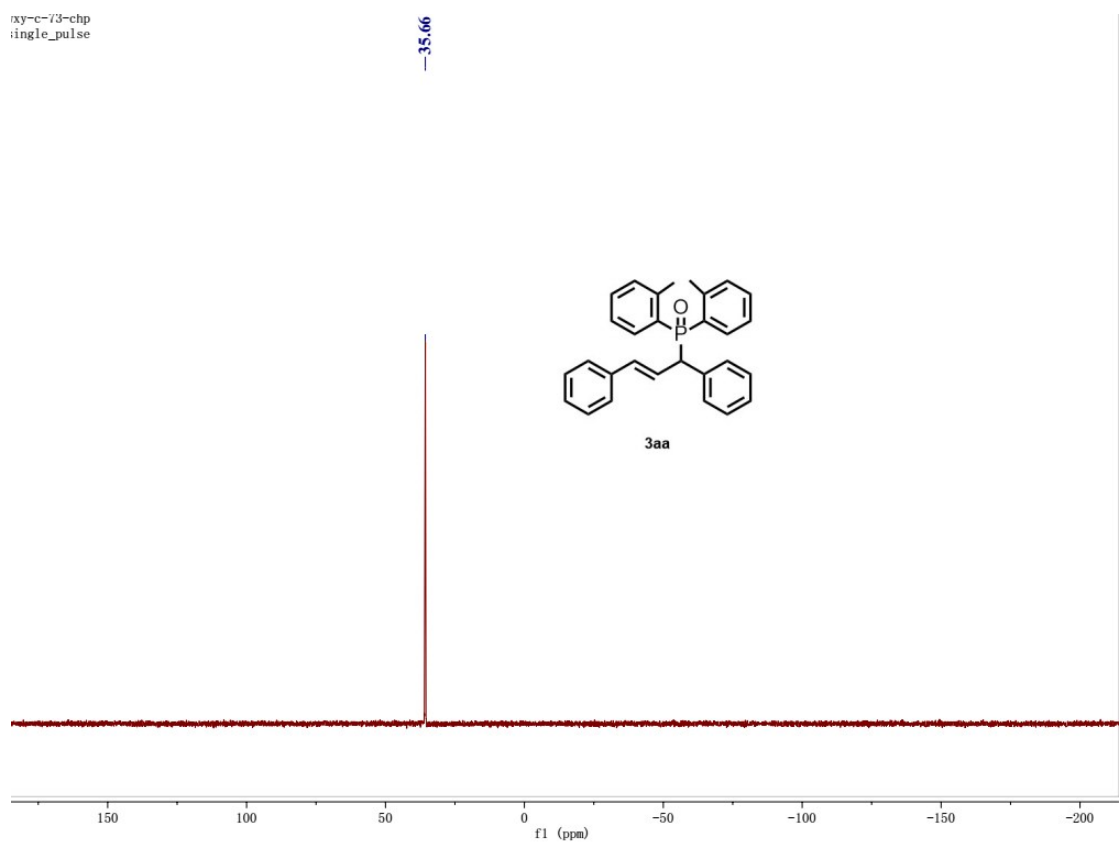

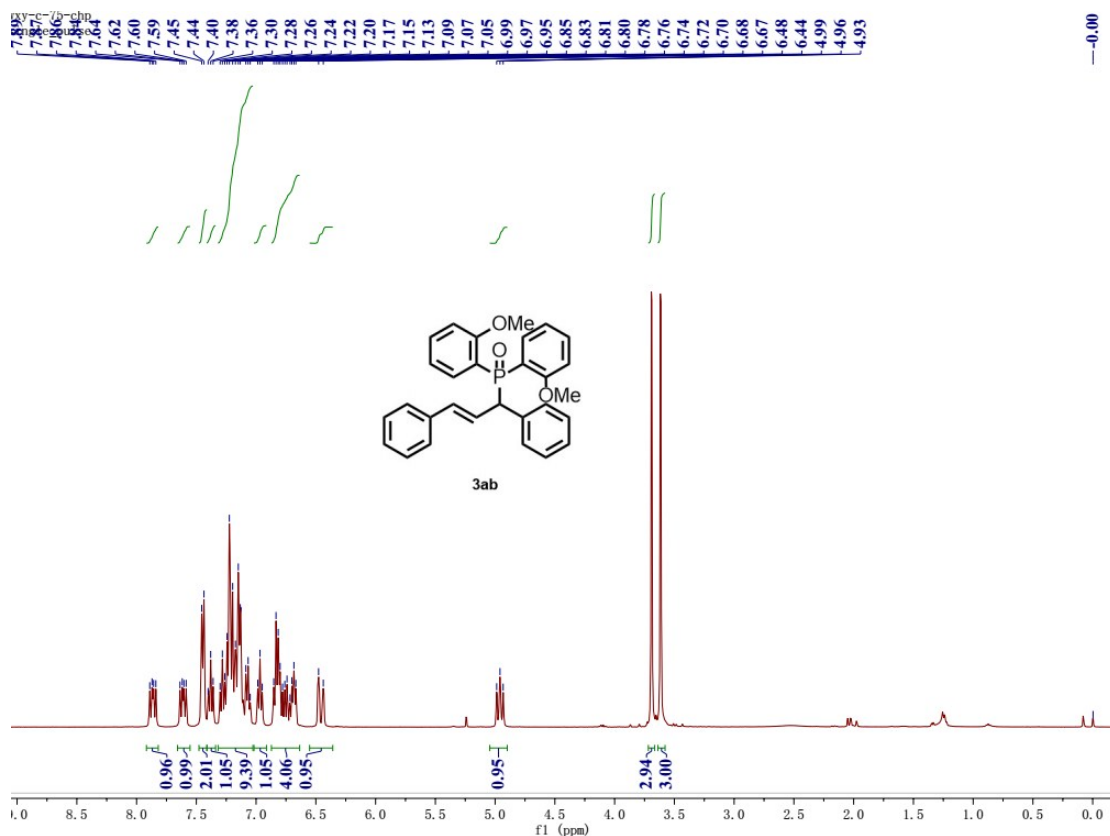

**<sup>1</sup>H NMR (400 MHz, Chloroform-d) spectra for compound 3ab.**

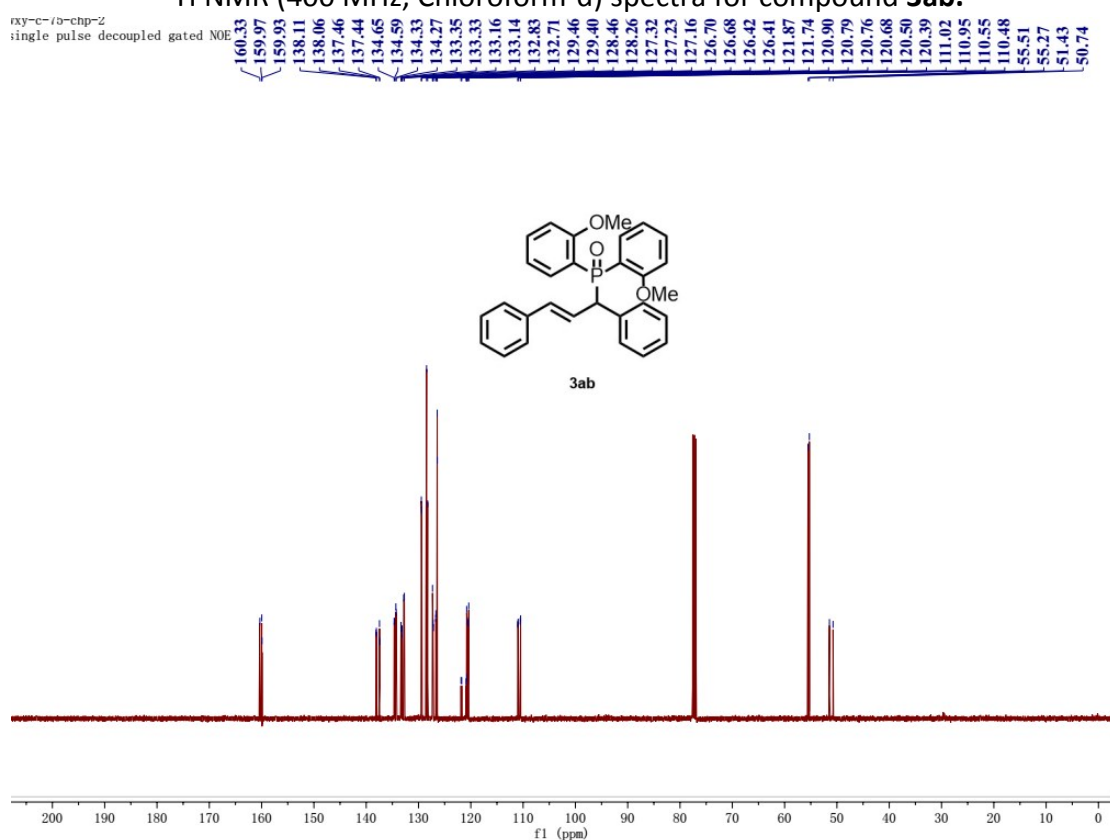

**<sup>13</sup>C NMR (101 MHz, Chloroform-d) spectra for compound 3ab.**



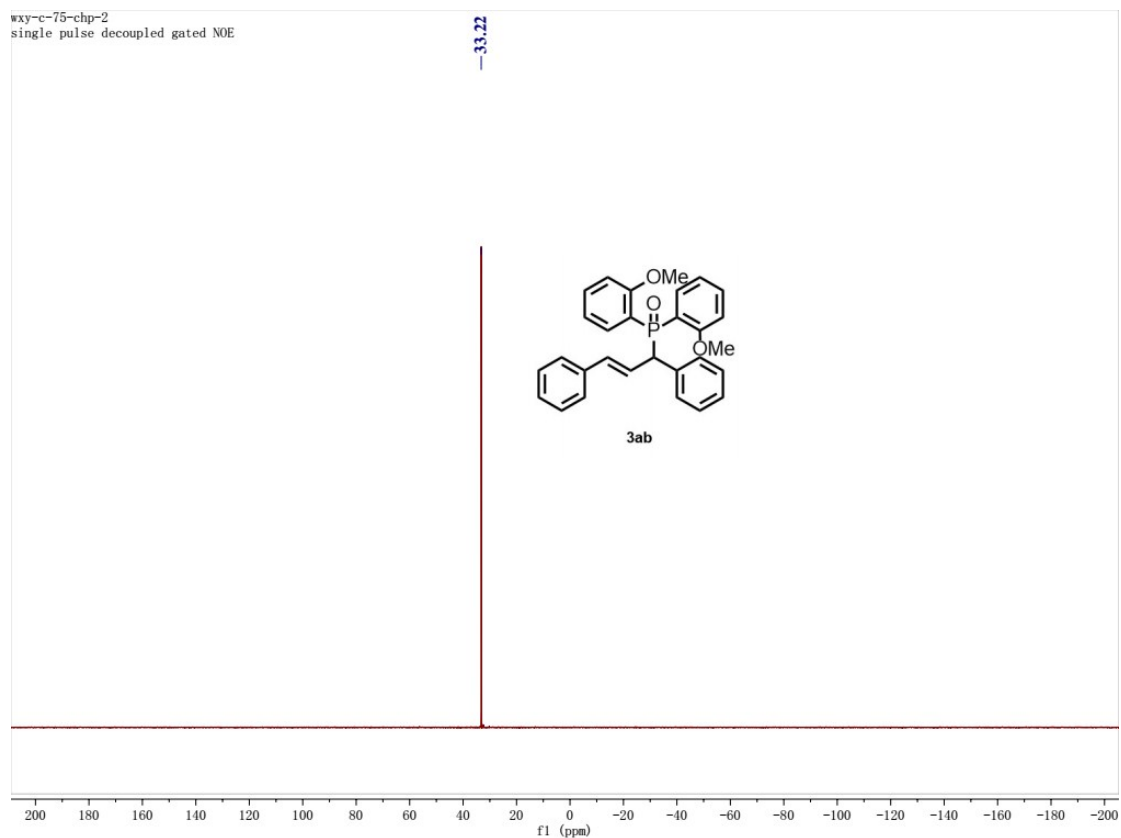

$^{31}\text{P}$  NMR (162 MHz, Chloroform- $d$ ) spectra for compound **3ab**.

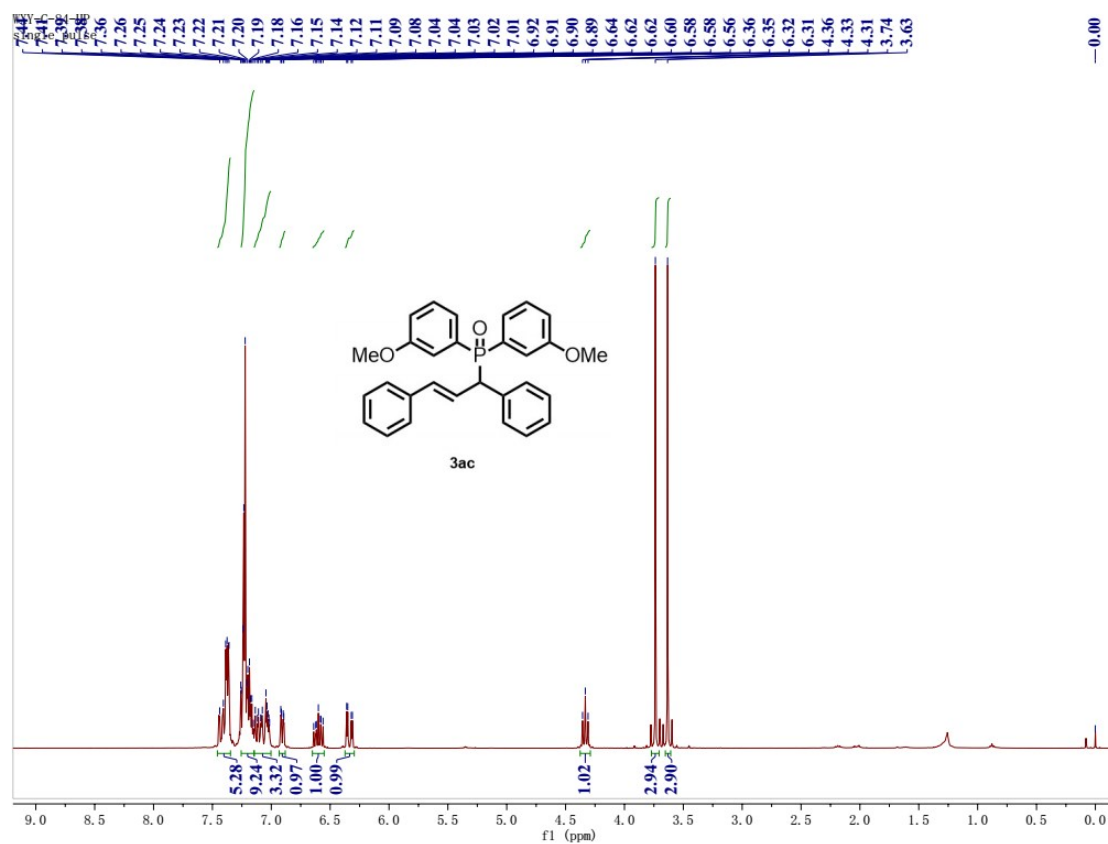

$^1\text{H}$  NMR (400 MHz, Chloroform- $d$ ) spectra for compound **3ac**.

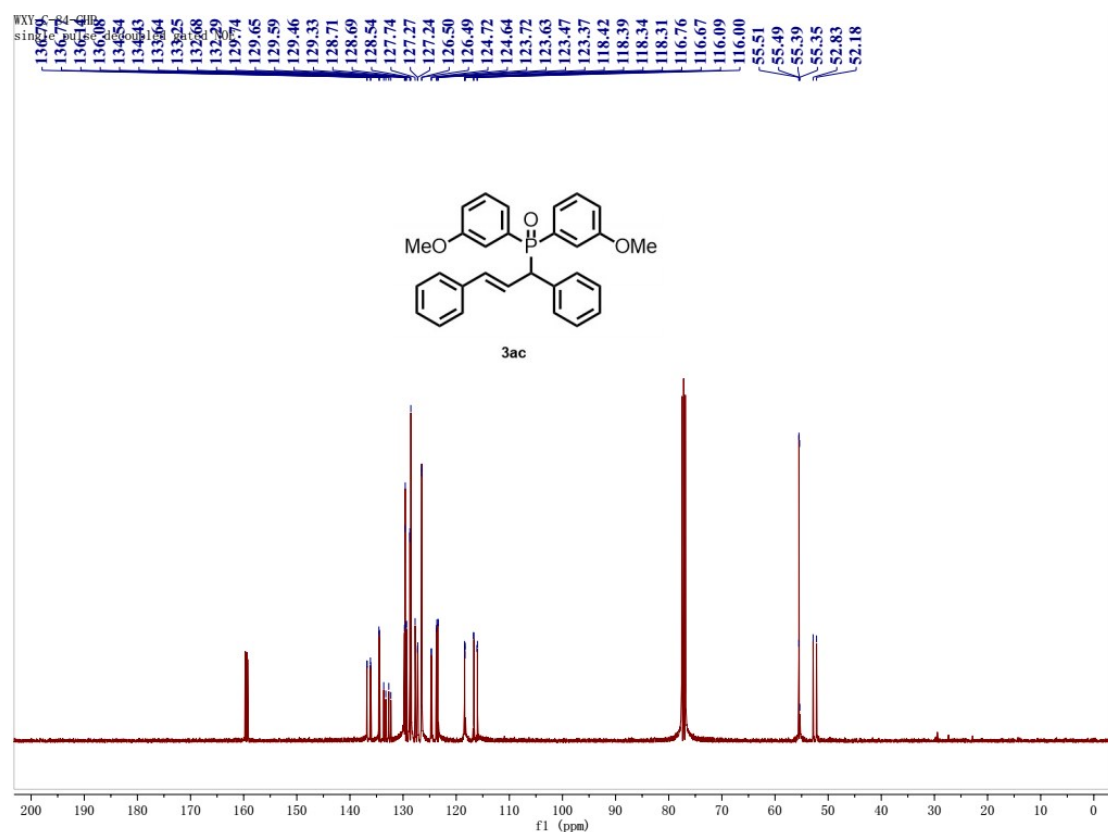

<sup>13</sup>C NMR (101 MHz, Chloroform-d) spectra for compound **3ac**.

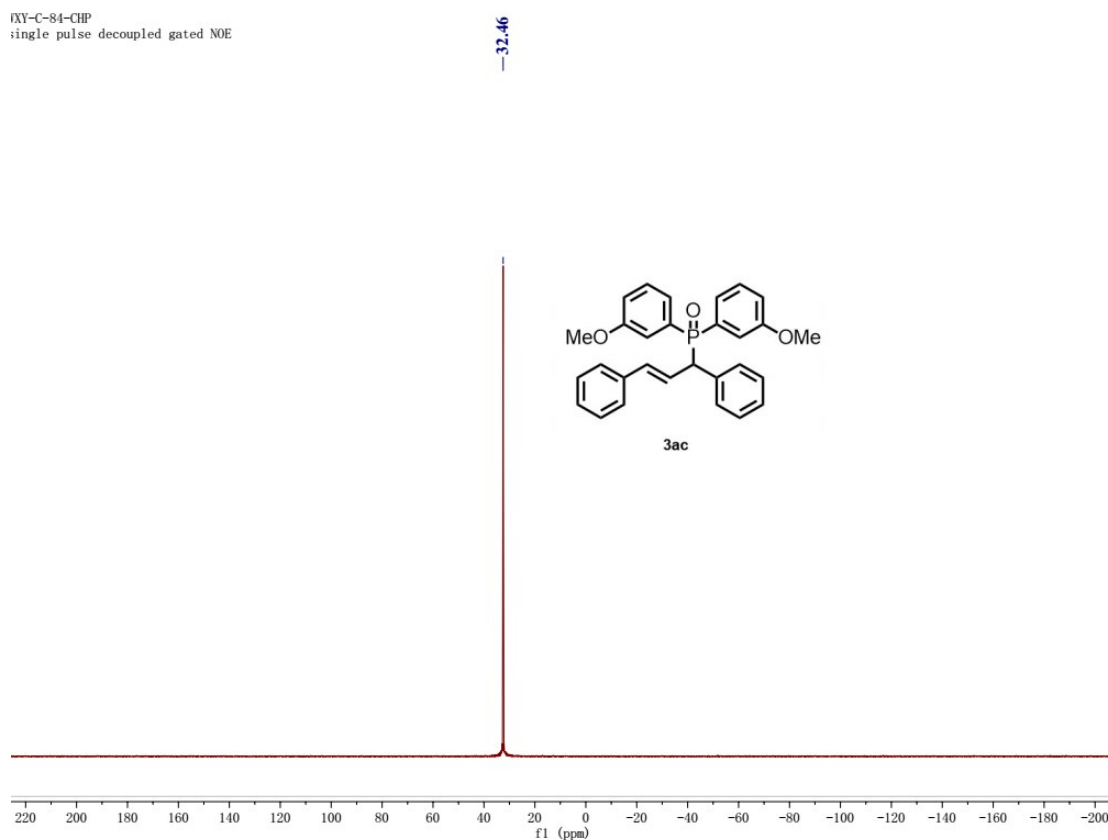

<sup>31</sup>P NMR (162 MHz, Chloroform-d) spectra for compound **3ac**.

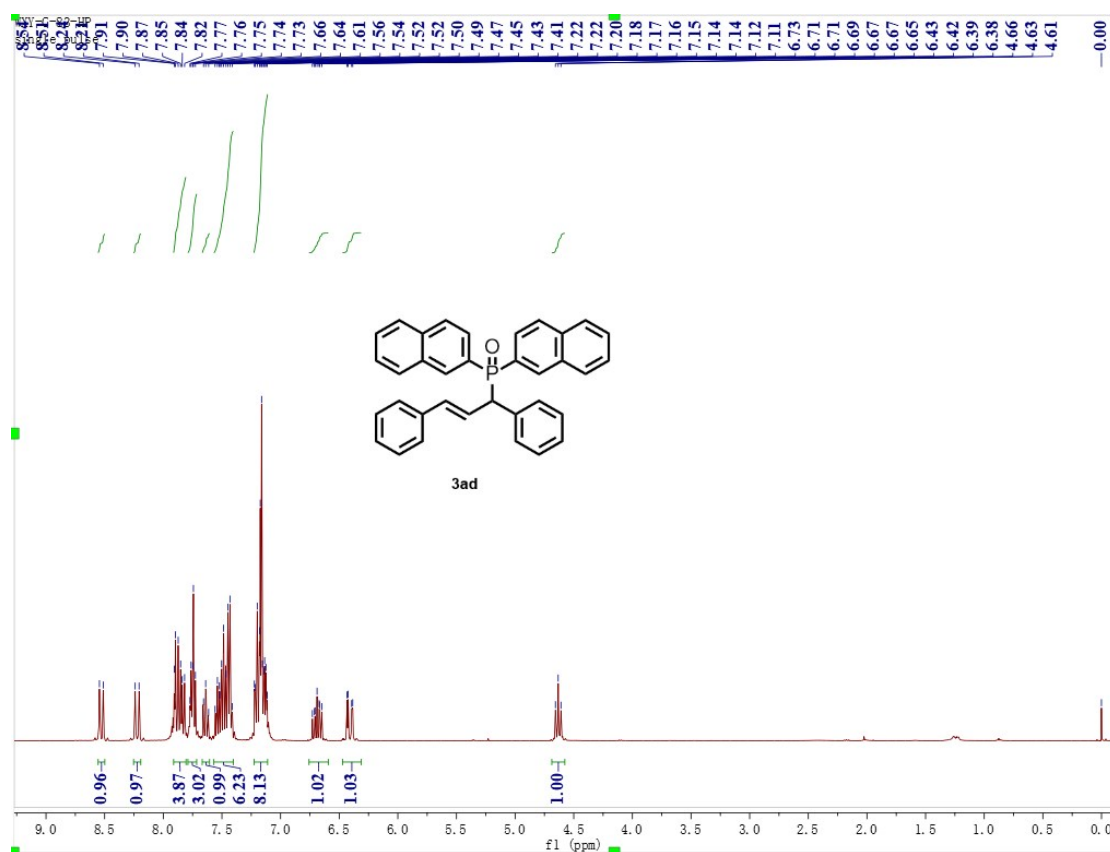

**<sup>1</sup>H NMR (400 MHz, Chloroform-d) spectra for compound **3ad**.**

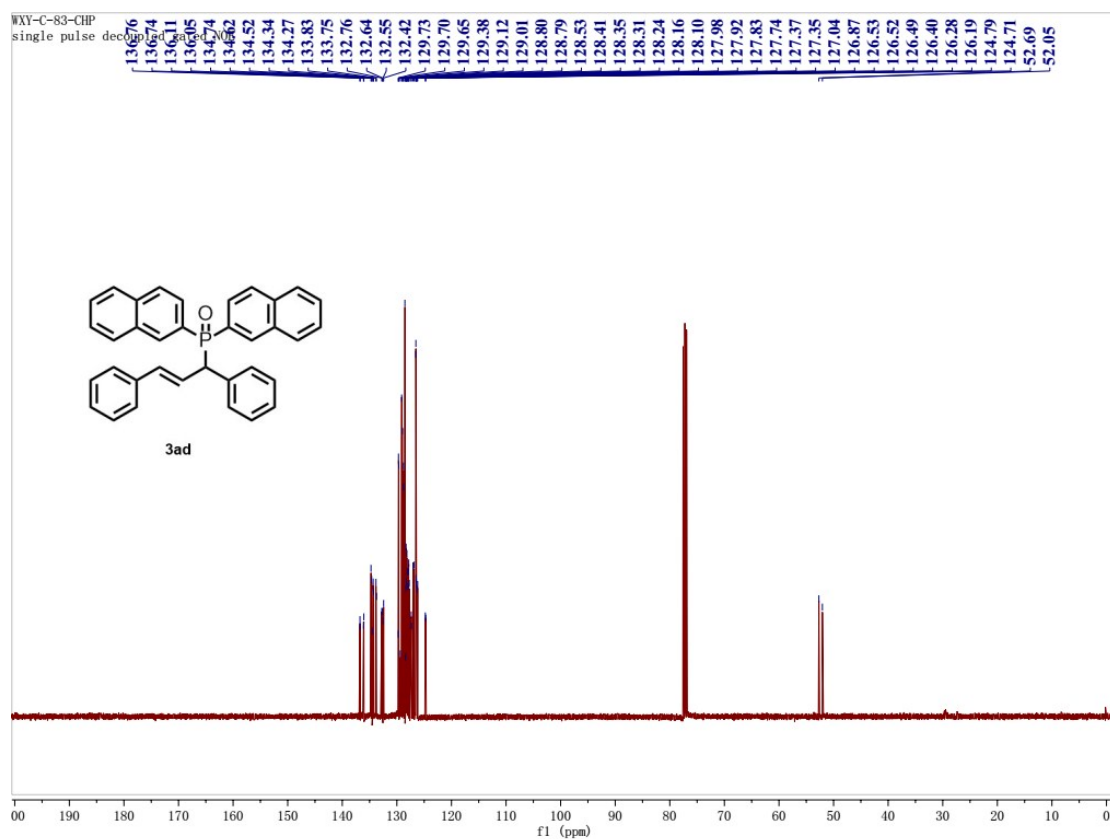

**<sup>13</sup>C NMR (101 MHz, Chloroform-d) spectra for compound **3ad**.**

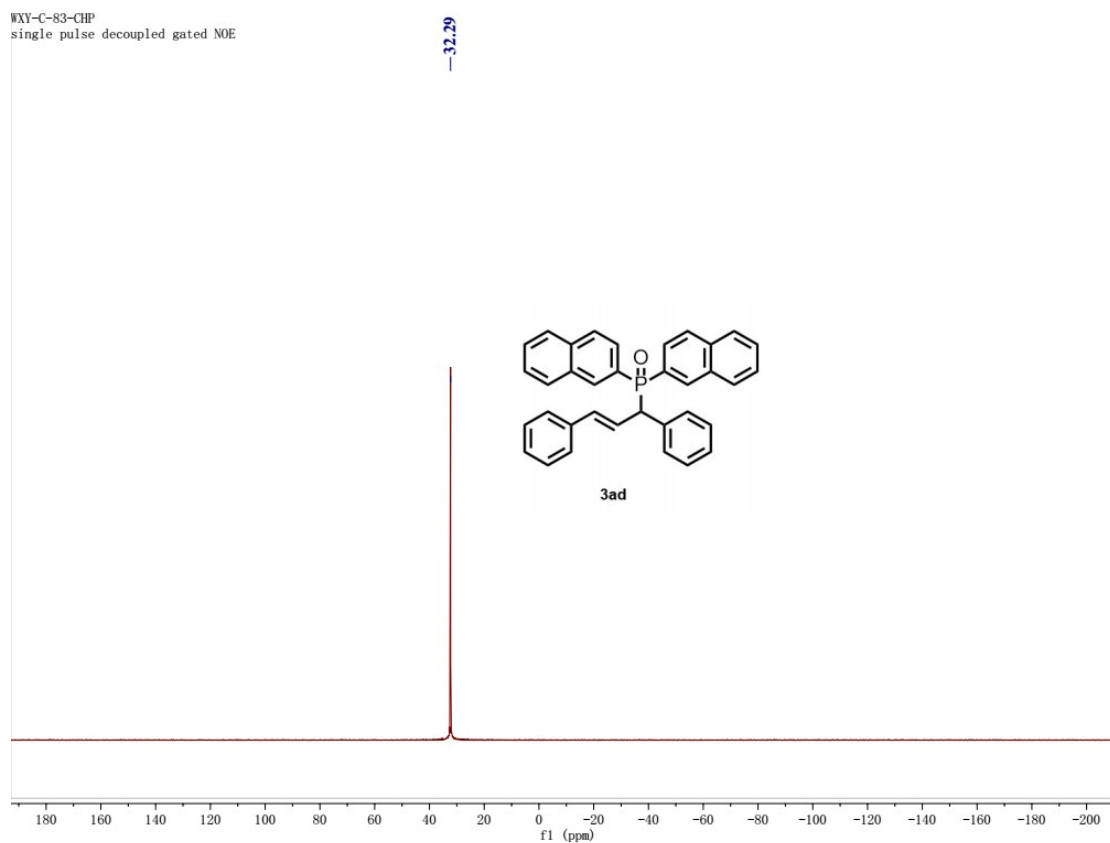

<sup>31</sup>P NMR (162 MHz, Chloroform-d) spectra for compound **3ad**.

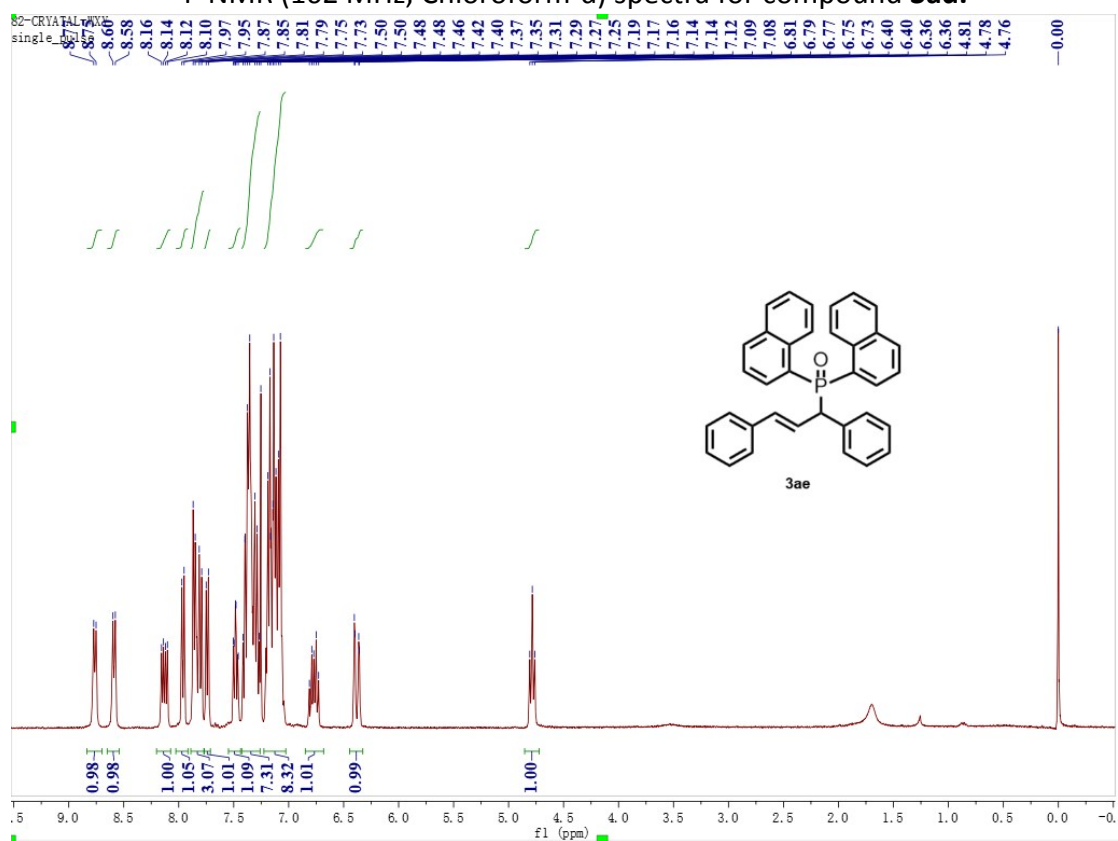

<sup>1</sup>H NMR (400 MHz, Chloroform-d) spectra for compound **3ae**.

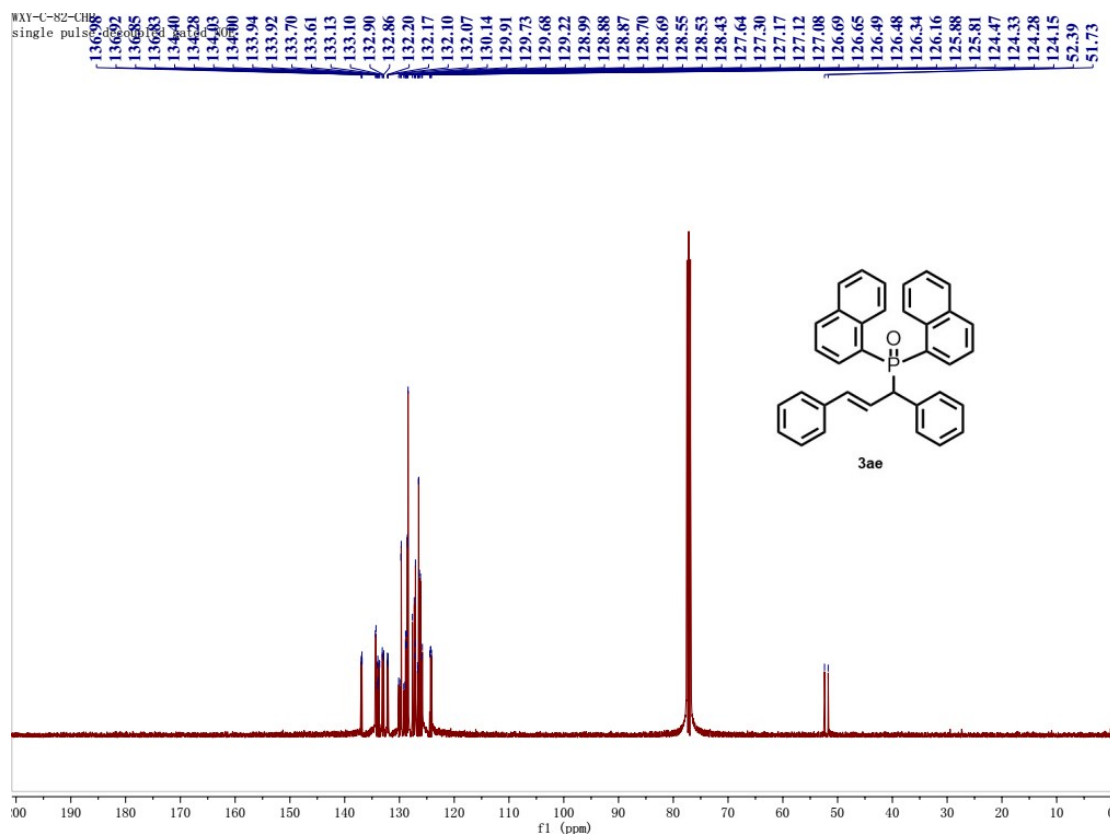

<sup>13</sup>C NMR (101 MHz, Chloroform-d) spectra for compound **3ae**.

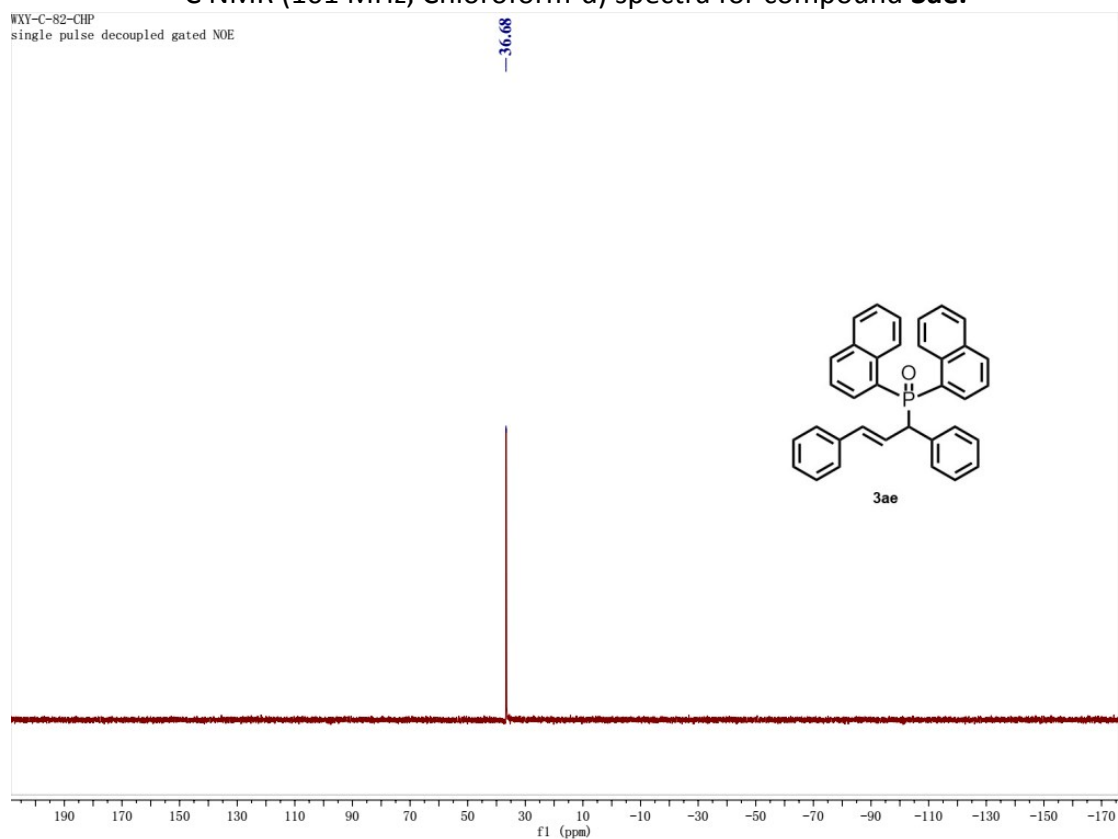

<sup>31</sup>P NMR (162 MHz, Chloroform-d) spectra for compound **3ae**.

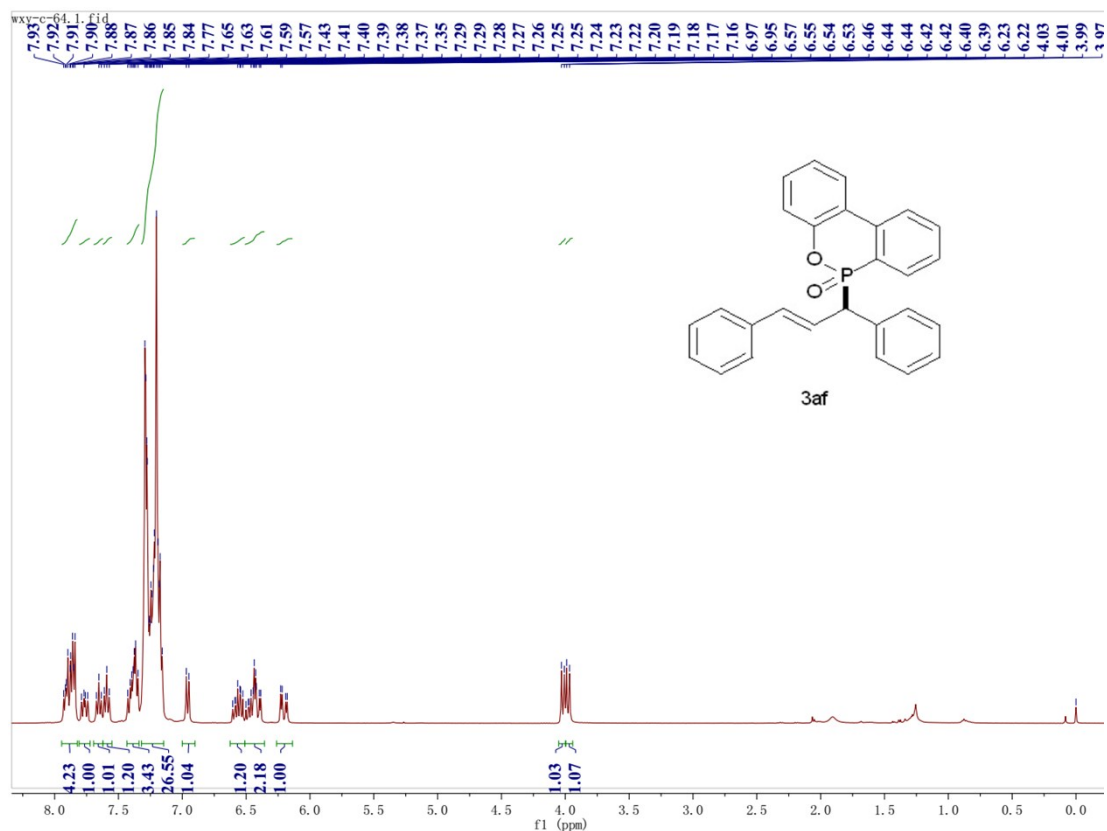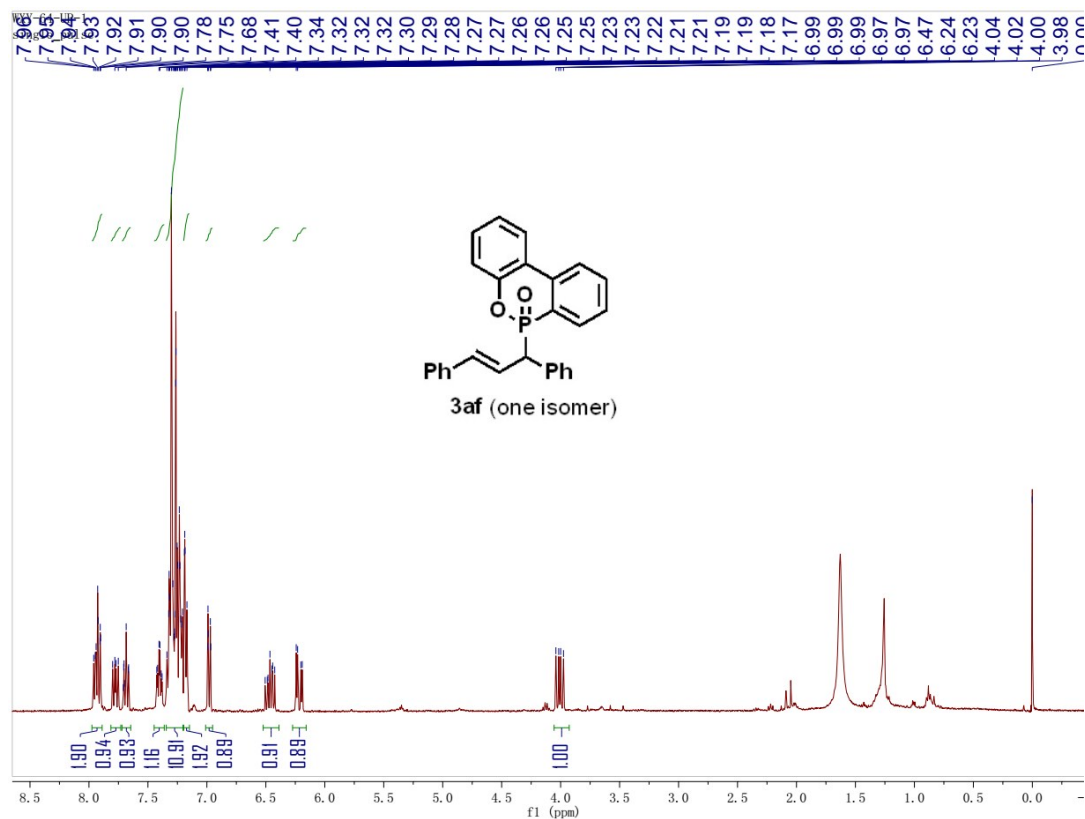

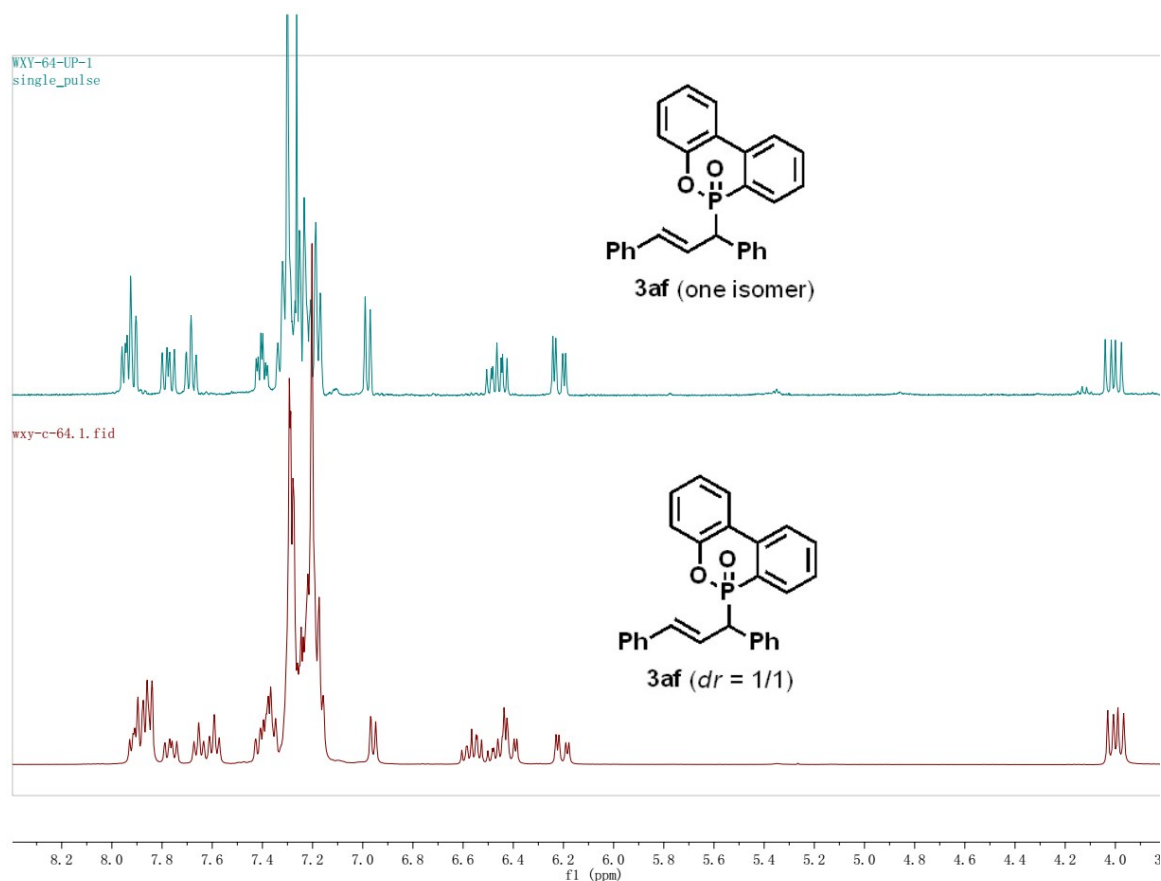

<sup>1</sup>H NMR (400 MHz, Chloroform-d) spectra for compound **3af** (comparison)

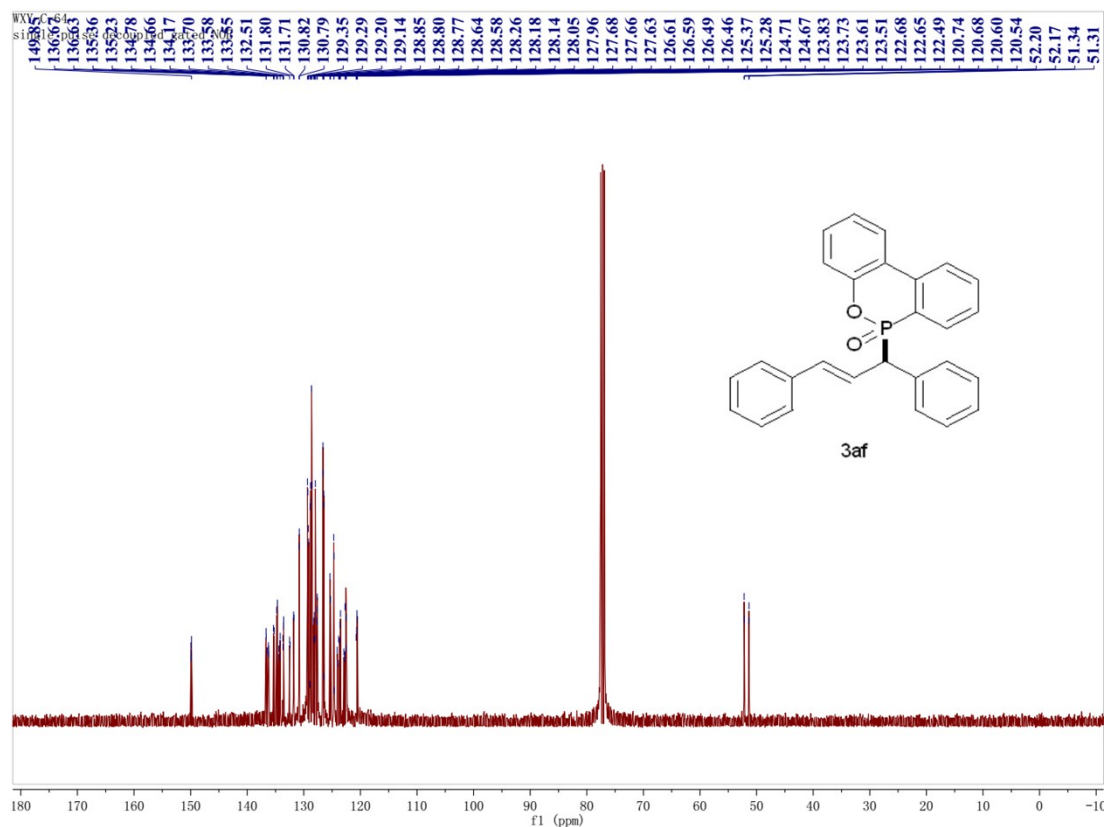

<sup>13</sup>C NMR (101 MHz, Chloroform-d) spectra for compound **3af** (dr = 1/1).

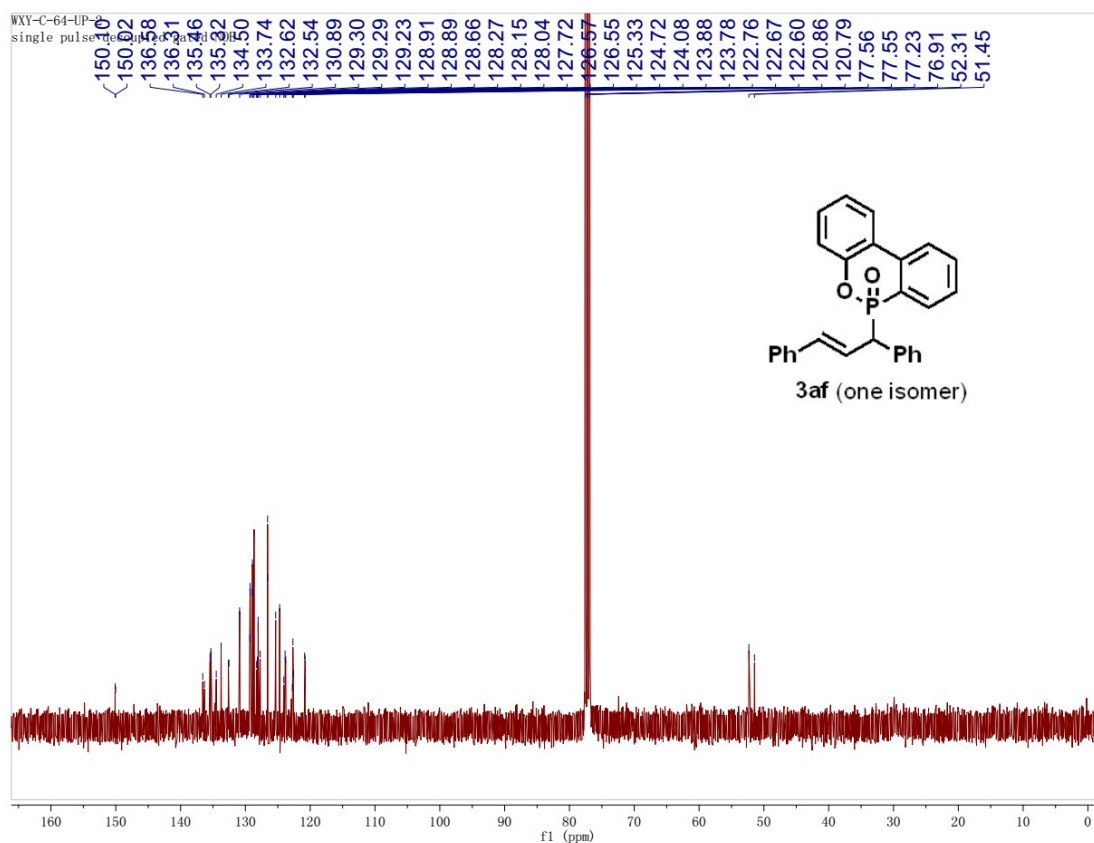

<sup>13</sup>C NMR (101 MHz, Chloroform-d) spectra for compound **3af** (one isomer).

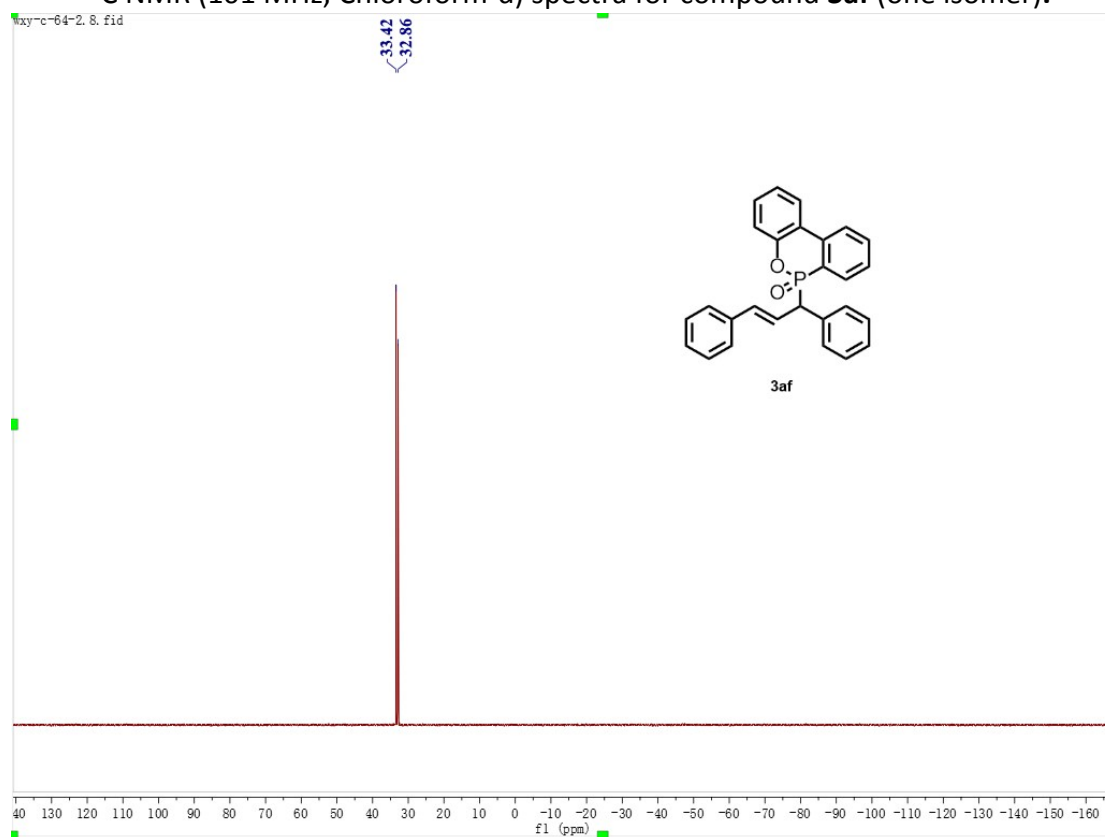

<sup>31</sup>P NMR (162 MHz, Chloroform-d) spectra for compound **3af** (dr = 1/1).



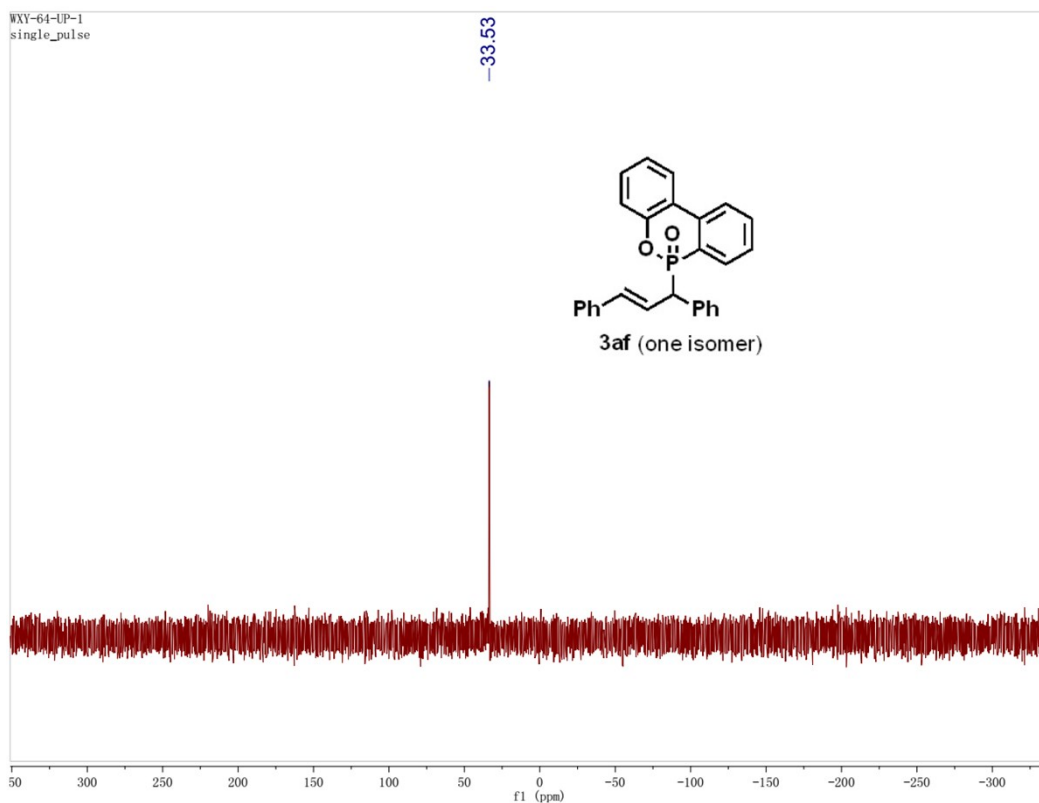

$^{31}\text{P}$  NMR (162 MHz, Chloroform-d) spectra for compound **3af** (one isomer).
